# Supplementary material for: Characterizing glycosyltransferases by a combination of sequencing platforms applied to the leaf tissues of Stevia rebaudiana
Source: Research Square preprint supplement (doi:10.21203/rs.3.rs-24957/v4), 2020-10-20
Supplement: Supplementary file 1 [file 311f24e538fdc4e214569bac.docx]

Additional files

Additional file 1

Table S1. Summary of transcriptome data sequenced by Illumina platform and their pretreatment.

| **Sample** | **raw_reads** | **raw_bases** | **clean_reads** | **clean_bases** | **valid_bases** | **Q30** | **GC** |  |
| --- | --- | --- | --- | --- | --- | --- | --- | --- |
| 023_1 | 49843922 | 7476588300 | 47876648 | 6806329140 | 91.04% | 93.94% | 44.13% |  |
| 023_2 | 48996426 | 7349463900 | 46919448 | 6675057794 | 90.82% | 93.54% | 44.33% |  |
| 023_3 | 49401742 | 7410261300 | 47552518 | 6751209684 | 91.11% | 93.98% | 44.19% |  |
| 110_1 | 49722014 | 7458302100 | 45926926 | 6458642249 | 86.60% | 92.16% | 44.84% |  |
| 110_2 | 49404910 | 7410736500 | 46582200 | 6502944162 | 87.75% | 93.25% | 44.73% |  |
| 110_3 | 49362384 | 7404357600 | 44945204 | 6356051092 | 85.84% | 92.12% | 44.61% |  |
| 11_14_1 | 49653564 | 7448034600 | 47307950 | 6692486455 | 89.86% | 94.15% | 44.49% |  |
| 11_14_2 | 49231842 | 7384776300 | 47763764 | 6812825495 | 92.26% | 95.13% | 44.12% |  |
| 11_14_3 | 49166446 | 7374966900 | 47782594 | 6806876800 | 92.30% | 95.34% | 44.40% |  |
| B1188_1 | 49377538 | 7406630700 | 48234398 | 6924315420 | 93.49% | 95.53% | 44.34% |  |
| B1188_2 | 49777320 | 7466598000 | 47851898 | 6854222317 | 91.80% | 94.71% | 44.16% |  |
| B1188_3 | 49228444 | 7384266600 | 47198328 | 6662790571 | 90.23% | 94.63% | 44.62% |  |
| GP_1 | 49241838 | 7386275700 | 47895052 | 6864522293 | 92.94% | 95.16% | 44.29% |  |
| GP_2 | 49628110 | 7444216500 | 47971050 | 6854301787 | 92.08% | 94.87% | 43.80% |  |
| GP_3 | 49265404 | 7389810600 | 46875058 | 6605777227 | 89.39% | 93.95% | 43.79% |  |
| GX_1 | 49252564 | 7387884600 | 46469388 | 6528722426 | 88.37% | 93.80% | 44.07% |  |
| GX_2 | 49786730 | 7468009500 | 46838488 | 6667098353 | 89.28% | 93.56% | 44.36% |  |

Note: (1) raw_reads: the number of original reads; (2) raw_bases: the amount of original sequencing, i.e. the base number; (3) clean_reads: the number of clean reads after filtration; (4) clean_bases: the amount of sequencing after filtration, i.e. the base number; (5) valid_base: the percentage of effective bases; (6) Q30: the percentage of the base with the Phred value greater than 30; (7) GC: the percentage of the total number of G and C bases in clean bases.

Additional file 2

Table S2. Primers and annealing length in qRT-PCR.

| ***SrUGT* name** | **F-primer(5′-3′)** | **R-primer(5′-3′)** | **length(bp)** |
| --- | --- | --- | --- |
| *SrUGT71H1* | ACCACCATCTCCGTCGTATCT | GATGCGTGCGTTGTATTGATT | 165 |
| *SrUGT85B1-2* | CGCAAAGAGCAACTCGCAAAGAGCAACTATCCGTT | ACACCATCCAACCACCATCC | 125 |
| *SrUGT91D2* | TCCATAGTTGACGACCGTAAGC | ATGAGTGGCGAGATATGAGAAGAG | 176 |
| *SrUGT76G1* | TCTTAACCTCCGACGGCTTG | CCCACTCGCTTGTTCTTCCA | 137 |
| *SrUGT91D4* | CCACTATCGACGTTCACACTCAA | GACGGACGGCAACCAATAC | 144 |
| *SrUGT85C3-1* | AGCATCCACAACACCAGAGAACT | CAGGCAGCAAGTGACCAATACA | 191 |
| *SrUGT79A2* | GCAACAATCCTACGGCATACC | GCGATCCTTCCATCTCCCTAC | 146 |
| *SrUGT73G2* | TGAGGAGTTGGAGCAAGAGTA | CTACCGAAGCAGGCATACACA | 183 |
| *SrUGT71I1* | CGCCAGGTGTCGGTCATC | CGGTTAGAGCAGGAACAGAGA | 122 |

Additional file 3


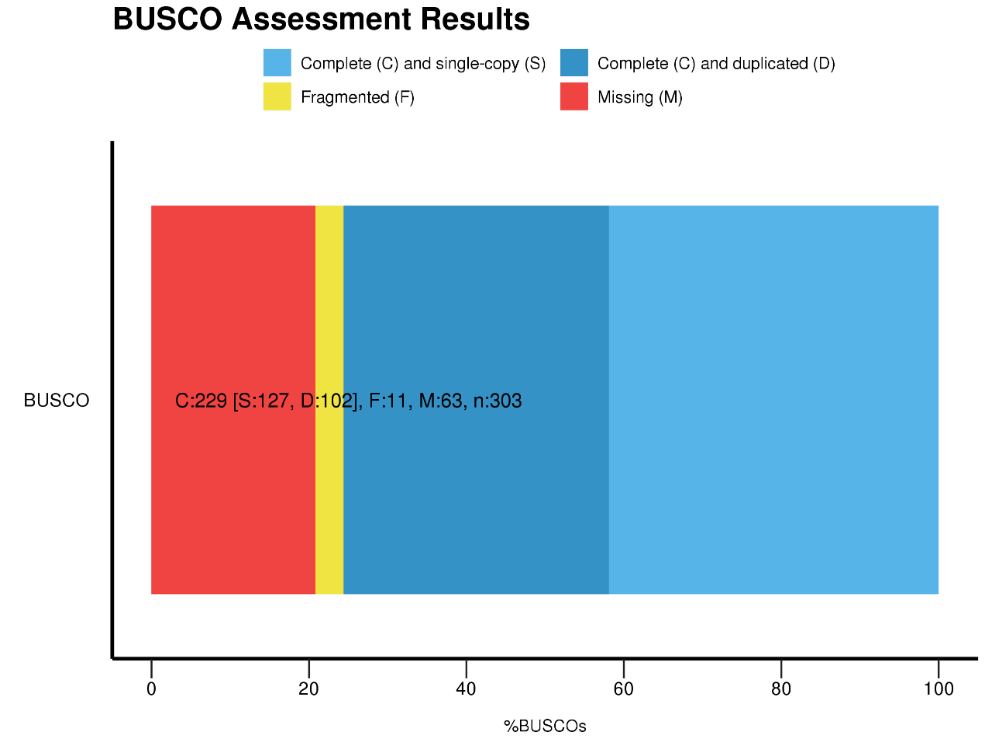


Figure S1. BUSCO assessment of the 30,859 corrected contigs

Additional file 4

Table S3. Primers and annealing temperature of the twenty *SrUGT*s.

| ***SrUGTs*** | **F-primer (5′-3′)** | **R-primer (5′-3′)** | **Annealing temperature (℃)** |
| --- | --- | --- | --- |
| *SrUGT95A2* | ATGGATACCGAAAATCAGACC | TCAAGTTGCTTTTTTGCTAATAAAC | 47.5 |
| *SrUGT87B1* | ATGACGGAATCCGTCAACCA | CTACAGGTCTTTGTCACAACTCTTT | 52.0 |
| *SrUGT85A8-2* | ATGGCTTCAATAGCAGAAATGCAAA | TCACTTTCTTAAAAGAACATCGGTA | 49.0 |
| *SrUGT76I3* | ATGGATACCGATGGAAGAAATAC | TTATAACGACAAAATATAATCAAC | 45.0 |
| *SrUGT91D1-3* | ATGGACGACCATAAGCAGCTTC | TCAAAGCTCATGCTCAATAGCAACC | 54.0 |
| *SrUGT91D3* | ATGGCTAACACCGAGTCCTTG | TCATACGGTTAACGTACGTCGTG | 49.0 |
| *SrUGT75E2* | ATGACCAAAGTTATGGCTCAAACCC | TCATAGAACAGACTCCAACTTGGAT | 51.0 |
| *SrUGT85B2* | ATGGGTTCGAAACACGAAAAC | TCATATTGATGGAGTTTGCATGAG | 50.0 |
| *SrUGT91D1-1* | ATGTTCCCATGGCTTGCTTTC | TCAAAGCTCATGCTCAATAGCAACC | 51.0 |
| *SrUGT85B4* | ATGGGTTCGGTTCAAGAGAAA | TTATTTTGAAAATGTACGAATCAG | 46.0 |
| *SrUGT79A3* | ATGACTTTAACCTGCAAACC | TTATGAAAGAGCCTTCAAGTTC | 47.5 |
| *SrUGT85B3* | ATGGATTCGAAACAAGAAAAAAAGC | TCACTTTGAAAATGTTTTCATGAGA | 47.0 |
| *SrUGT71I1* | ATGGCGACCGAAGTTGCAGA | TCATACGATGTTACTCATGATATCC | 50.5 |
| *SrUGT78D2* | ATGGATACCACCAAAAGCTCCA | TCAAGTGGCAGTACCCGTGACC | 51.5 |
| *SrUGT91D4* | ATGGCTACCACCGAAAACCG | TTAACTCTCATGGTTGTTGGCAACC | 53.0 |
| *SrUGT85C3-1* | ATGGATGCAGTGGTCGAAACAGAAA | CTAGTCTCTTGATAGCACCGT | 51.0 |
| *SrUGT75F1* | ATGTCAAGCAATCGGAAAATC | TTAGTTTCCAAGGTCATTCAAGA | 47.5 |
| *SrUGT76H2* | ATGGGAGATGAGAGAAACCAAA | CTAAGTTGTAACACTTTGTAAAAC | 47.0 |
| *SrUGT88B2* | ATGGGCCACCTGGTTTCCAT | TTACATGTTTGTCCAGGAGT | 47.0 |
| *SrUGT73G2* | ATGGCTTTGGAATCAGTCAAC | TTAGCTACAATAAGTAGTTTCTGGC | 49.5 |

Additional file 5

Table S4. Position in *S. rebaudiana* genome of the forty-four candidate *SrUGT*s.

| Candidate genes | Position in genome | Candidate genes | Position in genome |
| --- | --- | --- | --- |
| SrUGT71I1 | >WOUH01000778.1(P5626437) | SrUGT85B1-2 | >WOUH01007778.1(P31165388) |
| SrUGT74G1-2 | >WOUH01000778.1(P23817375) | SrUGT85C4 | >WOUH01007778.1 (P12642818) |
| SrUGT91D1-3 | >WOUH01000778.1(P19394746) | SrUGT76I3 | >WOUH01007778.1(P37659447) |
| SrUGT91D1-1 | >WOUH01000778.1(P19394746) | SrUGT71H1 | >WOUH01003985.1(P2017) |
| SrUGT73C1 | >WOUH01004839.1(P5037) | SrUGT76H2 | >WOUH01000308.1(P439) |
| SrUGT73C4 | >WOUH01004839.1(P2644) | SrUGT79A1 | >WOUH01007778.1(P20274205) |
| SrUGT73C3 | >WOUH01004839.1(P7770) | SrUGT79A2 | >WOUH01004751.1(P8798) |
| SrUGT73C1 | >WOUH01004839.1(P5037) | SrUGT85B2 | >WOUH01000057.1 (P6105483) |
| SrUGT73C4 | >WOUH01004839.1(P2644) | SrUGT91D4 | >WOUH01000008.1(P207926) |
| SrUGT73C3 | >WOUH01004839.1(P7770) | SrUGT75F1 | >WOUH01015533.1(P1401) |
| SrUGT75E2 | >WOUH01005557.1(P17844656) | SrUGT85B3 | >WOUH01022408.1(P5) |
| SrUGT85B4 | >WOUH01005557.1(P3161467) | SrUGT88B2 | >WOUH01002233.1(P7186) |
| SrUGT85C3 | >WOUH01005557.1(P34459789) | SrUGT71A15P | >WOUH01002667.1(P8254) |
| SrUGT87B1 | >WOUH01005557.1(P92690836) | SrUGT85C5P | >WOUH01002458.1(P10078) |
| SrUGT91D3 | >WOUH01005557.1(P72832223) | SrUGT85C6P | >WOUH01003326.1(P3106) |
| SrUGT92C1 | >WOUH01005557.1(P90385569) | SrUGT75C1P | >WOUH01000061.1(P25373) |
| SrUGT76G1-1 | >WOUH01005557.1(P88275449) | SrUGT71E2P | >WOUH01017008.1(P654) |
| SrUGT85C2-1 | >WOUH01005557.1(P34457130) | SrUGT87A2P | >WOUH01005557.1（P4076813） |
| SrUGT78D2 | >WOUH01005557.1(P3755841) | SrUGT79A4 | >WOUH01005557.1(P72711656) |
| SrUGT95A2 | >WOUH01005557.1(P73836288) | SrUGT91A1P | >WOUH01000078.1(P1311390) |
| SrUGT85C1P | >WOUH01005557.1(P83528949) | SrUGT85E1 | >WOUH01000557.1(P23839145) |

Additional file 6

Nucleotide and protein sequences used for phylogenetic tree in this study

SrUGT71E1

ATGAACCAAATTCAGACCGAAAACACAGATATCAAATCATCAACCTCACAAAAACAAATGTCCACCTCAGAGCTTGTTTTCATCCCATCTCCCGGAGCTGGCCACCTGCCACCAACGGTCGAGCTCGCAAAGCTTCTGTTACATCGCGATCAACGACTTTCGGTTACAATCATCATCATGAATCTCTGGTTAGGTCCAAAACACAACACTGAAGCACGACCTTGTGTTCCCGGTTTACGGTTCGTTGACATCCCTTGCGATGAGTCCACCATGGCTCTCATCTCACCCAAAACTTTTCTATCTGCGTTCGTTGAACACCACAAACCTCGTGTTAGAGACATAGTCCGAGGTATAATTGAGTCTGACTCGGTTCGACTCGCTGGGTTCGTTCTTGATATGTTTTGTATGGCGATGAGTGATGTTGCAAACGAGTTTGAAGTTCCGAGTTACAATTATTTCACATCCGGTGCAGCCACGTTAGGGTTGATGTTTCACCTTCAATGGAAACGTGATCATGAAAGTTATGATGCAGCCGAGTTGAAAAACTCGGATACTGAGTTGTCTGTTCCGAGTTATGTTAACCCGGTTCCTGCTAAGGTTTTACCGGAAGTGGTGTTGGATAAAGAAGGTGGGTCCAAAATGTTTCTTGACCTTGCGGAAAGGTTTCGCGAGTCGAAGGGTATAATAGTAAATTCATGTCGGGCGATTGAAAGACACGCGCTCGAGTACCTTTCAAGCAACAATAACGGTATCCCACCTGTTTTCCCGGTTGGTCCGATTTTGAACCTTGAAAACAAAAAAGACGATGCTAAAACCGACGAGATTATGAGGTGGTTAAATGAGCAACCGGAAAGCTCGGTTGTGTTTTTATGTTTCGGAAGCATGGGTAGCTTTAACGAGAAACAAGTGAAGGAGATTGCGGTTGCGATTGAAAGAAGTGGACATAGATTTTTATGGTCGCTTCGTCGTCCGACACCGAAAGAAAAGATAGAGTTTCCGAAAGAATATGAAAACTTGGAAGAAGTTCTTCCAGAGGGATTCCTTAAACGTACATCAAGCATCGGGAAGGTGATCGGGTGGGCCCCGCAAATGGCGGTGTTGTCTCACCCGTCAGTTGGTGGGTTTGTGTCGCATTGTGGTTGGAACTCGACATTGGAGAGTATGTGGTGTGGGGTTCCGATGGCAGCTTGGCCATTATATGCTGAGCAACAGTTGAATGCTTTTCTACTTGTGGTGGAACTGGGATTGGCGGCGGAGATTAGGATGGATTATCGGACGGATACGAAAGCGGGGTATGACGGTGGGATGGTGGTGACGGCGGAGGAGATTGAAGATGGAATTAGGAAGTTGATGAGTGATGGTGAGATTAGAAATAAGGTGAAAGATGTGAAAGAGAAGAGTAGAGCTGCGGTTGTTGAAGGTGGATCTTCTTACGCATCCATTGGAAAATTCATCGAGCATGTATCGAATGTTACGATTTAA

MNQIQTENTDIKSSTSQKQMSTSELVFIPSPGAGHLPPTVELAKLLLHRDQRLSVTIIIMNLWLGPKHNTEARPCVPGLRFVDIPCDESTMALISPKTFLSAFVEHHKPRVRDIVRGIIESDSVRLAGFVLDMFCMAMSDVANEFEVPSYNYFTSGAATLGLMFHLQWKRDHESYDAAELKNSDTELSVPSYVNPVPAKVLPEVVLDKEGGSKMFLDLAERFRESKGIIVNSCRAIERHALEYLSSNNNGIPPVFPVGPILNLENKKDDAKTDEIMRWLNEQPESSVVFLCFGSMGSFNEKQVKEIAVAIERSGHRFLWSLRRPTPKEKIEFPKEYENLEEVLPEGFLKRTSSIGKVIGWAPQMAVLSHPSVGGFVSHCGWNSTLESMWCGVPMAAWPLYAEQQLNAFLLVVELGLAAEIRMDYRTDTKAGYDGGMVVTAEEIEDGIRKLMSDGEIRNKVKDVKEKSRAAVVEGGSSYASIGKFIEHVSNVTI

SrUGT71F1

ATGGGTCATGCTGGTCAAGCCATTGAGCTAGCCAGACTCTTCGTCGAACGATTTCACCATCTAACCATCACGGTGCTCGTGATGAAGCTACCCGGTGATCCAATCGGCAATGAATACACCGATTCTCTCACCGACAAAAGTTGCATCAAATTCATCCATTTCCCTCCAATGGATCTTGATTTGTTTCAAGATTGTTCAAACTTTGGGTTCTTGGCCGAAGAAGTTATTTCTCGCCATAAGCCCATCATAAGGGATCTTGTGGCTAGTCGGTTCAACAGGTCTGGGTCTGATCATCGACTGGGTGCGTTGGTTGTTGACATGTTTTGTACACCAATGATCGATGTTGCCAAGGAGTTTAACATCCCAGCTTACGTGTTCTTCCCCTCTAATGCCGCTTTTCTTGGAATCATCTTTCATTTCCAGACCCTTGACGATGAACATGGTCAAAACATATTAGAACTCGTACACTCAGACACTGATCTAACGGTCCCAAGCTATGCCAACCCGGTTCCTCCGAGTGTCATGCCTACGGTGTTTTGGGCTAAGGATCAATGGCCCAAAAGGTTCATTATTCACACCCGAAAGTACAGAGAAGCCAAGGGCATAATCGTAAATACGTTTCAAGAGCTTGAACATCACGCCCTTCGATCCTACGATGATAAAACACCTCCGGTGTACCCGGTGGGTCCTTTGTTGAAACCCATAGAACCGACACCGAGCAACGAAGTGTTGCAATGGTTGAAAGATCAACCGAAGTCATCGGTCCTACTTTTATGCTTTGGGTCTAGGGGTTGCTTCGATGCGGACCAAGTGAGAGAGATAGCGGTTGCAATAGAAAGAAGCGGATGCCGGTTCATATGGTCCCTACGCCGGCCTTCTAACGACGAGCAAAAAGGATTGCCGGATGAATACACGGATTACAACGAAGTTTTGCCATATGGATTCCTCGAGCGTACAGCTGGAAAGGGGAAAGTGATTGGGTGGGTCCCACAGTCGGAAGTGCTGGCTAACGTGGCGACCGGGGGGTTCGTGTCCCACTGCGGGTGGAACTCCATACTCGAGAGCCTTTGGTACGGGGTTCCGGTCGCAACATGGCCAATATACGCAGAGCAACAACTAAATGCATTTCAAATGGTTAAAGACTTGGGTTTGGCGGTTGAAATTTCTTTGGATTATAACCAAATAAACAAGAATCAAAAGCCAGTTTCAGCGGAAGACATTGAGAAGGGAATAAGAGAAGTGATGGATAGCAATAGCGCGGTTAGAGCCAACGTGAAGAAGATGAAAGATACGGGCCGAATGGCGATTGAAGAAGGCGGTTCATCGTTCGAAAGTTTGAGTCGTCTTGTTAATGATATTATGTAG

MGHAGQAIELARLFVERFHHLTITVLVMKLPGDPIGNEYTDSLTDKSCIKFIHFPPMDLDLFQDCSNFGFLAEEVISRHKPIIRDLVASRFNRSGSDHRLGALVVDMFCTPMIDVAKEFNIPAYVFFPSNAAFLGIIFHFQTLDDEHGQNILELVHSDTDLTVPSYANPVPPSVMPTVFWAKDQWPKRFIIHTRKYREAKGIIVNTFQELEHHALRSYDDKTPPVYPVGPLLKPIEPTPSNEVLQWLKDQPKSSVLLLCFGSRGCFDADQVREIAVAIERSGCRFIWSLRRPSNDEQKGLPDEYTDYNEVLPYGFLERTAGKGKVIGWVPQSEVLANVATGGFVSHCGWNSILESLWYGVPVATWPIYAEQQLNAFQMVKDLGLAVEISLDYNQINKNQKPVSAEDIEKGIREVMDSNSAVRANVKKMKDTGRMAIEEGGSSFESLSRLVNDIM

SrUGT71H1

ATGGGCAACCTTGTTCCCGCCGTAGAATTTGCAACCCACTTAATCAACCACCATCTCCGTCGTATCTCCGTCACAATACTCACCATCTCCATGCCTCAGTGGCCAATCATGGATCACTATCTCCGATCTCAAACATCCACCACTCACATCCGGTTCATCCAACTCCCTCCGGCCGACACACCATCACCAAATCAATACAACGCACGCATCGAATTCATTTCACTCTATATACAAAACCACAAACCCATAGTCCAACAAACACTCAAAAACCTTGCCACCAACAATTCCAACGAGCCACTCGTCGGCTTTTTCTTCGACATGTTTTGCACCTCGATGATTGACGTCGCAAATGATCTAAACATTCCTTGTTATCTCTACTTCGCGTCTCCGGCCGCTTATCTTGGTTTTGTAATCCACCTCACATCACTGCCAGACTCGGTCACTGAGTCTAACGACTCAGACTCAGTGACCGAGTTGACGGTACCGAGTTTCATCAACCCGGTTCCGTCAGCCGCCTTTCCGTTATTTTGTATTAACAAAAACGAACTTGGTTACTCATGTTTTGTACGTCATGCGGCTAGGTATAAAGACACCAAGGGCATAGTTGTAAATACGTTCCAAGAGCTTGAACCATACGCGCTTGACTCTCTGTCTTCTGATTACACCGAGTTGCCACCGGTTTACCCGATTGGACCGGTGGTTGATCATGTGGGACCGGTTAAGTGGCATCCTAACCGATCCGGGCATGAAAAGGTGATCAAGTGGCTCGACCAACAACCTGATTGTTCGGTTGTTTTCTTGTGTTTTGGTAGCATGGGGAGTTTGAACCGGGCCCAAGTGAGGGAAATAGCAACGGGTCTGGATCGGGCCGGGTACCGGTTTTTGTGGTCCTTTCGTGAACCCGCGAAGACGAAGCTGGAGCTTCCAGACGACTATGAAGAACTCGAAGATGATTTGTTTCCAGATGGGTTTGTTAATCGAACGGCCGATATTGGGTTGGTGTGTGGTTGGGTTTCTCAAGTGAGTGTGTTGGCTCACAAAGCGATTGGTGGGTTTGTGTCACATTGTGGTTGGAACTCAATTTTGGAGAGCTTATCGTACGGTCTACCGATTGCCACGTGGCCATTGTACGCGGAACAACATTTGAATGCGTTTGAGATGGTCAAAGAGGTTGGATTGAGTTTGGAGATAAGATTCGATATGGGGAATGATCTGGTGTTGGCGGATGAAGTGGAGAGAGGTGTGAGGGAGTTGATGGACGGTGGTGATGGTGAGTTGAAGAAAAAAGTCAAAGAAATGAGTGAAAAGAGTAAAATAGCTTTGATGAAAAACGGGTCTTCATTTCAAGCTCTAGAGAAATTGACGAATGTTCTTCTATCCGAAGTTCAAAATTAA

MGNLVPAVEFATHLINHHLRRISVTILTISMPQWPIMDHYLRSQTSTTHIRFIQLPPADTPSPNQYNARIEFISLYIQNHKPIVQQTLKNLATNNSNEPLVGFFFDMFCTSMIDVANDLNIPCYLYFASPAAYLGFVIHLTSLPDSVTESNDSDSVTELTVPSFINPVPSAAFPLFCINKNELGYSCFVRHAARYKDTKGIVVNTFQELEPYALDSLSSDYTELPPVYPIGPVVDHVGPVKWHPNRSGHEKVIKWLDQQPDCSVVFLCFGSMGSLNRAQVREIATGLDRAGYRFLWSFREPAKTKLELPDDYEELEDDLFPDGFVNRTADIGLVCGWVSQVSVLAHKAIGGFVSHCGWNSILESLSYGLPIATWPLYAEQHLNAFEMVKEVGLSLEIRFDMGNDLVLADEVERGVRELMDGGDGELKKKVKEMSEKSKIALMKNGSSFQALEKLTNVLLSEVQN

SrUGT71I1

ATGGCGACCGAAGTTGCAGAGCTCGTGTTCATCCCAACGCCAGGTGTCGGTCATCTAATGGTCACAATCGAGATGGCAAAACTACTCTTGAACCGCGATCAAAGACTTTCAATAACCGTTCTTCTCATCAACCCTCCTTTCTCTGTTCCTGCTCTAACCGCATACATTGAATCGTTGTCTAAAAACACAATCGAACGCGTACGATTCATCAACCTCCCGCATAATCCAACATCACCAAAATTCGACCCCAAAGCTCCCGTTACTTCTTTCTTTGAGTTCATCAACAGTCATTGCGAATACGTCAGAGATATCGTTACTGACATTATAAATCAAACCGGTTCGAGTCGGATCGTTGGGTTTGTTGTTGACATGTTATGCACGGGCTTGATCGATGTGGTTAATGAATTTAATGTCGCGTCATACGTTTTCTACCCGTCTAATTCTGCTTTTATCGGTTTAAACATGTATATCGAGACACAACATGTGGATCAGAAACAAGATCTTGTTAAAATGAGTTATGAATCCGAAGGCGAGATTTCTTTTCCGTGTTTTGTTAATCCGATACCGACGAGGGTTGTTCGGGCGGTGTATCAGAAAGACGAGCGAACGGAGTTTCTAGTACAATGTTTTCGGAATTTGAGAAAGGCTAAAGGGATTATGGTTAATACGTTTTTGGAGTTGGAAACACACGCGATCAATTCGTTTTCGAAAACTAACTTCCCGCGCGTGTATCCTGTGGGACCCGTACTTAATCTAGACGGTGTTGATGGAAAAGCTGAAGACAAGGATGTACTAAGTTGGTTGGACGATCAACCGCCTTCTTCAGTGGTGTTGTTATGTTTTGGTAGTATGGGAAGCTTTATTAAGCCCCAAGTGGTGGAAATAGCGCGCGGTTTAGAACAAAGTGGTCATCGTTTTGTTTGGTCTCTGCGCGTACCTCCACCGTCAAAACAATCGTTTGATGTGGTTCCTGATAATTACGACGACCCAAGAAGGCTATTGCCGGATGGGTTCCTTGAGCGAACCATGGGAATAGGGAAAGTGATTGGATGGGCCCCACAAGTGGCGTTGTTGGTCCATGAAGCGGTTGGAGGGTTCGTGACCCACTGTGGATGGAACTCGATGCTAGAGAGCTTGTGGTTCGGTGTACCAACAGCTACATGGCCAATGTATTCTGAGCAGCAGATGAATGCATTTGAAATGGTGGTGGAGCTTGGACTCGCGGTTGACTTGAAGATGGATTTTAATATGAACGTTTTTAATCGTGAGAGTGAGATCGTTGTTGTGACGGCAAAGGAGATAGAGACGGGAATAAGGCGACTAATGGAGGACGAAAAGGTCAGAACGAAAGTGATAGAGATGAGTAAATTGAGTAGAGCAACAGTGGTTGATGGTGGTTCATCGTATGCTTCGGTTGGCTACCTTGTTCAGGATATCATGAGTAACATCGTATGA

MATEVAELVFIPTPGVGHLMVTIEMAKLLLNRDQRLSITVLLINPPFSVPALTAYIESLSKNTIERVRFINLPHNPTSPKFDPKAPVTSFFEFINSHCEYVRDIVTDIINQTGSSRIVGFVVDMLCTGLIDVVNEFNVASYVFYPSNSAFIGLNMYIETQHVDQKQDLVKMSYESEGEISFPCFVNPIPTRVVRAVYQKDERTEFLVQCFRNLRKAKGIMVNTFLELETHAINSFSKTNFPRVYPVGPVLNLDGVDGKAEDKDVLSWLDDQPPSSVVLLCFGSMGSFIKPQVVEIARGLEQSGHRFVWSLRVPPPSKQSFDVVPDNYDDPRRLLPDGFLERTMGIGKVIGWAPQVALLVHEAVGGFVTHCGWNSMLESLWFGVPTATWPMYSEQQMNAFEMVVELGLAVDLKMDFNMNVFNRESEIVVVTAKEIETGIRRLMEDEKVRTKVIEMSKLSRATVVDGGSSYASVGYLVQDIMSNIV

SrUGT95A2

ATGGATACCGAAAATCAGACCAAGAAAAGAAAGCTTGAATCCACAACAATGGAAGCTGCCGGTGAGATCTTTGTTCTACCATTCTTCGGTCAAGGTCATCTCAACCCATCGATGGAACTCTGCCGGAACATCTCCTCTCATAACTTCAATGTCACACTCATCATCCCCTCTCACCTTTCTTCATCGATCCCTACAACTTTTCCCGGCGATTCGCCCTTCATTCATGTTGCAGAGATTCCGTTCGCCGCTTCTCCGCCGGAAACAGAGGCTCCGAATTGGGGGAACCGTTTTGAACAGCAGAATAAACAGATGGGTGAGGGAATCAAGTCGTTTTTGTCGAATAGATCCGGAATCCGACCCACGTGCGTTGTGATTGATGTTATGATGAGCTCGATCAAGGAGATTTTTGCAGATCACCGGATTCCGGTGGTGTCGTTTTTCACTTCCGGCGTGACGAATTACGCCATAGAGCACGGAAAGTGGAAGGCGAAGATCGGAGACTTGAAACCCGGTGAGACCCGAGAGTTACCCGGGTTACCCAAAGAAATGGCTGCTACTTATTCGGATCTTTTCAAAGGTCCGAGAGGAAGACCTCAGAGACCCAACCTGCCGACTGGAGATCACGCAAACCGGGTCGGACCGCCACATGGATCAAGGGGCCACCGCGGTCCACCCGGTCCGGGTGATAAGCCACGTTGGGTTGACGAAGTTGATGGAGCGGTCGCGTTGCTTATCAACACATGCGACAATCTCGAGCGTTTGTTCCTCGATTACCTCGCGGAACAAACCAAGGTTCCGGTGTGGGGCGTCGGACCGCTCCTACCGGAAAAATTCTGGCAATCCGCCGGTTCAATCCTCCACGATCGGGATATGAGATCGAATCGGAAAGCTAATTACTCAGAAGACGAAGTTTTCCAATGGCTAGAGTCCAAACCAATAGGTTCGGTGATCTACATCGCATTCGGAAGTGAAGTTGGACCATCGATTGATGAATACAAAGAGCTAGCGAAAGCGTTGGAAGAATCGAACCACGCTTTCATATGGGTGATCCAACCCGGTTCGGGTAAAAACCCGATCCCAAAATCTTTTTTAGGACCGGTTCAAACCGATAGCGAAGAAGAACAAGAAGGTTACTATCCAGATGGTTTAGACAAAATAGTTGGGAATAGGGGTATGATCATCACCGGATGGGCCCCACAATTGTTGATTCTGAGCCACCCATCAACCGGTGGGTTCTTGTCACACTGCGGTTGGAACTCGACTGTTGAGGCGATTGGTCGAGGGGTCCCGATCTTGGGTTGGCCAATTAGGGGTGATCAGTTTGAAAATGCGAAGCTGGTGGCTAACCATCTCAAGATTGGGTTCGTGATTGCAAGTGGGGTCGGTGAAGACGGTCGGCCGAAAAGGTTCAACAAGGATGATATAGCAACAGGGGTTGAGAAACTGATGAGTGATGAAGAGGTTCATGAAAATGCCAAGAAATTAAGTAAGGAGTTTGAAAGTGGGTTTCCAGTGAGTTCGGTTAATGCTTTGGGTGCATTTGTGGAGTTTATTAGCAAAAAAGCAACTTGA

MDTENQTKKRKLESTTMEAAGEIFVLPFFGQGHLNPSMELCRNISSHNFNVTLIIPSHLSSSIPTTFPGDSPFIHVAEIPFAASPPETEAPNWGNRFEQQNKQMGEGIKSFLSNRSGIRPTCVVIDVMMSSIKEIFADHRIPVVSFFTSGVTNYAIEHGKWKAKIGDLKPGETRELPGLPKEMAATYSDLFKGPRGRPQRPNLPTGDHANRVGPPHGSRGHRGPPGPGDKPRWVDEVDGAVALLINTCDNLERLFLDYLAEQTKVPVWGVGPLLPEKFWQSAGSILHDRDMRSNRKANYSEDEVFQWLESKPIGSVIYIAFGSEVGPSIDEYKELAKALEESNHAFIWVIQPGSGKNPIPKSFLGPVQTDSEEEQEGYYPDGLDKIVGNRGMIITGWAPQLLILSHPSTGGFLSHCGWNSTVEAIGRGVPILGWPIRGDQFENAKLVANHLKIGFVIASGVGEDGRPKRFNKDDIATGVEKLMSDEEVHENAKKLSKEFESGFPVSSVNALGAFVEFISKKAT

SrUGT85B4

ATGGGTTCGGTTCAAGAGAAAAAGGCGCCACATGTTGTGTGCATACCGGCACCACTTCAAGGTCACATTAACCCGATGCTAAAACTAGCCAAAATCCTGCACTCCAAAGGCTTTCTTATCACCTTTGTCAACACCGAGTTTAACCACCAACGGCTCGTTAGGTCACAGGGGGTTGAAGCCCTACACGGGCTCCCAACCTTCCGGTTTGAGACCATCCCAGATGGTCTACCGCCACCTGAAAACAAAGATGCCACCCAAGATATCCCGACTCTAGCCAAGTCGGTTGATGAAAACTTTTTGGGTCCGTTTAAAAGTCTTGTAACCAAAGTGGGTGCTTTGTATGCACCCGTGACTTGTATCGTGTCTGACATGCTTATGTGCTTCACTCTTGATGCCGGTGCTGAATTGGATATCCCGGTAATACTCCATTGGACCAGTGGTACTGGTTCTTTGATATGTTACAATGAATATCCTAATCTATTGGAAAGCAAATTGATGCCCCTCAAAGATGCAAGTTATTTAGTGAATGGTTACTTAGATACGATTGTAGATTCTATCCCCATTTTGCATGGCATACGTTTAAGAGATTTCCCTCCCTTCATTAGAAAGATCTTTCCTGGTGATGAGTTCATGGTTCAATTTTTGACTTCACAAGTAAACAAAGCAAAAAACGGATCTTCTGCTATCATTTTCAACACTTTTGATGAACTAGATCGTGATGTTTTAGACACACTCGCTTCAATGTATCCTCCATGTTATGGAATTGGTCCGTTACATCTACTAGAGAAACATGTTACCGATAAATCTCTTGATTTCGTGAAATCAAACCTTTGGAAAGAAGAACCCGAATGTTTAAAATGGTTAGATACACAAGCTCCATCATCAGTCATTTATGTGAATTTTGGTAGCATTACAGTAATGACACCTCAACAACTAGTCGAGTTTTGTTGGGGACTCGCAAAGAGCAACTATCCGTTCTTATGGATAATACGACCTGACCTTGTGATTGGTGATTCCGCGATGCTTCCACCCGAGTTTGTAAAGGAAACAAGTGATAGAGGGATGCTGGTTGGATGGTGTCCTCAAGAAGAAGTTTTGAATCACCCGTCAATTGGAGGGTTTTTAACGCACAGTGGATGGAATTCAACGCTTGAAAGTATTTCGAGTGGTGTGCCGATGATTTGTTGGCCGTTTTTTGCGGATCAACAAACGAATTGCTGGTGGAGTTGCAACAAATGGGGTGTTTCCATGGAGATTGATAATAATGTGAAGAGTGATGAAGTTTCAAAGCTTGTGATTGAATTAATGGATGGAGAAAAAGGAAAGGAAATTAAGAAGAATGCCATTGACTTGAAGAATAAAGCTAAGGATGCATGTACCTCTCCTTTGGGTTCATCCGTGGCTAATTTGGAGAAAGTGGTTCAACTGATTCGTACATTTTCAAAATAA

MGSVQEKKAPHVVCIPAPLQGHINPMLKLAKILHSKGFLITFVNTEFNHQRLVRSQGVEALHGLPTFRFETIPDGLPPPENKDATQDIPTLAKSVDENFLGPFKSLVTKVGALYAPVTCIVSDMLMCFTLDAGAELDIPVILHWTSGTGSLICYNEYPNLLESKLMPLKDASYLVNGYLDTIVDSIPILHGIRLRDFPPFIRKIFPGDEFMVQFLTSQVNKAKNGSSAIIFNTFDELDRDVLDTLASMYPPCYGIGPLHLLEKHVTDKSLDFVKSNLWKEEPECLKWLDTQAPSSVIYVNFGSITVMTPQQLVEFCWGLAKSNYPFLWIIRPDLVIGDSAMLPPEFVKETSDRGMLVGWCPQEEVLNHPSIGGFLTHSGWNSTLESISSGVPMICWPFFADQQTNCWWSCNKWGVSMEIDNNVKSDEVSKLVIELMDGEKGKEIKKNAIDLKNKAKDACTSPLGSSVANLEKVVQLIRTFSK

SrUGT87B1

ATGACGGAATCCGTCAACCACCATGTGGTGGCGATACCATATCCCGGCAGAGGCCACATCAACCCGATGATGAACCTCTGCAACCTCATCTCTCTACGCCGACCATCCGACTTCCTCATCACCGTCGTCGTCACCGAAGAGTGGTTGGGCTTCATCGGAAGTGAACCTAAACCGACCAACATCCGGTTCGCCACCATCCCTAACGTCATCCCGTCGGAGGTCAACCGAGCCGCTGATTTCACCGGATTTACAAAAGCCACACAAACCAATATGGAAGATCCGGTCGAGCAGTTGCTCCGGCGGATGGAAATACCGGCTAGTGTTATCATATACGATACTTACCTTCCATGGGTGTTGAACATCGGAAACCGGATGAATACTCCGGTGGCGAGTTTGTTTACGATGTCGGCAACGGTGTTCTCCATGTGTTACAATTACCATCTTCTCGTTGAAAATCACCACGTTGGTGATAACTTCTCTGGAAACACCGAGGAAATAGTAGATTACATACCCGGAGTTCCTCCGATGAAGGTGGCTGATCTTTTGACAGGCTTCAATGGCAATGGCAAAGAAGTTACACCGATAGCTTTGAATGGCATTATGATTTCTCCAAAAGCTCAGTTTCTCATTTTCGCATCAGTTTATGAGCTCGAAGCTCATGTCATTGATGCTTTAAAGTCGGATCTTTCTATACCAGTTTATGCGATCGGACCTGCAATTCCTTACTTTAATTTCAATGACGTGGAAAAAGACCAAAATACCCCTGACTACTTCAAATGGTTGGACCGTCAACCAGAGGGTTCGGTGTTGTACATTTCACAAGGGAGTTTTCTCTCGGTCTCGAGCGCCCAACTAGATGAAATCGTGGCGGGTGTGCTGGATAGTGGAGTGCGATACATGTGGATTATGCGTGACGAAACGTCTCGCTTTAAACGTGAAGATGATGATAAAGGGATAGTTGTACCTTGGTGTGACCAATTACGAGTGTTGTGCCATCGTTCTGTAGGGGCATTTTGGTCACATTGCGGGTGGAATTCGACTAAAGAAGGTGCTTATTCGGGAAAGCCCATGATTTGTTTTCCCATATTTTGGGATCAAGTCCCGAATAGTAAAATGATAGTTGAAGACTGGAAAATCGGTCGGAGAGTGAAGAACAATGAGGGTAATATGGTCACTCGAGATGAAATTTCGATACTCATTAAAAGTTTTATGGATCCAAACGGGAAAGATATAAGGAACCGGAGTAAAGAAGTTGAAAAGATTTGTCGGCAAGCAACATCAGAAGGTGGATCTGCCCAAATAGATATTGATTCATTCATTCGCGACATTTCAAAGAGTTGTGACAAAGACCTGTAG

MTESVNHHVVAIPYPGRGHINPMMNLCNLISLRRPSDFLITVVVTEEWLGFIGSEPKPTNIRFATIPNVIPSEVNRAADFTGFTKATQTNMEDPVEQLLRRMEIPASVIIYDTYLPWVLNIGNRMNTPVASLFTMSATVFSMCYNYHLLVENHHVGDNFSGNTEEIVDYIPGVPPMKVADLLTGFNGNGKEVTPIALNGIMISPKAQFLIFASVYELEAHVIDALKSDLSIPVYAIGPAIPYFNFNDVEKDQNTPDYFKWLDRQPEGSVLYISQGSFLSVSSAQLDEIVAGVLDSGVRYMWIMRDETSRFKREDDDKGIVVPWCDQLRVLCHRSVGAFWSHCGWNSTKEGAYSGKPMICFPIFWDQVPNSKMIVEDWKIGRRVKNNEGNMVTRDEISILIKSFMDPNGKDIRNRSKEVEKICRQATSEGGSAQIDIDSFIRDISKSCDKDL

SrUGT85A8-2

ATGGCTTCAATAGCAGAAATGCAAAAGCCACATGCCATATGCATCCCCTACCCAGCCCAAGGCCACATCAACCCCATGATGCAATTTGCTAAGCTCCTTCACTTCAAAGGCTTTCACATCTCTTTTGTCAATAACCACTACAACCATAAGCGGTTGCAGCGGTCCCGCGGTCTGTCCGCCCTCGAAGGTCTACCTGATTTTCATTTCTACTCGATTCCCGATGGCCTTCCGCCTTCAAATGCTGAGGCCACCCAGTCGATCCCCGGGCTATGTGAGTCGATTCCTAAGCACAGTTTGGAACCATTTTGTGAATTGATCGCTACGCTAAATGGTTCGGACGTGCCACCTGTAAGCTGTATAATCTCTGACGGGGTCATGAGCTTTACGCTTCAAGCTGCCGAGAGGTTCGGGTTGCCGGAAGTTTTGTTCTGGACCCCAAGTGCTTGTGGGTTTTTGGCTTACACTCACTATCGAGATCTTGTGGATAAGGAGTATATTCCCCTCAAAGACACGAAGGACTTGACAAATGGGTATTTAGAAACAAGCTTGGATTGGATTCCTGGGATGAAAAACATCCGATTAAAAGATTTCCCATCCTTTATTCGAACCACAGACATAAATGATATTATGCTCAATTATTTCTTGATTGAAACCGAAGCGATCCCAAAAGGCGTAGCGATCATTCTTAACACATTTGACGCGTTAGAAAAAGATAGTATTACGCCTGTACTTGCTCTAAATCCACAAATATACACCATTGGTCCATTACACATGATGCAACAATATGTCGATCATGATGAGAGACTCAAACACATTGGGTCCAACCTTTGGAAGGAAGATGTGAGCTGCATCAATTGGCTTGACACCAAAAAGCCTAATTCGGTTGTTTATGTGAACTTTGGAAGTATTACGGTTATGACGAAAGAACAACTGATCGAGTTTGGGTGGGGACTGGCTAATAGCAAGAAGGATTTCTTGTGGATAACGAGGCCTGATATTGTTGGAGGCAATGAAGCCATGATACCACCAGAGTTCATAGAGGAGACCAAAGAAAGGGGCATGGTTACTAGCTGGTGCTCTCAGGAAGAGGTTTTAAAACATCCATCAATCGGGGTATTCTTGACTCATAGTGGATGGAACTCGACCATTGAGAGTATTAGCAACGGTGTTCCCATGATTTGTTGGCCTTTTTTTGCAGAGCAACAAACAAATTGTCGGTATTGTTGTGTTGAATGGGAAATTGGATTGGAAATTGATACAGATGTGAAGAGAGAGGAGGTAGAGGCTCAAGTGAGGGAGATGATGGATGGGTCGAAAGGGAAGATGATGAAAAACAACGCTTTGGAATGGAAGAAGAAGGCTGAAGAAGCGGTATCCATTGGTGGATCTTCTTATCTCAACTTTGAAAAATTAGTTACCGATGTTCTTTTAAGAAAGTGA

MASIAEMQKPHAICIPYPAQGHINPMMQFAKLLHFKGFHISFVNNHYNHKRLQRSRGLSALEGLPDFHFYSIPDGLPPSNAEATQSIPGLCESIPKHSLEPFCELIATLNGSDVPPVSCIISDGVMSFTLQAAERFGLPEVLFWTPSACGFLAYTHYRDLVDKEYIPLKDTKDLTNGYLETSLDWIPGMKNIRLKDFPSFIRTTDINDIMLNYFLIETEAIPKGVAIILNTFDALEKDSITPVLALNPQIYTIGPLHMMQQYVDHDERLKHIGSNLWKEDVSCINWLDTKKPNSVVYVNFGSITVMTKEQLIEFGWGLANSKKDFLWITRPDIVGGNEAMIPPEFIEETKERGMVTSWCSQEEVLKHPSIGVFLTHSGWNSTIESISNGVPMICWPFFAEQQTNCRYCCVEWEIGLEIDTDVKREEVEAQVREMMDGSKGKMMKNNALEWKKKAEEAVSIGGSSYLNFEKLVTDVLLRK

SrUGT76I3

ATGGATACCGATGGAAGAAATACCAGTCTCCAGTCAACACACCCGCCGGAGACTCGCCGGAGAATATTATTCTTCCCCTTACCTTTCCAAGGTCACATCAACCCCATGTTTCAGCTCGCAAACATTCTTCACACCCAAGGTTTCAAAATAACCATCATACACACCCAATTCAACTCACCGGACCATTCAACCTATCCTTACTTCCAATTCCGGTCCATAATCGACCGTTTATCCGAGGTCGAACACCTGTTTCCGACGATCCGAGATCCAAGCTATTTCATCAAGTACCTTAATAAAAACTGTGAGGTTTCGTTTAGGGATTGTTTGATTGGGTTGTTGGATGAGGAACCGGTGGCTTGTTTGATCGCCGATGCGATGTTCTACTTCACGCAGGCGGTTGCCGATGATCTGAAACTACCTCGGTTGGTGCTCCGGACTAGTAGTCTTGGTTGCGCCATTGGTTATGGAGCTTTACCGTTTTCCTCGATCGGAGATGGTGTTAACCTTCCCAAACAAGATCCAGGTTATGAGACACCGGTGCGAGAATATCCACTAATTAAAGTTAAAGACATGTTGAAGGTAGCGGTTAACCCGGAAGGCTACGGTGACCTAGTGACCAACATGCTTAAACAAATGAAAGCGTCATCTGGAATCATATGGAATACGTTCAAAGAACTCGAAGAACCCGAACTAGAAACAATCAATCATGATTTTCGAGTTCCAAACTTCACTTTAGGCCCGTTTCATAACTACTTTCCAGCAACTTCAACAAGCTTGATTGAACAAGACAGAACCATTCTCTCATGGCTCGACACAAAACCTCCCAAATCCGTGATCTATATAAGTTTCGGAAGTGCCGCGCGTATTAAAAGTTTAGAGTTTCAAGAAGTGGCCCACGGGTTGGCAAACGCGAGCTCACCGTTCCTGTGGGTGGTTCGACCAGGGATGGTCCTTGGTTCAGAATGGCTCGAGTCATTGCCAGAAAAGTTTCTAGAAATAGTGGGTGATAGGGGTCGTGTAGTGAAATGGTGTCCTCAACAAGAAGTATTAGCTCATCCAGCAACGGGGTGTTTTTGGACTCATAGTGGATGGAACTCAACATTGGAAAGCATTTGTGAAGGAGTTCCCATGATTTGTTCGCCTTGTTTTGCCGACCAACCAATCATTGCGCGATACGTGAGTGATGTTTGGAAGATCGGTGTTTTGTTGGAAGACGGGTTTGAGCGAGAGGGAATCGCGATCGCGATCAAACGAGTAATGATGGATGAGGAAGGAGAAGAAATATGCGAACGAATAGATCGTCTTAAGGAGAAAGTAAACATCTCACTTGATGAAGGTGGCTCTTCTAATAAGTCGTTAAAGAGTTTAGTTGATTATATTTTGTCGTTATAA

MDTDGRNTSLQSTHPPETRRRILFFPLPFQGHINPMFQLANILHTQGFKITIIHTQFNSPDHSTYPYFQFRSIIDRLSEVEHLFPTIRDPSYFIKYLNKNCEVSFRDCLIGLLDEEPVACLIADAMFYFTQAVADDLKLPRLVLRTSSLGCAIGYGALPFSSIGDGVNLPKQDPGYETPVREYPLIKVKDMLKVAVNPEGYGDLVTNMLKQMKASSGIIWNTFKELEEPELETINHDFRVPNFTLGPFHNYFPATSTSLIEQDRTILSWLDTKPPKSVIYISFGSAARIKSLEFQEVAHGLANASSPFLWVVRPGMVLGSEWLESLPEKFLEIVGDRGRVVKWCPQQEVLAHPATGCFWTHSGWNSTLESICEGVPMICSPCFADQPIIARYVSDVWKIGVLLEDGFEREGIAIAIKRVMMDEEGEEICERIDRLKEKVNISLDEGGSSNKSLKSLVDYILSL

SrUGT91D1-3

ATGGACGACCATAAGCAGCTTCATGTTGCGATGTTCCCATGGCTTGCTTTCGGTCACATTCTCCCATTCTTCGAACTCTCCAAATTCATAACCAAAAACGGTCACAAAGTTTCTTTTCTTTCCCCCACCGGAAACATACAACGTCTCCCTTCTTCTAATCTTTCGCCACTCATGAATCTTGTTAAACTCACACTTCCACGTGTTCAAGAGCTGCCCCAAAATGCATCCGCCACCACGGACCTCCATGCTGATGATGTCCAATATCTCAAACAAGCTTTTGATGGTCTTCAACCGGAGGTCACTCGATTTCTTGAACAAGAGTCGCCGGACTGGATTATTTATGATTTTACTCCCTATTGGTTGCCGGCGGTAGCCACTAGCCTTGGAATTTCACGAGGTTTTTTCTCAATTTTTAACGCATGGACCGTCTCTTTTTTCGGATCTTCTCCCGATGACATCATAAACGGTACAGACGATCGGAAAACAGCCGACGATTTCCTGACACCGCCGAAGTGGTTTCCGTTCCCAAGTAAAGTATGCTACCGGAAGCATGAGGCCAATTTGATATTTGCTGATAATATTTCTGTTAATTCTTCTGGTGTATCAGATTTATATCGTTTAGGAATGGTTATAAAGGGATCAGATTGTATGTTTATAAGACATTGCCATGAGTTCGAACCCCAATGGCTAACCCTTTTAGAAAAGCTGCATCAGCTACCGGTGGTTCCCGTGGGATTATTGCCACCCGAACCACCCACCAGCACCGGAGACCCATGGGTGACAATCAAGAAGTGGCTCGATGGTCAACCAATAGGGCATGTGGTGTACGTGGCATTTGGAAGTGAAGGTACGATGAGCCAAAGCGAGCTGGCTGAGTTAGCTCTGGGTCTCGAGCTCTCTGGGTTGCCATTCTTTTGGGTTCTTAGAAAACCGGTTGGCTCTGGTAACTCGGTGGAGTTGCCAGAGGGGTTCTTGGAACGAACTCGTGACCGTGGGTTGGTGTGGACGAGTTGGGTACCTCAGTTACAAATACTGAGCCATGAGTCGGTGTGTGGTTTCTTGACTCATTCTGGTTGGAGTTCATTTGTGGAAGCGATGATGTTCGGTCACCCTTTGATAATGCTACCGCTTTCGGTGGATCAAGGTCTAAATGCTCGAGTAATGGCGGATAATCAGGTGGGAATTGAGATACCAAGAAATGACGAAGATGGTTCATTCACCAAGGAGTCGGTGGCCAGATCATTGAGGTTGGTTTTAGTCGATGATGAAGGGAAGATCTACAAGGCGAAGGCGATGGAGTTGAGTCAACGATTCGGGGATAGTAAGCCGGAAAATAAGTATATAAACCCTTTTATAGACTATTTGGAACAAAAAGGTCGTGTGGTTGCTATTGAGCATGAGCTTTGA

MDDHKQLHVAMFPWLAFGHILPFFELSKFITKNGHKVSFLSPTGNIQRLPSSNLSPLMNLVKLTLPRVQELPQNASATTDLHADDVQYLKQAFDGLQPEVTRFLEQESPDWIIYDFTPYWLPAVATSLGISRGFFSIFNAWTVSFFGSSPDDIINGTDDRKTADDFLTPPKWFPFPSKVCYRKHEANLIFADNISVNSSGVSDLYRLGMVIKGSDCMFIRHCHEFEPQWLTLLEKLHQLPVVPVGLLPPEPPTSTGDPWVTIKKWLDGQPIGHVVYVAFGSEGTMSQSELAELALGLELSGLPFFWVLRKPVGSGNSVELPEGFLERTRDRGLVWTSWVPQLQILSHESVCGFLTHSGWSSFVEAMMFGHPLIMLPLSVDQGLNARVMADNQVGIEIPRNDEDGSFTKESVARSLRLVLVDDEGKIYKAKAMELSQRFGDSKPENKYINPFIDYLEQKGRVVAIEHEL

SrUGT91D3

ATGGCTAACACCGAGTCCTTGAACGACCATAAGCAGCTTCATGTCGCGATGTTCCCATGGCTTGCTTTTGGTCACATCATCCCTTTCCTTGAACTCTCCAAATTCATAGCTGAAAAGGGTCACAAAGTCTCGTTTCTTTCAACCACTAGAAACATTCAACGTCTCCCTACAATCCCTTCTAACCTCTCGCCACTAATAAATCTTGTTAAACTCACACTTCCACGTGTTCAAGAGCTGCCCGAAGATGCAGAGGCCACTATCGACGTTCACACTCAAGATGTTCATCATCTTAAAAAGGCTTTCGATGGTCTTCAGCCGGAGGTCACTCGGTTTCTTGAAAAAGAGTCTCCAGACTGGATTATTTATGATTTTGCTCCGTATTGGTTGCCGTCCGTCGCAGCTGGACTACGGACCTCGCGAGCCTTTTACTCGAATTTTAACGCATGGTTCATTGCTTTTCTCGGAGCGTCGGCTGACGACTTGATAAGTGGTTCCGGTTATGATCATCGAACGAGGGTTGAGAATTTTATGACACCGCCGAAGTGGGTTCCGTTTCCGACAAACGTGTGCTACCGGAAGTATGAGGCGGTTCGGATGGTAGGGAATACTTCGGCTAATGCTTCTGGAATATCAAGTGTGTATCGTGTGGGAATGATTTTGAAAGGATCTGACTGTATGTTTATAAGACATAGTTATGAGTTCGAACCTCAATGGTTAACCCTTTTAGAGAAGCTCCATCACCTACCGGTGGTTCCTGTCGGATTATTGCCACCAGAAAAACCCACCAACATCGAAGACGGGAATGATAAGACGTGTGACACAGTCAAGAAGTGGCTCGATGGTCAACAAAAAGGTCATGTGGTGTACGTGGCATTTGGAAGTGAGGTTACACTGAGCAGAAGCGAGCTGGCGGAGTTAGCTTTGGGCCTCGAGCTCTCCGGGTTGCCATTCTTTTGGGCTCTTAGAAAACCGGTAGCTTCCACCGAGTCAAAGTTGGTGGAGTTGCCAGACGGGTTCTTGGATCGAACTAGTGACCGTGGGTTGGTGTGGACGAGTTGGGCACCTCAGCTACAAATACTTAGCCATGAGTCAGTGGGTGGTTTCTTGACTCACTGTGGTTGGAGTTCAATTGTGGAAGCGATGATGTTCGGTCACCCTCTAATAATGCTACCGTGTTTGGCGGACCAAGGTCTGAATGCTCGAGTAATGGTGGACAAAAAGGTGGGAATTGAGATACCAAGAAATGGCGAAGATGGCTCCTTCAACAAGGAGTCAGTCGCAAGATCAGTGCGGGCAGTTGTAGCTGATGATGAAGGGAAGATTTACAAGGAAAATGCGATGGAGTTAAGTAGATTGTTCGGAGACACTAAGATGGGAAAGAAGTATATAAACCATTTCATAGATTATTTGGAGAAGACACGACGTACGTTAACCGTATGA

MANTESLNDHKQLHVAMFPWLAFGHIIPFLELSKFIAEKGHKVSFLSTTRNIQRLPTIPSNLSPLINLVKLTLPRVQELPEDAEATIDVHTQDVHHLKKAFDGLQPEVTRFLEKESPDWIIYDFAPYWLPSVAAGLRTSRAFYSNFNAWFIAFLGASADDLISGSGYDHRTRVENFMTPPKWVPFPTNVCYRKYEAVRMVGNTSANASGISSVYRVGMILKGSDCMFIRHSYEFEPQWLTLLEKLHHLPVVPVGLLPPEKPTNIEDGNDKTCDTVKKWLDGQQKGHVVYVAFGSEVTLSRSELAELALGLELSGLPFFWALRKPVASTESKLVELPDGFLDRTSDRGLVWTSWAPQLQILSHESVGGFLTHCGWSSIVEAMMFGHPLIMLPCLADQGLNARVMVDKKVGIEIPRNGEDGSFNKESVARSVRAVVADDEGKIYKENAMELSRLFGDTKMGKKYINHFIDYLEKTRRTLTV

SrUGT85B1-2

ATGGGTTCGGTTCAAGAGAAAAAGGCGCCACATGTTGTGTGCATACCGGCACCACTTCAAGGTCACATTAACCCGATGCTAAAACTAGCCAAAATCCTGCACTCCAAAGGCTTTCTTATCACCTTTGTCAACACCGAGTTTAACCACCAACGGCTCGTTAGGTCACAGGGGGTTGAAGCCCTACACGGGCTCCCAACCTTCCGGTTTGAGACCATCCCAGATGGTCTACCGCCACCTGAAAACAAAGATGCCACCCAAGATATCCCGACTCTAGCCAAGTCGGTTGATGAAAACTTTTTGGGTCCGTTTAAAAGTCTTGTAACCAAAGTGGGTGCTTTGTATGCACCCGTGACTTGTATCGTGTCTGACATGCTTATGTGCTTCACTCTTGATGCCGGTGCTGAATTGGATATCCCGGTGATACTCCATTGGACCAGTGGTACTGGTTCTTTGATATGTTACAATGAATATCCTAATCTATTGGAAAGCAAATTGATGCCCCTCAAAGATGCAAGTTATTTAGTGAATGGTTACTTAGATACGATTGTAGATTCTATCCCCATTTTGCATGGCATACGTTTAAGAGATTTCCCTCCCTTCATTAGAAAGATCTTTCCTGGTGATGAGTTCATGGTTCAATTTTTGACTTCACAAGTAAACAAAGCAAAAAACGGATCTTCTGCTATCATTTTCAACACTTTTGATGAACTAGATCGTGATGTTTTAGACACACTCGCTTCAATGTATCCTCCATGTTATGGAATTGGTCCGTTACATCTACTAGAGAAACATGTTACCGATAAATCTCTTGATTTCGTGAAATCAAACCTTTGGAAAGAAGAACCCGAATGTTTAAAATGGTTAGATACACAAGCTCCATCATCAGTCATTTATGTGAATTTTGGTAGCATTACAGTAATGACACCTCAACAACTAGTCGAGTTTTGTTGGGGACTCGCAAAGAGCAACTATCCGTTCTTATGGATAATACGACCTGACCTTGTGATTGGTGATTCCGCGATGCTTCCACCCGAGTTTGTGAAGGAAACAAGTGATAGAGGGATGCTGGTTGGATGGTGTCCTCAAGAAGAAGTTTTGAATCACCCGTCAATTGGAGGGTTTTTAACGCACAGTGGATGGAATTCAACGCTTGAAAGTATTTCGAGTGGTGTGCCGATGATTTGTTGGCCGTTTTTTGCGGATCAACAAACGAATTGCTGGTGGAGTTGCAACAAATGGGGTGTTTCCATGGAGATTGATAATAATGTAAAGAGTGATGAAGTTTCAAAGCTTGTGATTGAATTAATGGATGGAGAAAAAGGAAAGGAAATTAAAAAGAATGCCATTGACTTGAAGAATAAAGCTGAGGATGCATGTACCTCTCCTCTTGGTTCATCAGTGGTTAATTTGGAGAAAGTGGTTCAACTGATTCATACATTTTCAAAATAA

MGSVQEKKAPHVVCIPAPLQGHINPMLKLAKILHSKGFLITFVNTEFNHQRLVRSQGVEALHGLPTFRFETIPDGLPPPENKDATQDIPTLAKSVDENFLGPFKSLVTKVGALYAPVTCIVSDMLMCFTLDAGAELDIPVILHWTSGTGSLICYNEYPNLLESKLMPLKDASYLVNGYLDTIVDSIPILHGIRLRDFPPFIRKIFPGDEFMVQFLTSQVNKAKNGSSAIIFNTFDELDRDVLDTLASMYPPCYGIGPLHLLEKHVTDKSLDFVKSNLWKEEPECLKWLDTQAPSSVIYVNFGSITVMTPQQLVEFCWGLAKSNYPFLWIIRPDLVIGDSAMLPPEFVKETSDRGMLVGWCPQEEVLNHPSIGGFLTHSGWNSTLESISSGVPMICWPFFADQQTNCWWSCNKWGVSMEIDNNVKSDEVSKLVIELMDGEKGKEIKKNAIDLKNKAEDACTSPLGSSVVNLEKVVQLIHTFSK

SrUGT75E2

ATGACCAAAGTTATGGCTCAAACCCAACCTCACTTCCTCGTATTAACCTTCCCAGCCCAAGGTCACATCAACCCAGCTTTCCAGTTCGCTAAACGACTCATTCGGTTGGGTGTCAAAGTCACCTTCACCACCACCATCTCCGCCTACAATAAAATCACCAAAGTTGGCCGAATTCCAGAGTCTTTCAATCTTGTAGCTTTTTCCGACGGATTTGATGACGGTTACAAGGCCGGAATCGATGACACCACAAAATACATGACCCAGTTAAGGACCGGAGGAATCCAAAGCTTGAAAGAAACCATTCTTTCTAACGCCGAAAAACACACTCCGATCACTTGTTTGGTTTACACCCTCCTCCTTCCATGGGCTGCCAACGTCGCGCATGGGCTCAACGTACCATCGGCTCTACTTTGGATCCAACCTGCGTCCGTTATGCGCGTATACTACTATTACTTCAACGGGTACGATAAACTTATTGGCGACGATTGTAGTGATCCATCATGGTCCATCGAGTTACCAGGGTTACCGTTGCTCAAAAGCCGTGATCTACCGTCGTTTTGTCAACCGACAAACACTTACAACTTCGCATTGCCTTTGTTCAAAGAGCAATTTGATATGTTGGCATCCGAAGACAAGCCTACGATACTCGTTAACAGCTTTGATGCGTTGGAACAAGAGGCGTTGAAGGAGATTGATGGCAAGCTTAGAATGGTCGCGGTTGGACCATTGATTCCTTCGGCTTTCTTGGATGGTAAGGATCCGTCGGACAAAAGTTTTGGTGGAGATTTGTTTGAGACCACGAAAGATTATGTCGAATGGATGAACACAAAGCCTCAAGGGTCCGTTGTGTATATATCTTTTGGTAGCATCATAATGTTGTCAAAGAAACAAAAGGAGGAAATGGCTCATGGTTTGTTAGAAATTGGGAGGCCGTTTTTATGGGTTATTAGAGAGAAAGATGGAAACATGATAGGAGACAAAACCGACGACGAAGAAGACGAATTGATGTGTATGGAGAAGCTTGAACAATTAGGTTTGATAGTCCCATGGTGCAGCCAACTAGAGGTGTTGTCACACCCGTCTTTGGGTTGTTTCGTGAGTCATTGTGGATGGAATTCGACGCTAGAGAGTATCGCATGTGGGGTCCCAGTTGTAGCGTTTCCTCATTGGACGGATCAGTCGACGAACGCGAAGCTTCTAGAAGATGTATGGGGAACAGGGACACGGGTGACCGCGAACGAAGACGGAGTTGTTTTAGGTAATGAGATAAGAAGGTGCATAGAAATGGTGATGGGTGGACATGAAAGAGGGGAAACAATGAGAAAGAATGCTAATAAGTTGAAGGATTTGGCTAGAGAGGCTATGAAAGAGAGTGGATCTTCGTATATGAATCTCAAGGATTTTGTTGAACGAGTTGATGGAAGTTATTCGACTCGTGACAAAGAGGTCATGATCTCGAGTGAAGAAGTGAAAGATCTAGAATCCAAGTTGGAGTCTGTTCTATGA

MTKVMAQTQPHFLVLTFPAQGHINPAFQFAKRLIRLGVKVTFTTTISAYNKITKVGRIPESFNLVAFSDGFDDGYKAGIDDTTKYMTQLRTGGIQSLKETILSNAEKHTPITCLVYTLLLPWAANVAHGLNVPSALLWIQPASVMRVYYYYFNGYDKLIGDDCSDPSWSIELPGLPLLKSRDLPSFCQPTNTYNFALPLFKEQFDMLASEDKPTILVNSFDALEQEALKEIDGKLRMVAVGPLIPSAFLDGKDPSDKSFGGDLFETTKDYVEWMNTKPQGSVVYISFGSIIMLSKKQKEEMAHGLLEIGRPFLWVIREKDGNMIGDKTDDEEDELMCMEKLEQLGLIVPWCSQLEVLSHPSLGCFVSHCGWNSTLESIACGVPVVAFPHWTDQSTNAKLLEDVWGTGTRVTANEDGVVLGNEIRRCIEMVMGGHERGETMRKNANKLKDLAREAMKESGSSYMNLKDFVERVDGSYSTRDKEVMISSEEVKDLESKLESVL

SrUGT85B2

ATGGGTTCGAAACACGAAAACAAACCACATGCATTATGCATACCAGCTCCAGTGCAAGGTCACATTAACCCAATGTTAAAACTAGCCAAAATCCTACATTCCAAAGGCTTCATTATCACCTTCGTCAACACCGAATTCAACCACCAACGTCTCATGAGAGCTCAAGGTTCTGAAGCGGTTCGTGGCCTCCCATCCTTTCAGTTCGAGACCATTCCTGACGGTCTTCCACCGCCAAAAAACCCTGATGCGACACAAGAGGTCCCTTCTCTGGCACGAGCCATTGAAGATAATTTTCTGGGTCCGTTTAAGACCATGGTCACCAAAGTTAGCGCGTCTTATTCACCAGTAACTTGTATAGTAGCCGATGTGCTTATGGGTTTCACCCATGTTGTTGCCTCTGAGTTGGGTATCCCGGTGGTTGTCTTATGGACGAGTGGAGCCGGTTCGTTAATATGTGTACATCAGTATCCTAATCTTTTGGAGAAGGGATTGATGCCCCTTAAAGATTCAAGTTATTTAGTTAATGGTTATTTGGATATGGTTCTTGATTTTATCCCCGCAATGAGTGGAATACGTCTAAAAGACATTCCTCCTTTCATTCGACATATCAACCCTGGCGATGAATACGTCGCTCAATTTCTGTGTTCACAAATAGAGAGAGCAAAAAAAGCTTCCGCTATCATTTTCAACACTTTTGATGAACTCGATCGTGACATTTTAGACACCATCTCTTTAAAGTTCCCTCCCTGTTATGGAATTGGACCTTTAAATCTACTTGAAAACAAGATTGAAGATACAACTCTAGCATGCATCAGATCAAACCTTTGGAAAGAAGAAGACGAATGTTTAAAATGGCTAGACTCAAAAGAAAAATCATCAGTTATCTATGTGAACTTTGGTAGTATCACAGTGATGACATCTCAACAACTAGTCGAGTTTGGATGGGGGCTCGCGAAGAGCCAATATTCATTCTTGTGGATTATACGTCCAGACCTCGTGACTGGTGATGATCAGTCGTCTGCTGGTCTTCCACCTGAGTTGTTGACGGAGATAAGCGATAGAGGGTTGTTGGTAGGTTGGTGTCCCCAAGAACAAGTTCTAAACCACTCGTCAATAGGAGGGTTTTTAACGCATAGTGGATGGAATTCGACAATTGAAAGCATTTCGTGTGGGGTGCCAATGGTTTGTTGGCCGTATTTTGGCGACCAACAAACGAATTGTTGGTTGGCTTGCAACAAGTGGGGTGTTGCGATGGAGATTGACAATAATGTAAAGAGTGATGAGGTTCAGAAGTTGGTGATTGAGTTGATGAAAGGAGAAAAAGGAAATTCTATAAGGAAGAAAGTTGCTGAATTGAAGAACAAAGCTGAGCAAGCATGTGTCTTTCCTTCTGGTTCATCAATAGCTAATTTGGAGAAGATCATTCAACTCATGCAAACTCCATCAATATGA

MGSKHENKPHALCIPAPVQGHINPMLKLAKILHSKGFIITFVNTEFNHQRLMRAQGSEAVRGLPSFQFETIPDGLPPPKNPDATQEVPSLARAIEDNFLGPFKTMVTKVSASYSPVTCIVADVLMGFTHVVASELGIPVVVLWTSGAGSLICVHQYPNLLEKGLMPLKDSSYLVNGYLDMVLDFIPAMSGIRLKDIPPFIRHINPGDEYVAQFLCSQIERAKKASAIIFNTFDELDRDILDTISLKFPPCYGIGPLNLLENKIEDTTLACIRSNLWKEEDECLKWLDSKEKSSVIYVNFGSITVMTSQQLVEFGWGLAKSQYSFLWIIRPDLVTGDDQSSAGLPPELLTEISDRGLLVGWCPQEQVLNHSSIGGFLTHSGWNSTIESISCGVPMVCWPYFGDQQTNCWLACNKWGVAMEIDNNVKSDEVQKLVIELMKGEKGNSIRKKVAELKNKAEQACVFPSGSSIANLEKIIQLMQTPSI

SrUGT91D1-1

ATGTTCCCATGGCTTGCTTTCGGTCACATTCTCCCATTCTTCGAACTCTCCAAATTCATAACCAAAAACGGTCACAAAGTTTCTTTTCTTTCCCCCACCGGAAACATACAACGTCTCCCTTCTTCTAATCTTTCGCCACTCATGAATCTTGTTAAACTCACACTTCCACGTGTTCAAGAGCTGCCCCAAAATGCATCCGCCACCACGGACCTCCATGCTGATGATGTCCAATATCTCAAACAAGCTTTTGATGGTCTTCAACCGGAGGTCACTCGATTTCTTGAACAAGAGTCGCCGGACTGGATTATTTATGATTTTGCTCCCTATTGGTTGCCGGCGGTAGCCACTAGCCTTGGAATTTCACGAGGTTTTTTCTCAATCTATAACGCATGGACCGTCTCTTTTATCGGATCGTCTTCCGATAACATGATAAACGGTACAGACAATCGGAAAACACCCGACGATTTCTTGACACCGCCGAAGTGGGTTCCGTTTCCAAGCAAAGTATGCTACCGGAAGCATGAGGCCAATTCGATATTTGCTGATAATTTTTCTATTAATTCTTCTGGGGTTTCAGATATATATCGTGCTGGAATGGTTATAAAGGGATCAGATTGTATGTTTATAAGACATTGCCATGAGTTCGAACCCCAATGGCTAACCCTTTTAGAAAAGCTGCATCACCTACCAGTGGTTCCCGTGGGATTATTGCCACCCGAACCACCCACCAGCACCGGAGACCCATGGGTGACAATCAAGAAGTGGCTCGATGGTCAACCAATAGGGCATGTGGTGTACGTGGCATTTGGAAGTGAAGGTACGATGAGCCAAAGCGAGCTGGCTGAGTTAGCTCTGGGCCTCGAGCTCTCCGGGTTGCCATTCTTTTGGGTTCTTAGAAAACCGGTTGGCTCTGGTAACTCGGTGGAGTTGCCAGAGGGGTTCTTGGAACGAACTCGTGACCGTGGGTTGGTGTGGACGAGTTGGGTACCTCAGTTACAAATACTGAGCCATGAGTCGGTGTGTGGTTTCTTGACTCATTCTGGTTGGAGTTCATTTGTGGAAGCGATGATGTTCGGTCACCCTTTGATAATGCTACCGCTTTCGGTGGATCAAGGTCTAAATGCTCGAGTAATGGCGGATAATCAGGTGGGAATTGAGATACCAAGAAATGACGAAGATGGTTCATTCACCAAGGAGTCGGTGGCCAGATCATTGAGGTTGGTTTTAGTCGATGATGAAGGGAAGATCTACAAGGCGAAGGCGATGGAGTTGAGTCAACGATTCGGGGATAGTAAGCCGGAAAATAAGTATATAAACCCTTTTATAGACTATTTGGAACAAAAAGGTCGTGTGGTTGCTATTGAGCATGAGCTTTGA

MFPWLAFGHILPFFELSKFITKNGHKVSFLSPTGNIQRLPSSNLSPLMNLVKLTLPRVQELPQNASATTDLHADDVQYLKQAFDGLQPEVTRFLEQESPDWIIYDFAPYWLPAVATSLGISRGFFSIYNAWTVSFIGSSSDNMINGTDNRKTPDDFLTPPKWVPFPSKVCYRKHEANSIFADNFSINSSGVSDIYRAGMVIKGSDCMFIRHCHEFEPQWLTLLEKLHHLPVVPVGLLPPEPPTSTGDPWVTIKKWLDGQPIGHVVYVAFGSEGTMSQSELAELALGLELSGLPFFWVLRKPVGSGNSVELPEGFLERTRDRGLVWTSWVPQLQILSHESVCGFLTHSGWSSFVEAMMFGHPLIMLPLSVDQGLNARVMADNQVGIEIPRNDEDGSFTKESVARSLRLVLVDDEGKIYKAKAMELSQRFGDSKPENKYINPFIDYLEQKGRVVAIEHEL

SrUGT73C5

ATGGCTTTAGATGAGTCACATGAACCCAACCAACTTCACTTTCTTGTTATACCCTTAGGATCTCCAGGCCACTATATCCCAACCATTGATTTAGCCAAATTACTAGCTCAACATGGTGTTAGAGTCACAATAATCACCACACCGGTCAACGCAATCAGATTCGGGTCAATCCTTGATCAAGCAATCAAATCGGGTCTTCCCATTAATTTTCTTGAATTTCAGTTACCATATCTGAAGTTTGGTATTCCAGAAGGTTGTGAATGCATGGATGATCTTCCTAATATTGGATTAGTCAATGATTTTTTTCTTGCCCATAGTTCACTTCAACAAGAAGTTGAACAATATATTGAAAAGCTTGATTCTAAACCAAGTTGCATACTTTCAAGCACATATATTCTTTGGACAGATGAAACATCAAAAAAATTTAAGATTCCAAAGATTGTGTTTGATGGAATGAATTGCTTCACTCAAATGTGTAACCACGTTTTATACCTCTCAAAGGTATATGAAAGTGTCAACGAGTCGGATTATTTTGTTTTGCCCGGGTTGCCTGATCATATTGAACTAACAAGATCGCAACTAGCCTTCGTATTCAATTCAGGGTCCAAAGACGTAAAGGATTATAGGGAAAAGCTTCGGGTATCGGAGTCCGAAGCGTTTGGGATAGTTATAAACAGTTTTCAGGAGTTGGAACAAGAATATGTTGATGCATATCAAAAAGTCAAAGAAGATAAAGCTTGGTGCATAGGGCCATTATCTCTATGCCACAAGGATGCATCCGAGAAGGTCCAAAGAGGTAACAAGTCCTCAATTGACAAAAATGAATGCATCAAGTGGCTAGATTCTCAAGAAAACGAATCGGTGATATACACATGTTTAGGTAGCATTAGTCGCCTTGAGCCTACACAACTCATAGAGCTCGCTTTAGGTCTAGAGTCATCAAAAAAACCATTCATTTGGGTGGTTCGAGCTGGTCATAAGACTGAGAAGATAGAAAAGTGGATAGATGAAGAGGGGTTTGAACAAAGAACCAAAGATAGAGGTCTACTGATCCGCGGGTGGGCTCCACAACTGCTAGTGTTGTCACACCCTGCAATTGGCGCGTTTTTGACTCATTGCGGTTGGAACTCGGCTCTAGAAGGGATATCTGCTGGTGTCCCTATGGTAACATGGCCTCAGTTTCAAGAACAATTTTACAATGAGAAGTTACTTGTACAAGTATTAAAAATTGGCGTCAGTGTTGGCGCGCAAAAAGTTGTGCATTGGGGTGAAGAAGAAAAGTCGGGAGTGGTAGTAAAGAGTGAGGAATTTATAAAGGCTATAGAGCTGGTGATGGAAGATGGGAAAGAAAGTGAAGATAGAAGAAAGAGAGCTAAAGAACTTGGTAAGATGGCTAATGAAGCAATAGAAGATGGAGGATCTTCTCACCGGAATATGACACGATTAATCCAAGATATTAGGAACCTATCATGTGCAAACAATTCAAGCTAA

MALDESHEPNQLHFLVIPLGSPGHYIPTIDLAKLLAQHGVRVTIITTPVNAIRFGSILDQAIKSGLPINFLEFQLPYLKFGIPEGCECMDDLPNIGLVNDFFLAHSSLQQEVEQYIEKLDSKPSCILSSTYILWTDETSKKFKIPKIVFDGMNCFTQMCNHVLYLSKVYESVNESDYFVLPGLPDHIELTRSQLAFVFNSGSKDVKDYREKLRVSESEAFGIVINSFQELEQEYVDAYQKVKEDKAWCIGPLSLCHKDASEKVQRGNKSSIDKNECIKWLDSQENESVIYTCLGSISRLEPTQLIELALGLESSKKPFIWVVRAGHKTEKIEKWIDEEGFEQRTKDRGLLIRGWAPQLLVLSHPAIGAFLTHCGWNSALEGISAGVPMVTWPQFQEQFYNEKLLVQVLKIGVSVGAQKVVHWGEEEKSGVVVKSEEFIKAIELVMEDGKESEDRRKRAKELGKMANEAIEDGGSSHRNMTRLIQDIRNLSCANNSS

SrUGT79A2

ATGTCTTTGAAGGGAAATGATAAAGAACTACACTTAGTAATGTTCCCTTTCTTTGCATTTGGTCACATAACTCCTTTTGTGCAATTATCCAACAAGATATCATCATTATATCCCGGTGTCAAGATTACTTTCTTAGCGGCTTCAGCCAGTGTCAGTCGTATTGAAACCATGCTCAACCCCACCACCAACACCAAAGTCATCCCTCTAACTCTACCACGTGTCGATGGTCTCCCTGAAGGGGTGGAAAACACCGCCGACGCATCACCAGCAACCATTGGACTTCTCATAGTTGCATTAGACCTGATGCAACCCCAGATCAAAACTTTACTAGCTAATCTCAAACCTGATTTCGTAATCTTTGACTTTGTGCATTGGTGGCTACCGGAAATAGCGTCTGAGCTCGGGATAAAAACCATCTATTTCTCTGTCTATATGGCAAATGTCGTCATGCCTTCGACCTCCAAGTTAACCGGCAATAAGCCATCAACTGTAGAAGACATCAAAGCTCTGCAACAATCCGACGGCATACCTGTAAAGACATTTGAAGCTATACGTTTGATGAACGTCTTCAAGAGCTTCCATGGACCACTAAGCTTATCTGATCGGATGGATAAATGCATCAATGGATGCAATCTTATGCTCATCAAGTCATGTAGGGAGATGGAAGGATCGCGCATCGATGACGTCAGGAAACAATCTACGAGACCAGTTTTTCTAATCGGTCCGGTGGTTCCCGAGCCACACTCCGGTGAGTTAGATGAAACATGGGCCAATTGGTTGAACCGGTTCCCGGCTAAATCGGTGATATATTGTTCTTTCGGGAGTGAAACTTTTCTGACCGACGATCAGATTAGGGAATTAGCTTTAGGGTTGGAACTCACCGGACTTCCATTCTTCCTGGTGTTGAATTTTCCGGCGAATGTTGATAAATCTGCAGAACTGAAAAGAACACTACCAGATGGGTTTCTTGAAAGAGTGAAGGATAAAGGGATTGTACACTCAGGGTGGGTGCAACAACGACACATATTGGCGCACGATAGTGTGGGGTGTTATGTGTTTCATGCTGGTTATGGTTCGGTGATTGAAGGTCTGGTTAACGACTGTCAGCTGGTGATGCTGCCAATGAAGGTTGACCAGTTTACGAACTCGAAAGTGATTGCTTTGGAGTTGAAGGCTGGAGTTGAAGTAAACAGGAGAGATGAAGATGGGTATTTTGGGAAAGATGATGTGTTTGAAGCTGTGGAGAGTGTAATGATGGATACTGAAAACGAACCGGCGAAATCCATTAGAGAAAATCATAGAAAACTGAAGGAATTTTTGCAAAATGATGAGATTCAGAAGAAGTATATTGCAGATTTTGTTGAGAACTTGAAGGCTCTTTGA

MSLKGNDKELHLVMFPFFAFGHITPFVQLSNKISSLYPGVKITFLAASASVSRIETMLNPTTNTKVIPLTLPRVDGLPEGVENTADASPATIGLLIVALDLMQPQIKTLLANLKPDFVIFDFVHWWLPEIASELGIKTIYFSVYMANVVMPSTSKLTGNKPSTVEDIKALQQSDGIPVKTFEAIRLMNVFKSFHGPLSLSDRMDKCINGCNLMLIKSCREMEGSRIDDVRKQSTRPVFLIGPVVPEPHSGELDETWANWLNRFPAKSVIYCSFGSETFLTDDQIRELALGLELTGLPFFLVLNFPANVDKSAELKRTLPDGFLERVKDKGIVHSGWVQQRHILAHDSVGCYVFHAGYGSVIEGLVNDCQLVMLPMKVDQFTNSKVIALELKAGVEVNRRDEDGYFGKDDVFEAVESVMMDTENEPAKSIRENHRKLKEFLQNDEIQKKYIADFVENLKAL

SrUGT79A3

ATGACTTTAACCTGCAAACCTAAGGAACTACACTTAGTGATGCTCCCTTTTTTTGCATTTGGTCACATTAGTCCTTTTGTTCAGTTAACCAACAAGTTATCATCGTATCTCGGTGTCAAGATTTCTTTCTTGGCTGCTTCCGCTAGTGTCAGCCGTATTGAAACCATGCTCAACTCTACCACCAACACCAAAGTCATCCCTCTAACTCTACCGCGTGTCGATGGTCTCCCTGAAGGCGTTGAAAACACCTCCGACACCTCACCAGCCACCATCGAGCTTCTCAAAGTCGCATTAGACCTCATGCGACCCCAAATTAAAACCGTACTAGCTAATCTTAAACCTAATTTTGTCTTCTTTGACTTTGCGCAATGGTGGTTGCCCGAAATGGCGTCTGAACTCGGCATAAAAACAGTATTTTTTTCTGTTTTTATGCCGAGCAACTTGGCATTTGTTGCCACGTGGTTCACCCACGATAAGGTCCCAACTATAGAAGTAATGAAGAAGCCTTCATCCGTGTTCCCAGATCTACAACTACCCGAAGCCATAACTTTAAAGACTTTTGAAGCGCTAGATTTCATGTATATCTTCAAGAGCTTTCATGGCACACTAAGTGTATTCGATCGGTTGATGAAATGCTTCAATGGATGCAATGCTGTACTCATCAAGTCATGTAGAGAAATGGAAGCACCGTACATCGACTACCTTAGCAACCAAGTTAAAAAGCCAGTTCTTCTAATCGGTCCGGTGGTTCCTGAGCCACACTCCGGCGAGTTAGATGAAACATGGGCCAACTGGTTGAGCCAATTTCCGGCTAAATCGGTTATATATTGTTCTTTCGGGAGTGAAACGTTTCTAACCGACGATCAAATTAGGGAATTAGCTTTAGGGTTGGAACTCACCGGACTTCCATTCTTCCTGGTGTTGAATTTTCCGGCGAATGTTGATAAATCTGCAGAACTGAAAAGAACACTACCTGATGGGTTTCTTAAAAGAGTGAAGGATAAAGGGATTGTACACTCAGGGTGGGTGCAACAACGACACATTTTGGCGCACGTTAGTGTGGGGTGTTATGTGTTTCATGCTGGTTTTAGCTCAGTGGTTGAAGGTCTGATTAATGATTGTCAGCTGGTGATGCTGCCATTAAAAGGAGATCAACTTACGAATTCTAAAGTGATTGCTTCAGATTGGAAAGCTGGAGTTGAAGTAAACAGGAGAGATGAAGATGGGTATTTTGGGAAAGATGATGTTTTTGAAGCTGTGAAGAGTGTTATGATGGAGACTGAAAAAGAACCAGCAAAATCTATAAGAGAAAATCAAAAGAAATGGAAAGAGTTTTTGCAGAACGATGAGATACATAGCAAGTATATTGCAGATTTTGTTGAGAACTTGAAGGCTCTTTCATAA

MTLTCKPKELHLVMLPFFAFGHISPFVQLTNKLSSYLGVKISFLAASASVSRIETMLNSTTNTKVIPLTLPRVDGLPEGVENTSDTSPATIELLKVALDLMRPQIKTVLANLKPNFVFFDFAQWWLPEMASELGIKTVFFSVFMPSNLAFVATWFTHDKVPTIEVMKKPSSVFPDLQLPEAITLKTFEALDFMYIFKSFHGTLSVFDRLMKCFNGCNAVLIKSCREMEAPYIDYLSNQVKKPVLLIGPVVPEPHSGELDETWANWLSQFPAKSVIYCSFGSETFLTDDQIRELALGLELTGLPFFLVLNFPANVDKSAELKRTLPDGFLKRVKDKGIVHSGWVQQRHILAHVSVGCYVFHAGFSSVVEGLINDCQLVMLPLKGDQLTNSKVIASDWKAGVEVNRRDEDGYFGKDDVFEAVKSVMMETEKEPAKSIRENQKKWKEFLQNDEIHSKYIADFVENLKALS

SrUGT85B3

ATGGATTCGAAACAAGAAAAAAAGCCACATGCATTGTGCATACCAACCCCCGTACAAGGTCACATCAGCCCGATGTTAAAGCTAGCCAAAATCCTTCATTCCAAAGGCTTTCTTATAACCTTCGTCAACACCGAATTTAACCACCAACGTCTAGTGAGAACTCACGGCTCAACCGCCGTCACTGGCCTCCCATCGTTCCGGTTCGAGACCATTCCCGACGGTCTCCCACCGCCACAAAACCTTGATGCGACTCAAGACGTCCCTTCTCTGGCTCGAGCCATTGTTGAAAATTGTGCGGGTCCGTTTAAAACTTTAATCGACAAAGTTAGCGCGTCTTATTCACCGGTAACTTGTATAGTAGCTGATGTGTTTATGGGTTTCACTCACGCTGTTGGCTCTGAGGTTGGTATTCCGGTGTTTGTGTTTTGGACAAGTGGAGCTGGTTCTTTATTATGTTTCGATCGGTATCCATATCTTTTGGAGAAGGGATTGATGCCTCTTAAAGATTCAAGTTATTTAGAAAACGGTTATTTGGATACCGTTCTAGATTGTATGCCTGTCATGCATGGTATACGTCTAAAAGACATTCCTCCTTGGAATAGATATATCAACCCGGGTGATGAATACATGGTTCAGTTTGTCTGTTCACAAGTAGAGAGAGCAAAATTGGCTTATGCAGCTATTTTCAATACTTTTGATGAACTCGATCGTGACATTTTAGACACCATCTCTTCAAAGTTTCCTCCTTGTTATGGGATTGGCCCCTTACATCTACTCGAGAACAAGATTGTAGACAAAACTGTTGCACCCTTCAAATCAAACCTCTGGAAAGAAGATTATGAATGCGTAAGATGGTTAGACTCAAAAGAACCATTGTCGGTTATTTATGTGAACTTTGGTAGTATTACAGTGATGACATCTCAACAACTAGTCGAGTTTGGATGGGGAGTCGCGAAAAGTAATTATTCATTCTTGTGGATAATACGTCCTGACCTTGTAACTGGTGAGTCTGCTGTTCTTCCGCCTGAGTTGTTGGCGGAGATAAGCAACAGAGGATTCTTGGCTGGTTGGTGTCCCCAAGAACAAGTTTTAAACCATCCGTCAATAGGAGGGTTTTTAACGCACAGTGGATGGAATTCGACGATTGAAAGTATTTCTGGTGGAGTCCCAATGATTTCTTGGCCGTTTTTTGGCGACCAACAGCCAAATTGTTGGTTGGGTTGCAACAAATGGGGTATCTCCATGGAGATTGACAATAATGTAAAGAGTGATGAAGTTGAAAAGCTTGTGATTGAGTTGATGAAAGGAGAGAAAGGGAATTCGATGAGGAAGAAGTCTATTGAATTAAAGAAGAAGGCAGAGGAAGCATGCGACTTTCCTTCCGGTTCATCAGTGGCTAATTTGGAGAAGATCATTCATCTCATGAAAACATTTTCAAAGTGA

MDSKQEKKPHALCIPTPVQGHISPMLKLAKILHSKGFLITFVNTEFNHQRLVRTHGSTAVTGLPSFRFETIPDGLPPPQNLDATQDVPSLARAIVENCAGPFKTLIDKVSASYSPVTCIVADVFMGFTHAVGSEVGIPVFVFWTSGAGSLLCFDRYPYLLEKGLMPLKDSSYLENGYLDTVLDCMPVMHGIRLKDIPPWNRYINPGDEYMVQFVCSQVERAKLAYAAIFNTFDELDRDILDTISSKFPPCYGIGPLHLLENKIVDKTVAPFKSNLWKEDYECVRWLDSKEPLSVIYVNFGSITVMTSQQLVEFGWGVAKSNYSFLWIIRPDLVTGESAVLPPELLAEISNRGFLAGWCPQEQVLNHPSIGGFLTHSGWNSTIESISGGVPMISWPFFGDQQPNCWLGCNKWGISMEIDNNVKSDEVEKLVIELMKGEKGNSMRKKSIELKKKAEEACDFPSGSSVANLEKIIHLMKTFSK

SrUGT92C1

ATGCAACCACCACATATAATCATGCTTCCATTCATGGCTCAAGGTCATCTCATACCATTCCTAGAACTAGCTCACAAAATCCTCAACAACAACCCAAATTTCACCATCACCATCGTTAACACCCCCCTCAACATCAATTACCTCCGTTCGACCACCGCCAACCACCCATCTCCGCCGCTTCAACTCCACCTTCAACCTCTCCCATTCACCAGCTCCGATCACCAACTCCCACCCAACTCCGAAAACACCGACGGTTTATCGTTATCCCAAATCATCAAACTCTTGCACGCCTCCGCCGCCCTGGAACCCCCATTCCGCCGGTACATCTCCGACGTTGTTTCCGGCGAAGGGAGCTCGTCGGTGTGTATAGTTTCTGATATACTCATGGGGTGGGCTAATGAAGTGGCGAAATCTTTTAACATTGTTAATTACTCGTTCACCACCGGCGGTGCGTATGGTACGGCGGCGCATTGTTCGATTTGGATGAATCTGCCTCACCGGAATGTAGCTGACGGTGGAACCCACGACGAGTTTCCGGTGCCGTCGTTCCCGGAATCGTGCCGGTTTACGATCACACAACTTCATCAGTATCTTCGAGCTGCTGATGGTGAAGATGAGTGGTCGAGATTCTTTCAACCGCAAATATCGTTCTCTCTTCAATCTAACGGTTGGTTATGTAACACCGTTGAAGAGATTGAAACATTGGGGGGGGAGGTGTTGCTAAATTACATAAAACTCCCTGTTTGGTGTATTGGGCCACTTATCCCATTAAAGATGTTGAAAAAGGATTTGGGTTCGGGTATTATTAGTCCAAGATCCGGAAAGCGACCCGGTATCCAACCCGAAAAATGTATAGAATGGTTAGACTCGCACCCTACCGGGTCGGTGCTTTATATTTCATTTGGGTCTCATAATACGATCAGGGAGACCCAAATGATGGAATTAGCGAAAGGGTTGGAAGAGATCAAGAAACCGTTTATTTGGGTAATTAGACCACCAATAGGGTTCGACCTAAAGGGTGAGTTTCAACGTGAATGGTTGCCTGATGGTTTTGAGGATAGAATTGGAAAACAAGGATTGGTGGTGCATAATTGGGCACCTCAGCTAGAGATATTATGTCATCGGTCAACTGGTGCTTTTTTGAGTCACTGTGGATGGAACTCGGTGATGGAGGGTTTGAGCCAAGGCGTGCCATTGATTGGTTGGCCGATAGCGGCAGAACAAGGGTATAATGCGAAGATGTTGGTTGAGGATGCGGGTGTTTGTGTGGTGTTAGCGCGAGGGGTGCATTGTAGGATTACGAAAGAAGAGGTCAGTAGTGTGATCAATGAGGTGTTGGATAAAAGTGAAGGTGGAAAAGGCGAAGATATAAGGAAAAAAGCAGGCGAATTAGGGAAATTGATAAGAGCAAGTGTTGAGAATGACAAGGGTTCTTCATTCATCGCGATGAATGATTTCTTGACCACCGTTCTTTCTGGATTTAAATGA

MQPPHIIMLPFMAQGHLIPFLELAHKILNNNPNFTITIVNTPLNINYLRSTTANHPSPPLQLHLQPLPFTSSDHQLPPNSENTDGLSLSQIIKLLHASAALEPPFRRYISDVVSGEGSSSVCIVSDILMGWANEVAKSFNIVNYSFTTGGAYGTAAHCSIWMNLPHRNVADGGTHDEFPVPSFPESCRFTITQLHQYLRAADGEDEWSRFFQPQISFSLQSNGWLCNTVEEIETLGGEVLLNYIKLPVWCIGPLIPLKMLKKDLGSGIISPRSGKRPGIQPEKCIEWLDSHPTGSVLYISFGSHNTIRETQMMELAKGLEEIKKPFIWVIRPPIGFDLKGEFQREWLPDGFEDRIGKQGLVVHNWAPQLEILCHRSTGAFLSHCGWNSVMEGLSQGVPLIGWPIAAEQGYNAKMLVEDAGVCVVLARGVHCRITKEEVSSVINEVLDKSEGGKGEDIRKKAGELGKLIRASVENDKGSSFIAMNDFLTTVLSGFK

SrUGT78D2

ATGGATACCACCAAAAGCTCCAAAAACGGCAACAAAAAAGAAAAACATGTAGCCGTTTTTGCATTACCATTTGCATCACACCCTGCTCTCCTTCTAGCCGTCACCCGGCGGCTAGCTTCCGCCGCACCGAATGTGGTGTTCTCCTTTTTCAACACCGAACCATCTAACCGACTTTTGTTCTCTGAACTCAATTGCGACAATATATTGCCGAATAATATATCGAATGGTACACCGGAGGGTTTTGTTTTCTCCGGAAACCATGATGAGGGTATGAACTTGTTTCTCGCGGTGGCGAATGAAGAATATAGGAACGATGTTCGTGCGGCGGAGATGGATACCGGGTTGAAGATTAGTTGTCTTGTGGTGGATGCGTTTCTTTGGTTTACAGCTGATATTGCCGAAGAAATGAATATTTCTTGGGTGCCGTTTTGGCCCGGTGGAACTTGTTCTTTTGCGGCACATCTTTATACCGATCTCATCAGAGAAAAATGTGCTCAACTCATAGGTTCTACTCGACAGGACGAAGTTGTCGACTTGGTCCCAGGACTCAAATCGATTCAACTACGTGATTTACCTGACGGGGTCGTATTGGGAGACCTCGAATCACCATGGGCAATCTTACCACTTAAAATGGGAAGAACCTTAACCCGAGCAACCGCGGTTCCCGCCAGTTCTTTCCAAGAACTAGAGGAAGAACTAGACCCCGATGTTACAAAAAACATTTCGTCAAAGTTGAACAATTTCCTCACCATTGGTCCCTTAAATCTCACATTCGAAGAAACAAAACCATCAAAATCTGATGAATACTCTTGCATTTCATGGTTAGATACTCAAAAGATAAGATCGGTTGCTTACATTTGCTTTGGTAGGGTTTGCACGCCTCCGCCTCACGAGCTAGTCGAGCTGGCTGAAGCACTCGAAGAGACCAAAACCGTGTTTCTTTGGTCGATAAACAAAGATGCCACTAAGCATTTGCCTAACGGTTTCTTGGAAAGAATACACGCCAACGGGACAGGGAAAGTTGTCCCGTGGGCCCCACAGGAGGAGGTCTTGAACCATATTGCGGTTCGGGTGTTTGTAGTGCATGGTGGTTGGAATTCGGTGTTGGAGAGTGTAGGAGCCGGTGTCCCGATGATATGTAGGCCGTTTTTCGGGGATCATCATATAAATTCTTGGATGGTTGAGAGGTTGGGAACCGGTTTGAGAATTAAAGGCGGGAGTTTCACAAAACATGCCACTTGTCACGCTTTGGAGCAGGTTTTCTCGGATTCGAAACTCCGGGATGAGAGAGTTAAAGTATTGAAAGATCTTGCTCATAAGACTGTTGCACCGAATGGTAGCTCTAATAAGAATTTCAAGACTTTGGTAGAGGTGGTCACGGGTACTGCCACTTGA

MDTTKSSKNGNKKEKHVAVFALPFASHPALLLAVTRRLASAAPNVVFSFFNTEPSNRLLFSELNCDNILPNNISNGTPEGFVFSGNHDEGMNLFLAVANEEYRNDVRAAEMDTGLKISCLVVDAFLWFTADIAEEMNISWVPFWPGGTCSFAAHLYTDLIREKCAQLIGSTRQDEVVDLVPGLKSIQLRDLPDGVVLGDLESPWAILPLKMGRTLTRATAVPASSFQELEEELDPDVTKNISSKLNNFLTIGPLNLTFEETKPSKSDEYSCISWLDTQKIRSVAYICFGRVCTPPPHELVELAEALEETKTVFLWSINKDATKHLPNGFLERIHANGTGKVVPWAPQEEVLNHIAVRVFVVHGGWNSVLESVGAGVPMICRPFFGDHHINSWMVERLGTGLRIKGGSFTKHATCHALEQVFSDSKLRDERVKVLKDLAHKTVAPNGSSNKNFKTLVEVVTGTAT

SrUGT91D4

ATGGCTACCACCGAAAACCGTAAACAGCTTCATGTTGCGATAATCCCATGGCTTGCTTTCGGTCACATTCTTCCTTTCCTTGAACTTTCCAAATATATAGCACAAATTGGTCACAAAGTCTCTTTTCTTTCGACCACTAGAAACATCCAACGTCTACCAACTCTCCCTTTTCACCTCTCACACCTCATTAATCTTGTTAAACTCACACTTCCACGTGTTCACGAACTGCCGGAGGACGCAGAGGCGACCACGGACGTCCACACTCATGATCTTCGTCACCTAATTAAAGCTTTTGACGGACTTCAGCCGGAGGTCACCGGGTTTCTTGAGCAAGAGTCTCCAGACTGGATTATTTATGATTTTACTCACCACTGGTTGCCATCCGTCGCGGCGGACCTTGGGATCTCGCGAGCCTTTTTTATCACTGCCTCACCATGGTTCATGGCGCACGTGGGACCGTTACCCGATGACATGAAAAATAGTTTCGAGAGTCGAACGACAGTTGAGGATTTCATGACACCGCCCAAGTGGATTCCGTTTCCGAGCAAAGTATGCTACCGGAAGCATGAGTTTGTGCGCAAGATGTCTGCTGCTAATAATCCTGTGATTTCAGGTCTAAAGCACAGAATGATGACGGTTTTGAAGGAATCTGATTGTCTGTTTATAAGAAGTTGTTATGAGGTCGAACCCCAATGGCTAACCCTTTTGGGGAAGCTATACCGTATACCGGTAGTTCCGGTTGGATTAATGCCACCTGAAACATACGGAGACGAGAAAGATGATACATGGGTGTCAGTCAAGAAGTGGCTCGATGGTCAGCAAGTTAACCATGTGGTGTACGTCGCATTAGGAAGTGAAGTTACGGTGACCAAAAGCGAGCTGGCTGAGTTAGCGTTAGGTCTCGAGCTCTCTGGGTTGCCATTTTTGTGGGTTCTCAGAAAACCCGCAGGTTCCACCGAGTCAGACTCGGTGGAGTTGCCTAACGGGTTCTTGGAACGAACTAGTAACCGTGGGATGGTTTGGACGAGTTGGGCACCTCAGTTACGAATACTGAGTCATGAGTCGGTGTGTGGTTTCTTAACTCACTGTGGTTGGAGTTCAGTGGTGGAAGGGTTAATGTTCGGCCACCCTTTAATCATGCTACCGATTTTCGGGGACCAATGTCTGAATGCTCGACTATTAGCGGACAAACAGGTGGGGATCGAGATACCAAGAAATGAGGAAGATGGCTACTTCACCAAGGAGTCGGTTGCCACGTCACTGAGGTCGGTTGTTGTAGACGATGAAGGAGAGATCTACAAGGCGAATGCGAGAGAGATGAGTAAAATATTCAGCGACACTAAGCTGCAAAAGGAATATATAAGTCGTTTCACAGACTATATGGAAAAGAACGTACGTGTGGTTGCCAACAACCATGAGAGTTAA

MATTENRKQLHVAIIPWLAFGHILPFLELSKYIAQIGHKVSFLSTTRNIQRLPTLPFHLSHLINLVKLTLPRVHELPEDAEATTDVHTHDLRHLIKAFDGLQPEVTGFLEQESPDWIIYDFTHHWLPSVAADLGISRAFFITASPWFMAHVGPLPDDMKNSFESRTTVEDFMTPPKWIPFPSKVCYRKHEFVRKMSAANNPVISGLKHRMMTVLKESDCLFIRSCYEVEPQWLTLLGKLYRIPVVPVGLMPPETYGDEKDDTWVSVKKWLDGQQVNHVVYVALGSEVTVTKSELAELALGLELSGLPFLWVLRKPAGSTESDSVELPNGFLERTSNRGMVWTSWAPQLRILSHESVCGFLTHCGWSSVVEGLMFGHPLIMLPIFGDQCLNARLLADKQVGIEIPRNEEDGYFTKESVATSLRSVVVDDEGEIYKANAREMSKIFSDTKLQKEYISRFTDYMEKNVRVVANNHES

SrUGT85C3-1

ATGGATGCAGTGGTCGAAACAGAAAAGAAGAAACCACACGTCATCTGTATGCCGTTTCCAGATCTAAGCCACATAAAAGCCACGCTCAAACTAGCCGAGCTTCTCTACCACAAAGGACTCCAGATAACCTTCATCAACACCGATTTCGTCCACAACCGGTTTCTTGAATCAGGAGGACCACACTGTTTAGACGGTGCACCTGGTTTCCGGTTTGAAACCATTCCAGATGGTGTTACTCGCAGATCGGAAGCTAGCATCCACAACACCAGAGAACTACTCAAGTCCGTCGAAACCATCTTCTTGGATCGTTTCATTGACCTTGTAACCAAACTTCCGGATCCTCCGACGTGTATTATCTGTGATGGTTTCTTGTCGGTTTTCACAATTGACGCTGCAAAAAAGCTTGGAATCCCGGTTATGATGTATTGGTCACTTGCTGCCTGTGGCTTCATGGGGTTTTATCAAATGCATTCTCTCATTGAGAAAGGATTTGCACCGCTTAAAGATGAAAGTTATTTGACAAATGGGTATTTAGACACCGTCGTTGATTGGGTTCCGGGAATGGAAAGCATCCGTCTTAAGGAGTTCCCATTGGTTTGGAACACTGACTTGAATGATAAACTTCTAACATTCTGCAAGGAAGCTCCCCAAAGGTGTCACTCGGTTTCAAATCATATTTTCCACACGTTTGATGAGTTAGAGCCTAGTGTTATCAAAGCTTTGTCATCTATATATTCTCGCGTTTACGCCATCGGCCCACTACAACTACTTCTTGATCAGATACCTGAAGAAAAAAAGCAAACTGGAATTTCAGGTTTGAATGGATACAGTTTTGTGAAAGAAGAACCCGAGTGTTTTAAGTGGCTTCAATCTAAGGAACCATATTCTGTCATTTATGTAAATTTTGGGAGTTCAACATTAATGTCTTTAGAAGACTTGATAGAATTTGGTTGGGGACTTGTTAATAGCAACCACTATTTCCTTTGGATCATCCGATCTAACTTGATAAATGGAGAATCTGCAGTTTTGCCTCTTGAATTAGACGAACATATAGAAAAGAGAGGCTTTATTGCAAGCTGGTGTTCACAAGAAAAGGTCTTGAACCACCCTTCCATTGGAGGGTTCTTGACTCATTGTGGGTGGGGATCCACAATCGAGAGCTTGTCAGCTGGGGTGCCAATGATATGTTGGCCTTTTTTTTGGGACCAACCGACCAACTGTAGGTATATATGCAATGAATGGGAAGTTGGACTTGAGATGGGGAATAAAGTGAAACGAGATGGAGTCAAGAGACTTGTACAAGAGTTAATGGGAGAAGGTGGTCACAAAATGAGAAACAAGGCCAAAGAATGGAAGGAAAAGGCTCGTATTGCCACATGCCCTAACGGTTCATCTTCTTTGAATGTGGATAAAATTGTCGAGGAGATAACGGTGCTATCAAGAGACTAG

MDAVVETEKKKPHVICMPFPDLSHIKATLKLAELLYHKGLQITFINTDFVHNRFLESGGPHCLDGAPGFRFETIPDGVTRRSEASIHNTRELLKSVETIFLDRFIDLVTKLPDPPTCIICDGFLSVFTIDAAKKLGIPVMMYWSLAACGFMGFYQMHSLIEKGFAPLKDESYLTNGYLDTVVDWVPGMESIRLKEFPLVWNTDLNDKLLTFCKEAPQRCHSVSNHIFHTFDELEPSVIKALSSIYSRVYAIGPLQLLLDQIPEEKKQTGISGLNGYSFVKEEPECFKWLQSKEPYSVIYVNFGSSTLMSLEDLIEFGWGLVNSNHYFLWIIRSNLINGESAVLPLELDEHIEKRGFIASWCSQEKVLNHPSIGGFLTHCGWGSTIESLSAGVPMICWPFFWDQPTNCRYICNEWEVGLEMGNKVKRDGVKRLVQELMGEGGHKMRNKAKEWKEKARIATCPNGSSSLNVDKIVEEITVLSRDSrUGT85C4

ATGGATGCGGAGAAGAAACCGCACGTCATATGCATACCTTGTCCAGGACAAAGCCACATAAAAGCCATGCTCAAACTAGCCGAGCTACTCCACCACAAGGGACTCCAAATAACCTTCGTCATCACCAATTTTGTCCACAACCAATTTCTTGAATCAGCGGGCCCACACTGCCTAGACGGGGCACCCGGGTTCCGGTTTGAAACCATTCCCGATGGTGTTTCTCGAAGTTTGGAAACCAGCATTGACACCACAAGAGAATTACTTTTGCGATCCATTGAAACCAACTTCTTGGCTCCTTTTGTTGACCTTGTAACCAAACTACCGGATTCTCCGACTTGTATTATCTCAGATGGGTACATGTCGGCTTTCACAATCGAGGCTGCACATAAGCTTGGAATCTCAGTCATGATGTATTGGACAGTTGCTGCTTGTGGCTTCATGGGGTGTTACCAAATCCAATCCCTCATCGATAGAGGATTTGCACCGCTTAAAGACAAAAGTTATTTGACAAATGGGTATTTAGACACCGTCGTTGATTGGGTTCCAGGAATGAATGGCATTCGTCTTAAGGATTTTCCAATGACTTGGACCACTGACATAAATGACAAAGTTTTAAAGTTTAGTACAGAAGCTCCCCGAAGGTCTCTCACGGTTTCACATCATATTTTCCACACGTTCGACGAGTTGGAGCCTAGTATTATCAAAGCTTTGTCATCGATGTATGCTAACGTGTACACCATCGGCCCACTACAACTACTTCTCGATCAAATACCTGAAGAACAAAAGCAAAATGGAATTTCGGGTATCAATAGATACAGTCTAGTGAAAGAAGAACCAGAATGTTTCAAGTGGCTTGAATCTAAGGAACCAAATTCTGTCATTTATGTAAATTTTGGGAGTACAACACTAATGTCTTCAGAAGACCTTATAGAATTTGCTTGGGGACTTGCTAATAGCAACCACTATTTCCTTTGGATAATCCGATCTTACTTGGTGAATGGGGAATCTATAGTTCTACCTCTTGAATTTGAGGAACATATAAAAAACAGAGGTTTTATCGCAAGCTGGTGTTCACAAGAAAAGGTCTTGAACCACCCTTCGGTCGGAGGGTTTTTGACTCATTGTGGGTGGGGATCCACCATTGAGAGCTTGTCGGCAGGGGTGCCGATGATATGTTGGCCATATTTGTGGGACCAGCTGACCAACTGTAGGTATATATGCAATGAATGGGAGGTTGGACTAGAGATGGGGAATAAAGTGAACCGCGATGAAGTCAAGATGCTTGTACAAGACTTGATGGGAGAAAGAGGTCAAAAAATGAGAAACAAAGCCATAGAATGGAAGGAAAAGGCTCGTATTGCAACAAGTCCCCACGGTTCATCTTCTTTGAACATTGACAAAATTGTGAAGGAAATCACCATGCTATCAAGAGACTAG

MDAEKKPHVICIPCPGQSHIKAMLKLAELLHHKGLQITFVITNFVHNQFLESAGPHCLDGAPGFRFETIPDGVSRSLETSIDTTRELLLRSIETNFLAPFVDLVTKLPDSPTCIISDGYMSAFTIEAAHKLGISVMMYWTVAACGFMGCYQIQSLIDRGFAPLKDKSYLTNGYLDTVVDWVPGMNGIRLKDFPMTWTTDINDKVLKFSTEAPRRSLTVSHHIFHTFDELEPSIIKALSSMYANVYTIGPLQLLLDQIPEEQKQNGISGINRYSLVKEEPECFKWLESKEPNSVIYVNFGSTTLMSSEDLIEFAWGLANSNHYFLWIIRSYLVNGESIVLPLEFEEHIKNRGFIASWCSQEKVLNHPSVGGFLTHCGWGSTIESLSAGVPMICWPYLWDQLTNCRYICNEWEVGLEMGNKVNRDEVKMLVQDLMGERGQKMRNKAIEWKEKARIATSPHGSSSLNIDKIVKEITMLSRD

SrUGT76H2

ATGGGAGATGAGAGAAACCAAACCAAACATTTGGTTCTTGTAGCAAGTCCATTTCAAGGTCATATGACTCCTATGCTTCAACTAGGTAGTGTTCTTCATTCCAAAGGCTTCTCAATCACCATCGCTCACACCAAATTAAACTCACCCGATCCTTCAAACCATCCCGAATTCGTCTTTCTTCCGCTTTTCGACAACTTTTTAGCCATTGATGCATCCGCCAACTTCACCAAGTTTCTTGAAATTCTTAACAATAACTGCAAAAAGCAACTACAAGATCGCTTGACTCAACAGATTCAACAACGGAAAGGAGTAAACGATGATAAGAACGAGAAGATTACAATTATTCATGATAATATTATGTATTTTGCGGAAGAAGTTGCAAGAAATTTGAATCTTTCGAGTATTGTTTTAAGAAGTTGTAGTGCGTCGTATATGCCAGCTTTTCTTGCTCTTGATAAACTTAATGCAGAAGGACATCTTCCTGTGCAAGAATCTATGCTAGAGAAGCTTGTACCAGAACTCTATCCTCTCAGATACAAAGATTTACCTTTCAACAACACATCAACAGAAGTATTAAAAGAAATTCTTGCACTTTCGGATTGTATTAGAACACCATCAGCCATAATTTGGAACACAATGGATTTTCTTGAGAATTCATCACTTACAATACTTAAGAAGTATTATGAGGCCCCAATCTTCACCATCGGCCCGTTGAATGAATTGGCTCAATGCCCGTCTACAAGCTTTCTCAAAGAAGACACCGATTGCATATCCTGGCTTGATAAGCAAGCTCCAAGATCTGTTATATATGTAAGTTTAGGGAGTTTAGCAACCATGGATGAACATGAGCTAGCCGAGACTGCATGGGGCTTAGCCGATAGTAACCAACCGTTCCTATGGGTGGTTAGACCTGGTTCAGTCAAAGGGTCGGATTGGATTGAGTTTTTGCCAGATGGGTTCGAAGAAAAAGTAAGAGGAAGAGGTCTCGTGTTGAAATGGGCCCCACAAAAGCAAGTTTTGGCTCATTTTGCCGTTGGAGGGTTTTGGAGCCATTGTGGTTGGAACTCGAGTTTGGAGAGTATTTCACAAGGGGTCCCGATGATATGTCGGCCATTTTTGGGGGACCAATATGTAAATGCAAGGTATTTAAGTTTCGTGTGGCGGGTGGGTTTGGAACTCGAATATTTGGAGAGACATGTGATTGTAAGTGCAATTAGAAGACTATTGGTGGATGATGAAGGAGAAGAGACGAGGAAACGTGCGAATAATATGAAAGAAAAGGCTAAACATTGTTTGTGCAAAGGCGGATCTTCAGTCAGTTCCTTGAATAACTTGGTAGAATTCATCCTTGGAGCTCGAGTTTTACAAAGTGTTACAACTTAG

MGDERNQTKHLVLVASPFQGHMTPMLQLGSVLHSKGFSITIAHTKLNSPDPSNHPEFVFLPLFDNFLAIDASANFTKFLEILNNNCKKQLQDRLTQQIQQRKGVNDDKNEKITIIHDNIMYFAEEVARNLNLSSIVLRSCSASYMPAFLALDKLNAEGHLPVQESMLEKLVPELYPLRYKDLPFNNTSTEVLKEILALSDCIRTPSAIIWNTMDFLENSSLTILKKYYEAPIFTIGPLNELAQCPSTSFLKEDTDCISWLDKQAPRSVIYVSLGSLATMDEHELAETAWGLADSNQPFLWVVRPGSVKGSDWIEFLPDGFEEKVRGRGLVLKWAPQKQVLAHFAVGGFWSHCGWNSSLESISQGVPMICRPFLGDQYVNARYLSFVWRVGLELEYLERHVIVSAIRRLLVDDEGEETRKRANNMKEKAKHCLCKGGSSVSSLNNLVEFILGARVLQSVTT

SrUGT88B2

ATGGGCCACCTGGTTTCCATGGTGGAACTCGCAAAACAAATCCAAATTCACAACCCTTCACTCTCTGTTATCGTCTTCATAACCCCGACACCTTTTGAAACTGAAAACTACATCAACATCGTCTCCACCGCCAACCCATCAATCAAGTTCCACCGTCTCCCCGATGATGTTACTCTTCCACCAGACTTCTCTTCAGATTTCATAGACCGTGCTTTTGGGATCCCGGAGCTTTACAACCCAATTGTCCACAACGCCCTCGTAAACATCCGAAACGAATCAACCATCAAAGCTGTGATCCTTGATTTCGTTTCAAATGCGGCTTTCCGAGTCTGTAAGTCTCTAAACCTTCCGACTTACTACTTTTATACAAGTGGTGCTTCTGGCCTTTGTGAGTTCTTATACCTCACTACCATTCACAACACCACTTCTAAGAACATCGGAGATCTCGACGTTTACTTTGATATTCCTGGAGTACCTCCAATTCATGCATCTGATATGCCCCCGGTTATGTTTGATAGAGAAACCAACATGTACAAAAACTTCATACACACTGCAAGTAACATGGCAAAATCTTCGGGTTTGATTGCAAATAGTTTTGCGGGGTTTGAAGAAAGAGCCACCGACGCTCTTCGAAATGGTAAATGCGTCACCGACGGTCCAACTCCACCACTTTATCTAATCGGGCCTTTGATTGCAAGTGACATTCAAGTGGATCCTAGTGAAAATGAGTGCCTAAAATGGTTGAACACACAGCCATCTACAAGTGTAGTGTTTTTATGTTTTGGAAGTATGGGTGTGTTCAAGAAACAGCAATTGAAAGAAATAGCTATTGGATTGATGAAGAGCGAGCAAAGATTTTTGTGGGTGGTGCGCGATCCACCACCAGATGATGAAAACGATTCGGGTTCAGTGGCTAATAATTACGGGCTCGATGCTATTCTTACTGAAGAGTTTGTGGCACGAACTGCGGGTAGGGGTTTGGTGGTCAAAAACTGGGCACCGCAGCCGGCTATACTGAGTCATGATTCAGTGGGTGGGTTTGTGAGTCATTGTGGGTGGAACTCGACGCTTGAAGCGGTGGTTGCTGGGGTTCCAATGGTGGCATGGCCATTGTATGCAGAGCAAAAGATGAACAGGGTGTTTTTGGTTGAAGAAATGAAGGTGGCAGTGGCGGTGAAAATGTCGGTGGATGGGTTTGTGACGGCGGATGCGGTGGAGGAGAAAGTGAGGGATTTAATGGAGGGTAAGGAAGGGAGAGTGGTGAGAGAACGGGTTTTAGAGATGAGTCGATTGGCAAAGGCGGCTGTGGAGGACGGCGGCTCTTCGCAACTTGATTTCTTTAAATTAACCAACTCCTGGACAAACATGTAA

MGHLVSMVELAKQIQIHNPSLSVIVFITPTPFETENYINIVSTANPSIKFHRLPDDVTLPPDFSSDFIDRAFGIPELYNPIVHNALVNIRNESTIKAVILDFVSNAAFRVCKSLNLPTYYFYTSGASGLCEFLYLTTIHNTTSKNIGDLDVYFDIPGVPPIHASDMPPVMFDRETNMYKNFIHTASNMAKSSGLIANSFAGFEERATDALRNGKCVTDGPTPPLYLIGPLIASDIQVDPSENECLKWLNTQPSTSVVFLCFGSMGVFKKQQLKEIAIGLMKSEQRFLWVVRDPPPDDENDSGSVANNYGLDAILTEEFVARTAGRGLVVKNWAPQPAILSHDSVGGFVSHCGWNSTLEAVVAGVPMVAWPLYAEQKMNRVFLVEEMKVAVAVKMSVDGFVTADAVEEKVRDLMEGKEGRVVRERVLEMSRLAKAAVEDGGSSQLDFFKLTNSWTNM

SrUGT91D2

ATGGCTACCAGTGACTCCATAGTTGACGACCGTAAGCAGCTTCATGTTGCGACGTTCCCATGGCTTGCTTTCGGTCACATCCTCCCTTACCTTCAGCTTTCGAAATTGATAGCTGAAAAGGGTCACAAAGTCTCGTTTCTTTCTACCACCAGAAACATTCAACGTCTCTCTTCTCATATCTCGCCACTCATAAATGTTGT

TCAACTCACACTTCCACGTGTCCAAGAGCTGCCGGAGGATGCAGAGGCGACCACTGACGTCCACCCTGAAGATATTCCATATCTCAAGAAGGCTTCTGATGGTCTTCAACCGGAGGTCACCCGGTTTCTAGAACAACACTCTCCGGACTGGATTATTTATGATTATACTCACTACTGGTTGCCATCCATCGCGGCTAGCCTCGGTATCTCACGAGCCCACTTCTCCGTCACCACTCCATGGGCCATTGCTTATATGGGACCCTCAGCTGACGCCATGATAAATGGTTCAGATGGTCGAACCACGGTTGAGGATCTCACGACACCGCCCAAGTGGTTTCCCTTTCCGACCAAAGTATGCTGGCGGAAGCATGATCTTGCCCGACTGGTGCCTTACAAAGCTCCGGGGATATCTGATGGATACCGTATGGGGCTGGTTCTTAAGGGATCTGATTGTTTGCTTTCCAAATGTTACCATGAGTTTGGAACTCAATGGCTACCTCTTTTGGAGACACTACACCAAGTACCGGTGGTTCCGGTGGGATTACTGCCACCGGAAATACCCGGAGACGAGAAAGATGAAACATGGGTGTCAATCAAGAAATGGCTCGATGGTAAACAAAAAGGCAGTGTGGTGTACGTTGCATTAGGAAGCGAGGTTTTGGTGAGCCAAACCGAGGTTGTTGAGTTAGCATTGGGTCTCGAGCTTTCTGGGTTGCCATTTGTTTGGGCTTATAGAAAACCAAAAGGTCCCGCGAAGTCAGACTCGGTGGAGTTGCCAGACGGGTTCGTGGAACGAACTCGTGACCGTGGGTTGGTCTGGACGAGTTGGGCACCTCAGTTACGAATACTGAGCCATGAGTCGGTTTGTGGTTTCTTGACTCATTGTGGTTCTGGATCAATTGTGGAAGGGCTAATGTTTGGTCACCCTCTAATCATGCTACCGATTTTTGGGGACCAACCTCTGAATGCTCGATTACTGGAGGACAAACAGGTGGGAATCGAGATACCAAGAAATGAGGAAGATGGTTGCTTGACCAAGGAGTCGGTTGCTAGATCACTGAGGTCCGTTGTTGTGGAAAAAGAAGGGGAGATCTACAAGGCGAACGCGAGGGAGCTGAGTAAAATCTATAACGACACTAAGGTTGAAAAAGAATATGTAAGCCAATTCGTAGACTATTTGGAAAAGAATGCGCGTGCGGTTGCCATCGATCATGAGAGTTAA

MATSDSIVDDRKQLHVATFPWLAFGHILPYLQLSKLIAEKGHKVSFLSTTRNIQRLSSHISPLINVVQLTLPRVQELPEDAEATTDVHPEDIPYLKKASDGLQPEVTRFLEQHSPDWIIYDYTHYWLPSIAASLGISRAHFSVTTPWAIAYMGPSADAMINGSDGRTTVEDLTTPPKWFPFPTKVCWRKHDLARLVPYKAPGISDGYRMGLVLKGSDCLLSKCYHEFGTQWLPLLETLHQVPVVPVGLLPPEIPGDEKDETWVSIKKWLDGKQKGSVVYVALGSEVLVSQTEVVELALGLELSGLPFVWAYRKPKGPAKSDSVELPDGFVERTRDRGLVWTSWAPQLRILSHESVCGFLTHCGSGSIVEGLMFGHPLIMLPIFGDQPLNARLLEDKQVGIEIPRNEEDGCLTKESVARSLRSVVVEKEGEIYKANARELSKIYNDTKVEKEYVSQFVDYLEKNARAVAIDHES

SrUGT83C1

ATGAAAACTATTCATGTTCTAGCAATACCCTACCCAGCACAAGGCCATGTGATACCACTTATGGAGGTAGCACGGTGCTTGACCAACTACTGTCTCAAAGTCACGTTTGTGAACTCAGAGTTTACAAACAAACAGATTATGAGTTCTGGTTCATCGATAGATGTTCCGAGTGATTTATTGCAAATGGTTTCAATCCCAGATGGGATTGAAACATTTGAAGATAGGAACAACCTTGGGAAGTTGTCTGAAACAATGTTCCAATTCATGCCCTCCAAACTAGAAGAGCTAATAAATGATATCAACAAAAATGAAGACGAGAGAATTGTGTGCATCATTGCGGACTATTGCATGGGATGGGTCAAAAGTGTTGCACAGAAGATGGGTATTAGACTAGCAGTCTTTTGTCCCACCTCAGCAGCCGTTTTGGCCGTGACCATGAGTATTCGAAAGCTGATGGACGATGAAATTCTAAACTGCAAAGGTGAGGCAACTTCAAAGAATCAAATGGTTCAATTGTCAGCATCCATGCCACTCATGGACCCTGCACACTTTGTATGGGTGTGTATGGGGGACCCAATAGTAAACCAAATTTTCTTTGATTACCTATTTTATAAAGGTATGGAAGCAGCAGAAGCAGCGGATCACATAATTTGCAATTCAAACATGGACTTGGAGCCTGGGGCGTTGACTCTTTTCCCAAAGATGTTGCCAATTGGTCCACTTTTGTCAACCAACCGATCCAAAAGACAAGTAGGCCACTTTTGGAGTGAAGACTCCACTTGCCTAACATGGCTTGATCAACAACCGATCTGCTCGGTCATCTATGTGGCATTTGGGAGCTTCACAATATTTGACCAGACTCAGTTTGAAGAGCTCGCACTAGGGCTCGAGTCAACCAAAAAGCCATTCTTATGGGTTGTTCGACCTAGTACAAGTGGAAGCATTGATTATGCATTCCCAAGTGGTTACATGGACCGAATAGCCAATTATGGGAAAATTGTGAGTTGGGCACCTCAACAGGAGGTGCTAAAGCATCCGTCGGTTGCTTGCTTTATGAGCCATTGTGGTTGGAACTCTACAGCAGAAGGTGTGAGCAATGGTCTTCCATTCTTGTGTTGGCCATACTTTGCTGATCAGTTTTTTAATGAAACTTACATATGTGATATTTGGAAAACCGGTGTCGGTTTAAACAAAGATGATACAGGCATTGTTCCGCGAGGAGAAATCAAGAGCAAAGTAGAAGAGTTGCTTAGCAACAAGATACTAAAAGAAAATGCCTTGAATTTGCATAAAAAACTGAGAGACTGCTTAAGAGCAGACAATTCCTCACAAAAAAATTTGAAAAAATTCGTTGAATGGATAAAAGAAGAAAATGATTATGCTTGTGCAAATGAAACCAACAAATGA

MKTIHVLAIPYPAQGHVIPLMEVARCLTNYCLKVTFVNSEFTNKQIMSSGSSIDVPSDLLQMVSIPDGIETFEDRNNLGKLSETMFQFMPSKLEELINDINKNEDERIVCIIADYCMGWVKSVAQKMGIRLAVFCPTSAAVLAVTMSIRKLMDDEILNCKGEATSKNQMVQLSASMPLMDPAHFVWVCMGDPIVNQIFFDYLFYKGMEAAEAADHIICNSNMDLEPGALTLFPKMLPIGPLLSTNRSKRQVGHFWSEDSTCLTWLDQQPICSVIYVAFGSFTIFDQTQFEELALGLESTKKPFLWVVRPSTSGSIDYAFPSGYMDRIANYGKIVSWAPQQEVLKHPSVACFMSHCGWNSTAEGVSNGLPFLCWPYFADQFFNETYICDIWKTGVGLNKDDTGIVPRGEIKSKVEELLSNKILKENALNLHKKLRDCLRADNSSQKNLKKFVEWIKEENDYACANETNK

SrUGT75E1-2

ATGGCTCAATCTCAACCTCAACCACACTTCCTCGTTGTAACCTTTCCAGCCCAAGGTCACATTAACCCGGCTCTACAGTTCGCTAAACAACTCGCCCGGTTCGATGTTAAACTCACCTTCACCACCACCGTCTCCGCCTACCGTCGCATGACCAAATTTGACCAGATTTACAATAATTTCAACTTTGTTGTTTATTCAGACGGCTTCGATGACGGTTTCACTTCTAAATCCGGTGACCCTGATCTCTTCATGACTCAGTTTAGGACCCGGGGAATCCAATCCTTGAAAGAAACCATAACTTCTAGTGCTGAAAATGGCACACCGGTCACATGTTTGGTGTACACCTTGCTCCTACCTTGGGCTGCAGAACTGGCGCGTGAACTTAACGTGCAACCAGCCCTTCTTTGGATCCAACCAGCATCGGTGTTTCGTGTGTACTATTATTATTTCAATGGGTATGATAAACTCATTGGTGAAGATTGTACCGACTCTTCATGGTCCATCGAGTTACCGGGGATACCATCGCTCAAAAGTTGTGATTTACCCTCGTTTTGTCTCCCTTCGAGCCCTTATGATATGTTGTTATCTTTGTTTAAGGAACTGCTTCATACGTTGAGTTCGTTTGAAAAGCCGAAGATACTTGCGAATACGTTTGATGCGTTGGAAGAAGAGGCCTTGAAAGAGATTGATGGCAAGATAAACATGATTGGTGTTGGACCGTTGATTCCATCGGCTTTCTTGGATGGAAACGAGCAATCGGATAGATCTTTTGGAGGAGATATGTTTGACAAATCACATGATTGTTTGGAATGGATGAACACAAATCATGAAGGATCCATTGTTTACGTATCTTTTGGTAGTCTTATAGAATTGTCAAAGAAAGAAAAGGAGTCAATAGCTTGTGGTTTGTTGGAGAGCAAAAGGCCTTTTTTGTGGGTGATGAGAGATAAAGATGGAGAAGCAAAAGAAAAGGAAGATGAAATAAGTTGCATAGAGGAATTGAAACAATTAGGTTTGATAGTTCCTTGGTGCAGCCAACTAGAGGTGTTGTCACACCCGTCTTTAGGTTGTTTTGTGACACATTGTGGTTGGAATTCGACACTCGAGAGTATCGCGTGTGGGGTTCCGGTGGTTGCGTTTCCTAGATGGTCCGATCAAACAACAAATGCAAAGCTTATTGAAGATGTGTGGGGAATTGGGACGAGGGTGACCGCGAATGATCAAGACGGAGTTGTTGAAGCGGAGGAGATAAGAAGGTGTATAGAAATGGTGATGGGAGGTCATGAAAGAGGAGAAACAATGAGAATGAATGCTAAGAAGTGGAAGGATTTTGCTAGAGAGGCTATGAAAGAAAGTGGATCTTCGTATATCAATCTCAAGGATTTTGTTACACAAATTGGAAGTTCTACTTAA

MAQSQPQPHFLVVTFPAQGHINPALQFAKQLARFDVKLTFTTTVSAYRRMTKFDQIYNNFNFVVYSDGFDDGFTSKSGDPDLFMTQFRTRGIQSLKETITSSAENGTPVTCLVYTLLLPWAAELARELNVQPALLWIQPASVFRVYYYYFNGYDKLIGEDCTDSSWSIELPGIPSLKSCDLPSFCLPSSPYDMLLSLFKELLHTLSSFEKPKILANTFDALEEEALKEIDGKINMIGVGPLIPSAFLDGNEQSDRSFGGDMFDKSHDCLEWMNTNHEGSIVYVSFGSLIELSKKEKESIACGLLESKRPFLWVMRDKDGEAKEKEDEISCIEELKQLGLIVPWCSQLEVLSHPSLGCFVTHCGWNSTLESIACGVPVVAFPRWSDQTTNAKLIEDVWGIGTRVTANDQDGVVEAEEIRRCIEMVMGGHERGETMRMNAKKWKDFAREAMKESGSSYINLKDFVTQIGSST

SrUGT88B1-1

ATGGAGTCCTCTAAGGTGATCCTGTATCCTTCTCCCGGAATCGGCCATCTTGTTTCCATGGTGGAGCTTGGAAAACTCATCCACACCCACCACCCTTCACTCTCCGTTATCATCCTCGTACTTCCGGCTACATATGAAACCGGGTCCACCACTACATACATCAACACCGTCTCCACCACCACCCCCTTCATCACCTTCCACCACCTCCCCGTTATCCCTCTTCCACCAGACTCATCTTCTGAATTCATAGACCTTGCCTTCGATATCCCTCAACTTTACAACCCGGTCGTCTACAACACCCTCGTAGCCATCTCCGAAACCTCAACCATCAAAGCTGTCATCCTTGATTTCTTTGTAAACGCAGCTTTTCAGATCTCTAAAAGTCTCGATCTTCCCACTTACTACTTCTTTACCAGTGGCGCCTCTGGTCTCTGTGCGTTCTTACATCTTCCAACCATCTACAAAACATATTCCGGAAACTTTAAAGATCTAGATACTTTCATTAATATTCCTGGGGTACCTCCCATTCATTCTTCCGATATGCCCACAGTTATGTTTGATAAGGAAAGTAATTCCTACAAAAACTTCGTAAAAACCTCAAATAACATGGCAAAATCTTCCGGAGTCATTGCAAACAGCTTCTTGCAGTTGGAGGAAAGAGCTGCTCAAACTCTCCGAGATGGTAAATCCATCACGGACGGTCCCTCTCCACCTATTTATCTAATCGGGCCTTTAATCGCTAGCGGCAATCAAGTTGATCATAACGAAAACGAGTGTTTAAAATGGCTGAACACACAACCTAGTAAAAGTGTAGTGTTTTTGTGCTTTGGGAGCCAGGGTGTGTTTAAGAAAGAACAATTGAAGGAAATAGCGGTTGGGTTAGAGAGAAGTGGGCAAAGATTTTTATGGGTGGTGCGAAAGCCGCCATCAGATGGTGGTAAAGAGTTCGGTCTTGATGATGTTCTTCCTGAAGGGTTTGTAGGCAGGACTAAAGAAAAGGGTCTGGTGGTGAAGAACTGGGCGCCTCAACCAGCGATTCTTGGTCATGAATCGGTGGGAGGATTTGTGAGTCATTGCGGGTGGAACTCGTCGCTTGAAGCGGTTGTTTTTGGTGTGCCGATGGTGGCATGGCCGTTGTACGCAGAGCAGAAGATGAACAGAGTGTATTTGGTTGAGGAAATAAAGGTGGCACTTTGGTTGAGAATGTCGGTAGATGGGTTTGTGAGTGCAGAGGCGGTAGAGGAGACGGTGAGACAGTTAATGGATGGGAGAAGAGTGAGAGAACGGATTTTGGAGATGAGTACAAAAGCGAAGGCTGCGGTGGAGGACGGCGGTTCCTCTCGAGTTGATTTCTTCAAATTAACTGAGTCATGGACCCACAAGTGA

MESSKVILYPSPGIGHLVSMVELGKLIHTHHPSLSVIILVLPATYETGSTTTYINTVSTTTPFITFHHLPVIPLPPDSSSEFIDLAFDIPQLYNPVVYNTLVAISETSTIKAVILDFFVNAAFQISKSLDLPTYYFFTSGASGLCAFLHLPTIYKTYSGNFKDLDTFINIPGVPPIHSSDMPTVMFDKESNSYKNFVKTSNNMAKSSGVIANSFLQLEERAAQTLRDGKSITDGPSPPIYLIGPLIASGNQVDHNENECLKWLNTQPSKSVVFLCFGSQGVFKKEQLKEIAVGLERSGQRFLWVVRKPPSDGGKEFGLDDVLPEGFVGRTKEKGLVVKNWAPQPAILGHESVGGFVSHCGWNSSLEAVVFGVPMVAWPLYAEQKMNRVYLVEEIKVALWLRMSVDGFVSAEAVEETVRQLMDGRRVRERILEMSTKAKAAVEDGGSSRVDFFKLTESWTHK

SrUGT73E1-2

ATGGTGGCACCACCAACCAACCTTCATTTTGTTTTGTTTCCTCTTATGGCTCAAGGCCATCTGGTACCCATGGTCGACATCGCTCGAATCTTAGCCCAACGTGGTGCAACGGTCACCATAATCACCACACCCTACGATGCCAACCGGGTCAGACCGGTTATCTCCCGAGCCATCGCGACCAATCTCAAGATCCAGCTACTCGAACTCCAACTGCGGTCAACCGAAGCCGGTTTACCCGAAGGGTGCGAAAGCTTCGACCAACTTCCGTCATTCGAGTACTGGAAAAATATTTCAACCGCTATCGATTTGTTACAACAACCCGCTGAAGATTTGCTCCGAGAACTTTCACCACCACCCGATTGCATCATATCGGACTTTTGGTTCCCGTGGACCACCGATGTGGCTCGACGGTTAAACATCCCCCGGCTCGTGTTCAACGGAAAGGGCTGCTTTTATCTCTTGTGCATGCATGTTGCGATCACTTCCAACATTTTGGGAGAGAATGAACCGGTCAGTAGTAATACCGAGCGCGTTGTGCTGCCCGGTTTACCTGACCGGATCGAAGTCACTAAACTTCAGATCCTCGGTTCGTCGAGACCAGCCAACGTAGACGAAATGGGCTCGTGGCTTCGAGCCGTAGAAGCCGAGAAAGCTTCATTCGGGATAGTGGTTAATACTTTCGAAGAGCTTGAACCGGAGTACGTTGAAGAATACAAAACGGTTAAAGATAAGAAGATGTGGTGTATCGGCCCGGTTTCGTTATGCAACAAAACCGGGCCGGATTTAGCCGAGCGAGGAAACAAGGCTGCAATAACCGAACACAACTGCTTAAAATGGCTCGATGAGAGAAAACTGGGGTCCGTGTTATACGTTTGTTTAGGTAGCCTTGCACGCATTTCTACCGCACAAGCAATCGAGCTCGGGTTAGGACTCGAGTCCATAAACCGACCCTTTATATGGTGCGTAAGAAACGAAACCGATGAGCTCAAAACATGGTTTTTGGATGGGTTTGAAGAAAGGGTTAGAGATCGCGGGTTGATCGTTCATGGTTGGGCGCCACAGGTTTTGATACTGTCGCACCCAACCATTGGCGGTTTCTTAACCCATTGCGGTTGGAACTCGACTATTGAATCGATTACCGCGGGTGTTCCAATGATCACGTGGCCGTTTTTTGCGGACCAGTTTTTGAATGAAGCTTTTATAGTTGAAGTTTTGAAGATTGGAGTTAGGATTGGTGTTGAGAGAGCTTGTTCGTTTGGGGAAGAAGATAAGGTTGGAGTGTTGGTGAAGAAGGAGGATGTGAAAAAGGCTGTTGAATGCTTGATGGATGAAGATGAAGATGGTGATCAGAGAAGAAAGAGGGTGATTGAGCTTGCAAAAATGGCGAAGATTGCAATGGCGGAAGGTGGATCTTCTTATGAAAATGTATCGTCGTTGATTCGAGATGTGACTGAAACAGTTAGAACACCACATTAG

MVAPPTNLHFVLFPLMAQGHLVPMVDIARILAQRGATVTIITTPYDANRVRPVISRAIATNLKIQLLELQLRSTEAGLPEGCESFDQLPSFEYWKNISTAIDLLQQPAEDLLRELSPPPDCIISDFWFPWTTDVARRLNIPRLVFNGKGCFYLLCMHVAITSNILGENEPVSSNTERVVLPGLPDRIEVTKLQILGSSRPANVDEMGSWLRAVEAEKASFGIVVNTFEELEPEYVEEYKTVKDKKMWCIGPVSLCNKTGPDLAERGNKAAITEHNCLKWLDERKLGSVLYVCLGSLARISTAQAIELGLGLESINRPFIWCVRNETDELKTWFLDGFEERVRDRGLIVHGWAPQVLILSHPTIGGFLTHCGWNSTIESITAGVPMITWPFFADQFLNEAFIVEVLKIGVRIGVERACSFGEEDKVGVLVKKEDVKKAVECLMDEDEDGDQRRKRVIELAKMAKIAMAEGGSSYENVSSLIRDVTETVRTPH

SrUGT72F1

ATGGAAAAACCACCACATATCGCCATTGTACCCAGCCCAGGTATGGGTCACCTAATCCCAATGGTTGAATTTGCAAAAACACTTGCAACCAAACACAATCTCTCTGCAACTTTCATCATCACAAACGATGGCCCTTTATCAAATTTACAACATGAATTTCTCGACTCACTACAAAATCCCATGAATTACATCCTCCTCCC

ACCTGTTAATTTTGATGATTTGCCTCCAGATACCAAAATCGAGACCCGAATAAGCCTCATGGTGACCCGATCCATTACTCCTCTTCGTGAAACCATGAACTCCATGATTGCAGACAAAAAGATTGTTGCTTTGTTTGCTGATCTGTTTACAACTGATGCATTCGATGTCGCTATTGAATTCAGTGTCCTGCATTATCTGTTCTTTCCGGCATCCGCCATGACTTTGTCTCTGTTTCTTCATTTGCCAAAACTTGATCAAATGATTTCTGGACCATATAAGGACATACCCGACCCGATTCAGTTCCCAGGTTGCATAACGGTTCATGGTAAGGACCTGCTTGACCCGGTTCAAGATAGGGATAATGATGCATACAAATGGTTACTACACAATGTAAAGAGG

TATACTATGGCTAAGGGTATAGTGGTAAATAGCTTCAAGGAGTTGGAGAGTGGAGCTATTGAAGCTTTACAACATGAGGCACCGGGTAACCCACCGGTTTACCCGGTTGGACCATTAATACGGCTAGGATCAGTTGAGTCTACTAAGGATGTAAACGAGTTGAGCTGTTTAAGATGGCTCGACGATCAGCCACGTGGGTCTGTTTTGTATATTAGTTTTGGGAGTGGTGGGACCCTTTCTTCGGAACAAATCAACGAGTTAGCCATGGGTTTGGAGTTGAGCGAGCAAAGGTTCATATGGGTGGTTAGAACCCCGAATGATAAAATTGCCGATGCTACATACTTCAATACCAATTGTCAAAATGACACTTTTGACTTCTTACCAAAAACATTTTTGGAAAGAACAAAAGGTTATGGGCTGGTGGTGCACAATTGGGCACCACAAGCCCAAATCTTGAGTCATAGCTCAACAGGTGGGTTTATGACTCACTGTGGTTGGAACTCGATTCTTGAAACAATAGTTCACGGGGTACCAATGATCGGTTGGCCACTTTATGCAGAACAAAAGATGAACGCTATAATGTTGACCGAGGGTCTGAAAATTGCGTTGAGGGCTAATACGAATGAAAATGGCATGGTCGATCGTTTAGAGATTGTTCGGGTCGTCAAGGGTTTATTGGAAGGAGGGAAAGAGATTCGAATTCGAACTCAAGAGCTTAAAGAAGCGGCTGCGAGTGTTCTAAGCAAAGATGGATGTTCAACAAAAACACTAGATCAACTG

MEKPPHIAIVPSPGMGHLIPMVEFAKTLATKHNLSATFIITNDGPLSNLQHEFLDSLQNPMNYILLPPVNFDDLPPDTKIETRISLMVTRSITPLRETMNSMIADKKIVALFADLFTTDAFDVAIEFSVLHYLFFPASAMTLSLFLHLPKLDQMISGPYKDIPDPIQFPGCITVHGKDLLDPVQDRDNDAYKWLLHNVKRYTMAKGIVVNSFKELESGAIEALQHEAPGNPPVYPVGPLIRLGSVESTKDVNELSCLRWLDDQPRGSVLYISFGSGGTLSSEQINELAMGLELSEQRFIWVVRTPNDKIADATYFNTNCQNDTFDFLPKTFLERTKGYGLVVHNWAPQAQILSHSSTGGFMTHCGWNSILETIVHGVPMIGWPLYAEQKMNAIMLTEGLKIALRANTNENGMVDRLEIVRVVKGLLEGGKEIRIRTQELKEAAASVLSKDGCSTKTLDQL

SrUGT73C1

ATGGCTTTAGATGAGTCACATGAACCCAACCAACTTCACTTTCTTGTTATACCCTTAGGATCTCCAGGCCACTATATCCCAACCATTGATTTAGCCAAATTACTAGCTCAACATGGTGTTAGAGTCACAATAATCACCACACCGGTCAACGCAATCAGATTCGGGTCAATCCTTGATCAAGCAATCAAATCGGGTCTTCCCATTAATTTTCTTGAATTTCAGTTACCATATCTGAAGTTTGGTATTCCAGAAGGTTGTGAATGCATGGATGATCTTCCTAATATTGGATTAGTCAATGATTTTTTTCTTGCCCATAGTTCACTTCAACAAGAAGTTGAACAATATATTGAAAAGCTTGATTCTAAACCAAGTTGCATACTTTCAAGCACATATATTCTTTGGACAGATGAAACATCAAAAAAATTTAAGATTCCAAAGATTGTGTTTGATGGAATGAATTGCTTCACTCAAATGTGTAACCGCGTTTTATACCTCTCAAAGGTATATGAAAGTGTCAACGAGTCGGATTATTTTGTTTTGCCTGGGTTGCCTGATCATATTGAACTAACAAGATCGCAACTAGCCTTCATATTCAATTCAGGTTCCAAAGACGTAAAGGATTATAGGGAAAAGCTTCGGGTATCGGAGTCCGAAGCATTTGGGATAGTTATAAACAGTTTTCAGGAGTTGGAACAAGAATATGTTGATGCATATCAAAAAGTCAAAGAAGATAAAGCTTGGTGCATAGGGCCATTATCTCTATGCCACAAGGATGCATCCGAGAAGGTCCAAAGAGGTAACAAGTCCTCAATTGACAAAAATGAATGCATCAAGTGGCTAGATTCTCAAGAAAACGAATCGGTGATATACACATGTTTAGGTAGCATTAGTCGCCTTGAGCCTACACAACTCATAGAGCTCGCTTTAGGTCTAGAGTCATCAAAAAAACCATTCATTTGGGTGGTTCGAGCTGGTCATAAGACTGAGAAGATAGAAAAGTGGATAGATGAAGAGGGGTTTGAACAAAGAACCAAAGATAGAGGTCTACTGATCCGCGGGTGGGCTCCACAACTGCTAGTGTTGTCACACCCTGCAATTGGTGCGTTTTTGACTCATTGCGGTTGGAACTCGGCTCTAGAAGGGATATCTGCTGGTGTCCCTATGGTAACATGGCCTCAGTTTCAAGAACAATTTTACAATGAGAAGTTACTTGTACAAGTATTAAAAATTGGCGTTAGTGTTGGCGCGCAAAAAGTTGTGCATTGGGGTGAAGAAGAAAAGTCGGGAGTGGTAGTAAAGAGTGAGGAATTTATAAAGGCTATAGAGCTGGTGATGGAAGATGGGAAAGAAAGTGAAGATAGAAGAAAGAGAGCTAAAGAACTTGGTAAGATGGCTAATGAAGCAATAGAAGATGGAGGATCTTCTCACCGGAATATGACACGATTAATCCAAGATATTAGGAACCTATCATGTGCAAACAATTCAAGCTAA

MALDESHEPNQLHFLVIPLGSPGHYIPTIDLAKLLAQHGVRVTIITTPVNAIRFGSILDQAIKSGLPINFLEFQLPYLKFGIPEGCECMDDLPNIGLVNDFFLAHSSLQQEVEQYIEKLDSKPSCILSSTYILWTDETSKKFKIPKIVFDGMNCFTQMCNRVLYLSKVYESVNESDYFVLPGLPDHIELTRSQLAFIFNSGSKDVKDYREKLRVSESEAFGIVINSFQELEQEYVDAYQKVKEDKAWCIGPLSLCHKDASEKVQRGNKSSIDKNECIKWLDSQENESVIYTCLGSISRLEPTQLIELALGLESSKKPFIWVVRAGHKTEKIEKWIDEEGFEQRTKDRGLLIRGWAPQLLVLSHPAIGAFLTHCGWNSALEGISAGVPMVTWPQFQEQFYNEKLLVQVLKIGVSVGAQKVVHWGEEEKSGVVVKSEEFIKAIELVMEDGKESEDRRKRAKELGKMANEAIEDGGSSHRNMTRLIQDIRNLSCANNSS

SrUGT73C2

ATGGCTTTAGAAGAATCACAAGAACCCAACCAACTTCACTTTCTTGTAATACCCTTAGGATCTCCAGGTCACTATATCCCAACCATTGATTTATCCAAATTACTAGCTCAACATGGAGTTAGAGTCACCATAGTCACCACCCCGGTTAACGCCGTCAGATTCGGGTCAATCCTTGATCAAGCAATCAGATCGGGTCTTCCCATTAGTTTTCTTGAATTTCGGTTACCATATATGAAGTTTAACATACCAGAAGGTTGTGAATGCTTAGATGATGTTCCTAATATTGGGTCAGCCCATGATCTTTTTCTTGCACATAGTTCACTGCAACAAGAAGTTGAAGAATATATTGAAAAGCTTGATCATAAACCAAGTTGCATACTTTCAGGCACATATCTTTTATGGACAAGTGAAACTGCAAAAAAGTTTCAGATTCCAAGGATTGTGTTTGATGGAATGAATTGCTTCACTCAGATGTGTAACCATGTTTTATACATCTCAAAGGTGTATGAAAGTGTTAGTGAGTCAGAATCTTTTGTGTTACCCTGTTTGCCTGATCGTATTGAACTAACAAGATCCCAACTATCTTTTGTATTCAATTCGGGCTCCAAAGACGTGAAGGATTTAAGTGAGAAGCTTCGGGTATCGGAGTCCGAAGCGTTTGGTATAGTTATAAATAGTTTTCATGAGTTGGAGCAAGAATATGTTGAGGCATATCAAAAAGTCAAAGAAGATAAAGCTTGGTGCATAGGGCCATTATCTCTATGCCACAAGGATGTATCCGAGAAAGTCCAAAGAGGTAACAAGTCCTCAATTGACAAAGATGAATGCATCAAGTGGCTCGATTCTCAAGAAAATGAATCGGTAATCTATGTGTGTTTAGGTAGCATCAGTCGCCTTGAGCCTTCACAGCTCATAGAGCTTGCTTTAGGTCTTGAGTCATCAAAAAGACCGTTCATTTGGGTGGTTCGAGCCGGCCACAAGACTGAGAAGATAGAAAAGTGGATAGAAGAAGAGGGGTTTGAAGAGAGAACCAAAGATAGAGGTCTATTGATCCGCGGGTGGGCTCCACAAGTGCTAATACTGTCACACCCTGCAGTTGGTGCGTTTTTGACTCACTGTGGTTGGAACTCAGCTCTCGAAGGGATATCTGCGGGTGTCCCTATGGTGACGTGGCCTCAGTTTCAAGAACAATTTTACAATGAGAAGTTGCTCGTACAAGTGTTGAGAATTGGCGTTAGTGTTGGCGCGCAAAAAGTTGTGCATTGGGGTGAAGAAGAAAAGTCAGGAGTGGTAGTAAAGAGTGAGGAATTTAGTAAGGCTATAGAGATGATGATGGAAGATGGGAAAGAAAGTGAAGATAGAAGAAAGAGAGCCAAAGATCTTGGTAAGATGGCAAATGAAGCAGTTGAAGAAGGAGGATCTTCTCACCGGAATATGACACGATTAATCCAAGATATTAGGAACCTATCTAGTACAAGGAATTCAAGCTAA

MALEESQEPNQLHFLVIPLGSPGHYIPTIDLSKLLAQHGVRVTIVTTPVNAVRFGSILDQAIRSGLPISFLEFRLPYMKFNIPEGCECLDDVPNIGSAHDLFLAHSSLQQEVEEYIEKLDHKPSCILSGTYLLWTSETAKKFQIPRIVFDGMNCFTQMCNHVLYISKVYESVSESESFVLPCLPDRIELTRSQLSFVFNSGSKDVKDLSEKLRVSESEAFGIVINSFHELEQEYVEAYQKVKEDKAWCIGPLSLCHKDVSEKVQRGNKSSIDKDECIKWLDSQENESVIYVCLGSISRLEPSQLIELALGLESSKRPFIWVVRAGHKTEKIEKWIEEEGFEERTKDRGLLIRGWAPQVLILSHPAVGAFLTHCGWNSALEGISAGVPMVTWPQFQEQFYNEKLLVQVLRIGVSVGAQKVVHWGEEEKSGVVVKSEEFSKAIEMMMEDGKESEDRRKRAKDLGKMANEAVEEGGSSHRNMTRLIQDIRNLSSTRNSS

SrUGT73C3

ATGGCTTTAGAAGAATCACAAGAACTAAACCACCTTCACTTTCTTGTTATACCCATTGGATCTCCAGGGCACTACATCCCAACAATTGATATGTCCAAGTTACTAGCTCAACACGGCATTAGAGTCACCATAGTCACCACCCCGGTCAATACCCTAAGATTCGGGTCAATCCTTGATCAAGCAATCCAATCAGGTCTTTCGATCCATTTTCTTGAATTCCCGTTTCCATATAAGGAGTTTGGTTTACCCGAAGGATGTGAAAGCATAGATGATCTTCCTTATATGGGGCTCACAAGTGCACTTATGCAAGCCTATGCTTCATTACAAAAAGAAGTTGAACAATATCTTGAAAATCTTAATCCTAAGCCTAACTGCATACTTTCAGACACATTTCTCCTATGGCCAGGTGAAATAGCAAAAAGGTTTGAGATCCCAAGAATTCTATTTGATGGGATGAATTGCTTTACTCAGATGTGTAACCATGTATTATACCTCTCAAAGGTGTATGAAACAGTGGGTGAGTCGGATTCATTCGTTTTGCCTGATTTGCCTGATTTGCCTGACCGTATTGAGCTAACAAGATCTCAACTTCCTTTTGCATTCAACCCGACACTTAAAGGTATGAGTGATTTCAATGAAAAGCTTCGGGTATCTGAATCCGAAGCGTATGGGGTAGTTGTAAATAGTTTTGAGGAGTTGGAACAAAGATATGTTGATGAATATCAGAAAGTTAAAGAAGGTAAAGTTTGGTGCATAGGGCCATTATCACTATGCCACAATGATGAATCAGATAAGGTCCA

AAGAGGTAACAAGTCATCAATCAACAAACACGAGTGTCTCAATTGGCTCGATTCTCAAGAAAACGGTTCAGTGATCTATGCTTGTTTAGGAAGCATTAGTCGGGTTGAGCCTGCACAGCTCACAGAGCTTGCTTTAGCTCTAGAAGCATCGAAAAGACCGTTCATATGGGTGGTTCGAGCAGGTCATAAGACTGAGATGATAGAAAAATGGATAGATGAAGAGGGGTTTGAAGAAAGGACCAAAGATAAAGGTCTATTGATCCGTGGGTGGGCACCACAACTGCTAGTGTTGTCACACCCTGCGATTGGAGGGTTTTTAACACATTGTGGATGGAACTCGACTCTAGAAGGGATTTGTGCTGGTGTCCCTTTGGTAACATGGCCTCAGTTTCAAGAACAATTTTACAATGAGAAGTTAGTTGTGCAAGTGTTGAGAATTGGAGTTAGTGTTGGTGCTCAAAAAAGCGTGTTTTGGGGTGATGGAGATAAGTCTGGAGTGGTAAAGAGTGAGGCTTTTGTAAAGGCTATAGAGATTGTAATGGAAGACGGGGAAGAAGGTGATGAGAGAAGAAAGAGAGCGAAAGAACTTGGTAAGATGGCGAATAAAGCAGTAGAAGAGGGAGGATCTTCGGACCGAAATATTACTCGACTAATTGAAGATTTCAAGAACCAAGCAAGATCTAGGAATTAA

MALEESQELNHLHFLVIPIGSPGHYIPTIDMSKLLAQHGIRVTIVTTPVNTLRFGSILDQAIQSGLSIHFLEFPFPYKEFGLPEGCESIDDLPYMGLTSALMQAYASLQKEVEQYLENLNPKPNCILSDTFLLWPGEIAKRFEIPRILFDGMNCFTQMCNHVLYLSKVYETVGESDSFVLPDLPDLPDRIELTRSQLPFAFNPTLKGMSDFNEKLRVSESEAYGVVVNSFEELEQRYVDEYQKVKEGKVWCIGPLSLCHNDESDKVQRGNKSSINKHECLNWLDSQENGSVIYACLGSISRVEPAQLTELALALEASKRPFIWVVRAGHKTEMIEKWIDEEGFEERTKDKGLLIRGWAPQLLVLSHPAIGGFLTHCGWNSTLEGICAGVPLVTWPQFQEQFYNEKLVVQVLRIGVSVGAQKSVFWGDGDKSGVVKSEAFVKAIEIVMEDGEEGDERRKRAKELGKMANKAVEEGGSSDRNITRLIEDFKNQARSRN

SrUGT73C4

ATGGCTTTAGAAGAATCACAAGAACCCAACCAACTTCACTTTCTTGTAATACCCTTAGGATCTCCAGGTCACTATATCCCAACCATTGATTTATCTAAATTACTAGCTCAACATGGAGTTAGAGTCACCATAGTCACCACCCCGGTTAACGCCGTCAGATTCGGGTCAATCCTTGATCAAGCAATTCAATCGGGTCTTCCCATTAGTTTTCTTGAATTTCGGTTACCATATATGAAGTTTAACATACCAGAAGGTTGTGAATGCTTGGATGATGTTCCTAATATTGGGTCAGCCCATGATCTTTTTCTTGCACATAGTTCACTGCAACAAGAAGTTGAAGAATATATTGAAAAGCTTGATCATAAACCAAGTTGCATACTTTCAGGCACATATCTTTTATGGACAAGTGAAACTGCAAAAAAGTTTCAGATTCCAAGGATTGTGTTTGATGGAATGAATTGCTTCACTCAGATGTGTAACCATGTTTTATACATCTCAAAGGTGTATGAAAGTGTTAGTGAGTCAGAATCTTTTGTGTTACCCGGTTTGCCTGATCGTATTGAACTAACAAGACCCCAACTATCTTTTGTATTCAATTCGGGCTCCAAAGACGTGAAGGATTTCAGTGAGAAGCTTCGGGTATCGGAGTCCGAAGCGTTTGGTATAGTTATAAATAGTTTTCATGAGTTGGAGCAAGAATATGTTGAGGCATATCAAAAAGTCAAAGAAGATAAAGCTTGGTGCATAGGGCCATTATCTCTATGCCACAAGGATGTATCCGAGAAAGTCCAAAGAGGTAACAAGTCCTCAATTGACAAAGATGAATGCATCAAGTGGCTCGATTCTCAAGAAAATCAATCGGTAATCTATGTGTGTTTAGGTAGCATCAGTCGCCTTGAGCCTTCACAGCTCATAGAGCTTGCTTTAGGTCTTGAGTCATCAAAAAGACCGTTCATTTGGGTGGTTCGAGCCGGCCACAAGACTGAGAAGATAGAAAAGTGGATAGATGAAGAGGGGTTTGAAGAGAGAACCAAAGATAGAGGTCTATTGATCCGCGGGTGGGCTCCACAAGTGCTAATACTGTCACACCCTGCAGTTGGTGCGTTTTTGACTCACTGTGGTTGGAACTCAGCTCTCGAAGGGATATCTGCAGGTGTCCCTATGGTGACGTGGCCTCAGTTTCAAGAACAATTTTACAATGAGAAGTTGCTCGTACAAGTGTTGAGAATTGGCGTTAGTGTTGGCGCGCAAAAAGTTGTGCATTGGGGTGAAGAAGAAAAGTCAGGAGTGGTAGTAAAGAGTGAGGAGTTTACTAAGGCTATAGAGATGATGATGGAAGATGGGAAAGTGTTAAAATATAAGTGGTTCTTTGTCATATTAATGGGCTATTTATTTCTTCTCCATGCAGGCTTGGGCTCTCTACTAAGCCCAGCTTTCTCATCCAAAATAAGGAGCTGA

MALEESQEPNQLHFLVIPLGSPGHYIPTIDLSKLLAQHGVRVTIVTTPVNAVRFGSILDQAIQSGLPISFLEFRLPYMKFNIPEGCECLDDVPNIGSAHDLFLAHSSLQQEVEEYIEKLDHKPSCILSGTYLLWTSETAKKFQIPRIVFDGMNCFTQMCNHVLYISKVYESVSESESFVLPGLPDRIELTRPQLSFVFNSGSKDVKDFSEKLRVSESEAFGIVINSFHELEQEYVEAYQKVKEDKAWCIGPLSLCHKDVSEKVQRGNKSSIDKDECIKWLDSQENQSVIYVCLGSISRLEPSQLIELALGLESSKRPFIWVVRAGHKTEKIEKWIDEEGFEERTKDRGLLIRGWAPQVLILSHPAVGAFLTHCGWNSALEGISAGVPMVTWPQFQEQFYNEKLLVQVLRIGVSVGAQKVVHWGEEEKSGVVVKSEEFTKAIEMMMEDGKVLKYKWFFVILMGYLFLLHAGLGSLLSPAFSSKIRS

SrUGT73E1-1

ATGGTGGCACCACCAACCAACCTTCATTTTGTTTTGTTTCCTCTTATGGCTCAAGGCCATCTGGTACCCATGGTCGACATCGCTCGAATCTTAGCCCAACGTGGTGCAACGGTCACCATAATCACCACACCCTACCATGCCAACCGGGTCAGACCGGTTATCTCCCGAGCCATCGCGACCAATCTCAAGATCCAGCTACTCGAACTCCAACTGCGGTCAACCGAAGCCGGTTTACCCGAAGGGTGCGAAAGCTTCGACCAACTTCCGTCATTCGAGTACTGGAAAAATATTTCAACCGCTATCGATTTGTTACAACAACCCGCTGAAGATTTGCTCCGAGAACTTTCACCACCACCCGATTGCATCATATCGGACTTTTTGTTCCCGTGGACCACCGATGTGGCTCGACGGTTAAACATCCCCCGGCTCGTGTTCAATGGACCGGGCTGCTTTTATCTCTTGTGCATCCATGTTGCGATCACTTCCAACATTTTGGGAGAGAATGAACCGGTCAGTAGTAATACCGAGCGCGTTGTGCTGCCCGGTTTACCTGACCGGATCGAAGTCACTAAACTTCAGATCGTCGGTTCGTCGAGACCAGCCAACGTAGACGAAATGGGCTCGTGGCTTCGAGCCGTAGAAGCTGAGAAAGCTTCATTCGGGATAGTGGTTAATACTTTCGAAGAGCTTGAACCGGAGTACGTTGAAGAATACAAAACGGTTAAAGATAAGAAGATGTGGTGTATCGGCCCGGTTTCGTTATGCAACAAAACCGGGCCGGATTTAGCCGAGCGAGGAAACAAAGCTGCAATAACCGAACACAACTGCTTAAAATGGCTCGATGAGAGAAAACTGGGGTCCGTGTTATACGTTTGTTTAGGTAGCCTTGCACGCATTTCTGCCGCACAAGCAATCGAGCTCGGGTTAGGACTCGAGTCCATAAACCGTCCCTTTATATGGTGCGTAAGAAACGAAACCGATGAGCTCAAAACATGGTTTTTGGATGGGTTTGAAGAAAGGGTTAGAGATCGCGGGTTGATCGTTCATGGTTGGGCGCCACAGGTTTTGATACTGTCGCACCCAACCATTGGCGGTTTCTTAACCCATTGCGGTTGGAACTCGACTATTGAATCGATTACCGCGGGTGTTCCAATGATCACGTGGCCATTTTTTGCGGACCAGTTTTTGAATGAAGCTTTTATAGTTGAAGTTTTGAAGATTGGAGTTAGGATTGGTGTTGAGAGGGCTTGTTTGTTTGGGGAAGAAGATAAGGTTGGAGTGTTGGTGAAGAAGGAGGATGTGAAGAAGGCTGTTGAATGCTTGATGGATGAAGATGAAGATGGTGATCAGAGAAGAAAGAGGGTGATTGAGCTTGCAAAAATGGCGAAGATTGCAATGGCGGAAGGTGGATCTTCTTATGAAAATGTATCGTCGTTGATTCGAGATGTGACTGAAACAGTTAGAGCACCACATTAG

MVAPPTNLHFVLFPLMAQGHLVPMVDIARILAQRGATVTIITTPYHANRVRPVISRAIATNLKIQLLELQLRSTEAGLPEGCESFDQLPSFEYWKNISTAIDLLQQPAEDLLRELSPPPDCIISDFLFPWTTDVARRLNIPRLVFNGPGCFYLLCIHVAITSNILGENEPVSSNTERVVLPGLPDRIEVTKLQIVGSSRPANVDEMGSWLRAVEAEKASFGIVVNTFEELEPEYVEEYKTVKDKKMWCIGPVSLCNKTGPDLAERGNKAAITEHNCLKWLDERKLGSVLYVCLGSLARISAAQAIELGLGLESINRPFIWCVRNETDELKTWFLDGFEERVRDRGLIVHGWAPQVLILSHPTIGGFLTHCGWNSTIESITAGVPMITWPFFADQFLNEAFIVEVLKIGVRIGVERACLFGEEDKVGVLVKKEDVKKAVECLMDEDEDGDQRRKRVIELAKMAKIAMAEGGSSYENVSSLIRDVTETVRAPH

SrUGT73F1

ATGGCTTCTCATCCCACAAATCTTCACTTTGTCTTGTTTCCTTTGATGGCTCAAGGTCATATGATTCCTATGGTAGACATGGCCCGTATACTAGCGGAACATGGTTCTATGGTTACTATAATCTCAAGCCCAGTTAACGCTAACCGCTTTAAGTCGATTATTGATCGTGCAGTTGAAGCTAAGCTCAAGATCCAGATTCTTGAACTCGGACTCCCACTAGCTGAGGTTGGTTTGCCGGAAGGAAGTGAGAATTTTGACTTGCTGCCATCAGTTGCCCACGTAGATAAATTGTACATAGCAATGCGTATGATAGAAGAACCAGCAGAAAACTTGCTCCGGGGTCTATGTCCGTCTCCAAGTTGCATCATCTCAGATGGTTGCTTTCCCTGGACTAATGACATCGCAAAGAGGTTGAATATTCCACGAGTTGTTTTCTATGGACCTGGATGTTTCTCATTCTTATGCATACACATAGCGACAAATACAAATATACTAGAAGAAATTGCATCTGACTCTGAATACTTTGTGATGCCTGGCTTGCCTGACCAGATTAAAGTCACCAAACCGCAGGTTGCAACTTGGGGGAGAGGAGGCTCAAAAGAATCCAACGCCGTTTTTGAAAAAATGCAAGAAGCCGAGAAAGATACAATAGGGATTGTGGTGAATAGCTTTGAGGAGTTGGAGCCCAAGTATGTTGAGGAATTTACAAAAGCAAAGGATAAAAAGGTGGGGTGCATTGGCCCGGTTTCACTGTGCAACAAAAGTTTCAAAGATAGAGTTGAGAGAGGAAACAAGACCGCAGTAAACGAGCATGATTGTTTGAAATGGCTCGACTCAAGAGAGTCAGGGTCAGTGGTTTATGTTTGCTTGGGTAGCCTATCATATGATTCCACTGAACAAGCCATTGAGCTTGGGTTGGGACTCGAGTCATCAAACATACCTTTTCTTTGGTTCGTAAGGAAAACAAGAGACGATTTTGAGACATGGCTCTCCAAAGAAGGATATGAAGAAAGGATAAAAGGTAGAGGCCTACTGATCCGTGGTTGGGCTCCACAAATCTTGATTTTGTCACATAAAGCAATCGGCGGTTTCGTAACACACTGTGGATGGAACTCGACTCTCGAAGGGATTTCGGCTGGGATGCCGATGGTTACATGGCCACATTTCGCAGAGCAATTTCTTAACGAGCGATTTATCATAGATGTGTTGAAGATTGGTGTGAGAATTGGGATGGAGGTTCCTATTATGTTCAAAAACCTAGACGAGTCAAAAGAGACACTGAAGAGGGATAATGTTAGGGAAGCTGTAGAACGCCTGATGAAAAACGATGAGGAAGGAGAAGCAAGAAGAAAGAGAGCTAGGGAGTTAAGGGAAATGGCGGAGAAAGCAATGGAAGAAGGGGGCTCATCTCACCATAATATGACATTGATGATTCAAGCAATTACCAAAGAGTTAGCCAAGAACACTAAACCGATTCAAGATATTGTGTAG

MASHPTNLHFVLFPLMAQGHMIPMVDMARILAEHGSMVTIISSPVNANRFKSIIDRAVEAKLKIQILELGLPLAEVGLPEGSENFDLLPSVAHVDKLYIAMRMIEEPAENLLRGLCPSPSCIISDGCFPWTNDIAKRLNIPRVVFYGPGCFSFLCIHIATNTNILEEIASDSEYFVMPGLPDQIKVTKPQVATWGRGGSKESNAVFEKMQEAEKDTIGIVVNSFEELEPKYVEEFTKAKDKKVGCIGPVSLCNKSFKDRVERGNKTAVNEHDCLKWLDSRESGSVVYVCLGSLSYDSTEQAIELGLGLESSNIPFLWFVRKTRDDFETWLSKEGYEERIKGRGLLIRGWAPQILILSHKAIGGFVTHCGWNSTLEGISAGMPMVTWPHFAEQFLNERFIIDVLKIGVRIGMEVPIMFKNLDESKETLKRDNVREAVERLMKNDEEGEARRKRARELREMAEKAMEEGGSSHHNMTLMIQAITKELAKNTKPIQDIV

SrUGT73G1

ATGGCTTTGGAATCAGTCAACCAGCTTCACTTCCTCCTGATCCCCTTTCTAGCTCCTGGTCACACCATCCCCATGATCCACATGGCCAAATTGCTCGCACAACGACCAAATGTGATGGTCACCATCGTCACCACACCCGTAAACGCGATTCGATATGGTTCTACGCTTCAAGAACACATCGAATCCGGACTCCCGGTGTGTTTTCTTGAACTTCCATTTCCGGCGACCGAGAATGGACTTCCGGAGGGATGCGAAAGTGTAGATGCTCTACATTGTCTAGAATTACTTCCAAACTTTTCGGCTGCAGTTGACACGTTACAAGAACGACTCGAGCAACGGTTCGAATCGATTAACCCACGTCCGAACTGTATTATATCTGATAAATACATGGTCTGGAGTGATTATACAGCAGCAAAGTATGAGATTCCCAGGATCATATTCGATGGGATGAGTTGTTTCAAACAACTATCTACACATCATTTGTATGCATCTAAGGTGTTCGATGATATGCCTGAGTCAGAACCATTTGTTCTCCCTGGATTGCCTGACAAGATCGAGATCACCCGAGCTCAACTGCCAGCAGAGTTCAATCATAGCCGTGGTGTAATGCGTGAGCAAATTGAACGAGTGAGAGAAACCGAGTCGAGAGCTTACGGAATGGTGATCAATAGTTTTGAGGAGTTGGAGCAAGAGTATGTTAAGGAACTTAAGAAGTTTAAAGGCGGTAAGATTTGGTGTTTAGGACCGTTATCATTATCTAACAATCATGATTCGAGTACATCTATTGATGATCAACGTTACTTGAAATGGCTCGATTCTAAAGAACCAGGATCGGTTGTGTATGCCTGCTTCGGTAGCAGTAGTCAAGTCACGCCCCCACAACTCATCGAGCTTGGGTTAGCATTGGAAGCATCCAAATCCCCGTTCATATGGGTGATTCGAGCCGGTGACAAAGTTAAAGAGGTCGAGAAATGGTTAATAGAAAGTGAGTTTGAAACTCGAGTAAAAGACAGAGGTCTTGTAGTCAGAGACTGGGCACCACAAATCTTAATCTTGTCCCACCGTTCGGTTGGAGGGTTCTTGACACACTGCGGTTGGAATTCAGTGTTGGAAGGGGTTTCGGCTGGTGTCCCTATGATCACGTGGCCTTTGTTTGCAGAACAATTCTTGAACGAGAAGTCGATAGTTCAAGTTTTGGGTGTCGGTGTTAGTGTTGGTGCTCCCGGTGTGGTGCACTGGGGCCAAGAAGACGAATTTGGGGTCACCGTGAAAAGCGAGCAGGTGAAAACAGCTATAGAAACAGTAATGGATGTCGGATCCGAAGGAAATGAGAGAAGAAAGAAGGCGAAATCACTTGCAATGGTAGCAAAAAAAAGCCATTGA

MALESVNQLHFLLIPFLAPGHTIPMIHMAKLLAQRPNVMVTIVTTPVNAIRYGSTLQEHIESGLPVCFLELPFPATENGLPEGCESVDALHCLELLPNFSAAVDTLQERLEQRFESINPRPNCIISDKYMVWSDYTAAKYEIPRIIFDGMSCFKQLSTHHLYASKVFDDMPESEPFVLPGLPDKIEITRAQLPAEFNHSRGVMREQIERVRETESRAYGMVINSFEELEQEYVKELKKFKGGKIWCLGPLSLSNNHDSSTSIDDQRYLKWLDSKEPGSVVYACFGSSSQVTPPQLIELGLALEASKSPFIWVIRAGDKVKEVEKWLIESEFETRVKDRGLVVRDWAPQILILSHRSVGGFLTHCGWNSVLEGVSAGVPMITWPLFAEQFLNEKSIVQVLGVGVSVGAPGVVHWGQEDEFGVTVKSEQVKTAIETVMDVGSEGNERRKKAKSLAMVAKKSH

SrUGT73G2

ATGGCTTTGGAATCAGTCAACCAGCTTCACTTCCTCCTGATCCCCTTTCTAGCTCCTGGTCACACCATCCCCATGATCCACATGGCCAAATTGCTCGCACAACGACCAAATGTGATGGTCACCATCGTCACCACACCCGTAAACGCGATTCGATATGGTTCTACGCTTCAAGAACACATCGAATCCGGACTCCCGGTGTGTTTTCTTGAACTTCCATTTCCGGCGACCGAGAATGGACTTCCGGAGGGATGCGAAAGTGTAGATGCTCTACATTGTCTAGAATTACTTCCAAACTTTTCGGCTGCAGTTGACACGTTACAAGAACGACTCGAGCAACGGTTCGAATCGATTAACCCACGTCCGAACTGTATTATATCTGATAAATACATGGTCTGGAGTGATTATACAGCAGCAAAGTATGAGATTCCCAGGATCATATTCGATGGGATGAGTTGTTTCAAACAACTATCTACACATCATTTGTATGCATCTAAGGTGTTCGATGATATGCCTGAGTCAGAACCATTTGTTCTCCCTGGATTGCCTGACAAGATCGAGATCACCCGAGCTCAACTGCCAGCAGAGTTCAATCATAGCCGTGGTGTAATGCGTGAGCAAATTGAACGAGTGAGAGAAACCGAGTCGAGAGCTTACGGAATGGTGATCAATAGTTTTGAGGAGTTGGAGCAAGAGTATGTTAAGGAACTTAAGAAGTTTAAAGGCGGTAAGATTTGGTGTTTAGGACCGTTATCATTATCTAACAATCATGATTCGAGTACATCTATTGATGATCAACGTTACTTGAAATGGCTCGATTCTAAAGAACCAGGATCGGTTGTGTATGCCTGCTTCGGTAGCAGTAGTCAAGTCACGCCCCCACAACTCATCGAGCTTGGGTTAGCATTGGAAGCATCCAAATCCCCGTTCATATGGGTGATTCGAGCCGGTGACAAAGTTAAAGAGGTCGAGAAATGGTTAATAGAAAGTGAGTTTGAAACTCGAGTAAAAGACAGAGGTCTTGTAGTCAGAGACTGGGCACCACAAATCTTAATCTTGTCCCACCGTTCGGTTGGAGGGTTCTTGACACACTGCGGTTGGAATTCAGTGTTGGAAGGGGTTTCGGCTGGTGTCCCTATGATCACGTGGCCTTTGTTTGCAGAACAATTCTTGAACGAGAAGTCGATAGTTCAAGTTTTGGGTGTCGGTGTTAGTGTTGGTGCTCCCGGTGTGGTGCACTGGGGCCAAGAAGACGAATTTGGGGTCACCGTGAAAAGCGAGCAGGTGAAAACAGCTATAGAAACAGTAATGGATGTCGGATCCGAAGGAAATGAGAGAAGAAAGAAGGCGAAATCACTTGCAATGGTAGCAAAAAAAGCCATTGAAGAAGGGGGATCTTCTCACTATAACTTGATGTTACTAATACAAGATATATTGGAACATATAAATGCTAGAACCCATAAGCCAGAAACTACTTATTGTAGCTAA

MALESVNQLHFLLIPFLAPGHTIPMIHMAKLLAQRPNVMVTIVTTPVNAIRYGSTLQEHIESGLPVCFLELPFPATENGLPEGCESVDALHCLELLPNFSAAVDTLQERLEQRFESINPRPNCIISDKYMVWSDYTAAKYEIPRIIFDGMSCFKQLSTHHLYASKVFDDMPESEPFVLPGLPDKIEITRAQLPAEFNHSRGVMREQIERVRETESRAYGMVINSFEELEQEYVKELKKFKGGKIWCLGPLSLSNNHDSSTSIDDQRYLKWLDSKEPGSVVYACFGSSSQVTPPQLIELGLALEASKSPFIWVIRAGDKVKEVEKWLIESEFETRVKDRGLVVRDWAPQILILSHRSVGGFLTHCGWNSVLEGVSAGVPMITWPLFAEQFLNEKSIVQVLGVGVSVGAPGVVHWGQEDEFGVTVKSEQVKTAIETVMDVGSEGNERRKKAKSLAMVAKKAIEEGGSSHYNLMLLIQDILEHINARTHKPETTYCS

SrUGT73G3

ATGGCGTCGGAACCAGTCAACCAGCTTCACATCCTCATGATCCCCTTGCTAGCTCCGGGGCACACCATCCCCATGATCTCCATGGCTAAATTGCTCTCCCAGCGACAGAACGTGATGGTCACCATCGTCACCACACCACTAAACGCCGTCCGATACGGTCCCAAACTCCAACAACACATCAATTCCGACTTCCCGGTGCGATTCCTTGAACTCCCGTTTCCGGCGACCGAGAACGGACTACCGGAGGGAT

GCGAAAGTGCAGATTCTCTACCGGGTCTGCATCTACTTCCAAACTTTTCAGCTGCAGTTGACACGTTGCAACATAGACTCGAAGAACGATTTGATTCGCTAAACCCTCGACCCATCTGTATTATTTCTGATAAATTCATGCTCTGGAGTGATGATACAGCGACAAAGTATAAGATACCCAGAATCATATTTGATGGAATGAGTTGTTTCAAACAGTTAGCTACTCATCATCTGTATGCATCCAAGGTGTTCGATGAATTGCCTGAGTCAGACCCTTTTGTTCTCCCAGGGTTACCTGACCGAATCGAGTTAACTCGAGCTCAGCTTCCACCAGAGTTCAATGATAGTGGTTTTGCATCGAGTGAGCACCTTGAACGAGTGAGAGAAACCGAGTCCAGATCTTATGGAATGGTGATCAATACTTTTGAGGAATTAGAACAAGAATATGTTAAGGAATTCAAGAGGTTAAAAGGGGGTAAGGTTTGGTGTGTTGGACCATTATCACTATCTAACAATAATGATTCTAGTTACAATGTCTCTACCGATGACCAATCTTACTTAAAATGGCTCGATTCCAAAGACCCTGGTTCAGTCGTCTATGCCTGCTTCGGTAGCAGCAGTCAGATCATCCCTACACAACTCATCGAGCTCGGGTTAGCCCTAGAAGCATCCGGATCCCCATTCATATGGGTGATCAGATCCGGTGACAAAGCTAACGAGATTGAAAAATGGTTATCAGAAAGCAGGTTTGAAACCAGAATCAAAGATAGAGGACTCATAGTCAGAAACTGGGCACCACAATCCCTGATCTTATCACACCATTCGGTTGGTGGGTTCTTGACGCATTGCGGTTGGAATTCAATCTTGGAAGGTGTGTCTGTTGGGGTCCCTATGATCACATGGCCTCAGTTTGCAGAACAGTTTTTGAATGAGAAGTTGATTGTTCAAGTTTTGGGGATTGGTGTGAGTGTTGGTGCTTCGGTTATGGTTCATTGGGGTCAAGAAGACAAATTTGGGGTTACCGTGAAGAGTGAGCAGGTGAAAATGGCTATAGAAACAGTAATGGATGTGGGGCCCGAAGGAAATGCGAGAAGATTGAAAGCAAAGGCGATCGGGATGGTAGCAAAGAAAGCGGTTGAAGAAGGAGGATCTTCTCACCATAACTTGAGTTTACTACTACAAGATCTATTGGAAGTTTCAAATGTTAGAAGCCAAAAGCCATTGATTTGA

MASEPVNQLHILMIPLLAPGHTIPMISMAKLLSQRQNVMVTIVTTPLNAVRYGPKLQQHINSDFPVRFLELPFPATENGLPEGCESADSLPGLHLLPNFSAAVDTLQHRLEERFDSLNPRPICIISDKFMLWSDDTATKYKIPRIIFDGMSCFKQLATHHLYASKVFDELPESDPFVLPGLPDRIELTRAQLPPEFNDSGFASSEHLERVRETESRSYGMVINTFEELEQEYVKEFKRLKGGKVWCVGPLSLSNNNDSSYNVSTDDQSYLKWLDSKDPGSVVYACFGSSSQIIPTQLIELGLALEASGSPFIWVIRSGDKANEIEKWLSESRFETRIKDRGLIVRNWAPQSLILSHHSVGGFLTHCGWNSILEGVSVGVPMITWPQFAEQFLNEKLIVQVLGIGVSVGASVMVHWGQEDKFGVTVKSEQVKMAIETVMDVGPEGNARRLKAKAIGMVAKKAVEEGGSSHHNLSLLLQDLLEVSNVRSQKPLI

SrUGT73G4

ATGGTAGCCAACAAACTCCATTTTCTTTTGGTTCCCTACATAGGTCCTGGCCTTACAATTCCCATGATCGACATGGCCAAACTGCTTGCAAAACAACCGAATGTTACTGTCACCATCGTCACCACACCTCTCAACGCCATCCGCTACGGTGCCAGTCTCGCCGGAGCAATCACCGCCGGACTTCCCGTCCGATTTCTTGAACTCCCGTTTCCGGCAGCAGAGGCTGGCTTGCCTGAAGGGTGTGAAAGTTCAGATAAAATCCCTAGTAGGGATTTAATTCCAAACTTTTTAGCTGCGGTTGACATGTTACAGCAAAAGCTTGAAGAACGATTCGAAATGATAAACCCTCGTCCGAATTGTATCATATCTGATAAGTATATGTCATGGACGGGTGATTTTGCTGATAAGAATCGGTTACCAAGAATCATGTTTGATGGGACGAGTTGTTTTAATGAGTTGTGTTACAATAATTTGTTTGCATGTAAGGTGTTCGACGATTTGCCTGACTCAAAACCATTTGTTGTCCCGGGTTTGCCCGATCGGGTCGAGCTGACAAGAAACCAGCTTCCACCTGAGTTCAACCCGAGTTCGATTGACACGAGTGCGTTTCGCGAGCGGGCTAGAGATGCTGAATTGAGGGCTTATGGTGTGGTGGTCAATAGTTTTGAGGAACTAGAACAAGAATACGTTAACGAGTATAAGAAGTTAAGAGGGGGTAAAGTTTGGTGTATCGGACCATTGTCGCTATGTGATAGTGACGATTCGGTTAAATCTCAAAGAGGAAACGTAGCCTCGATTGGTGAAGAACAATGCCTAAAATGGCTCGATTCTCACGAACCAGATTCAGTAGTTTACGCGTGTTTTGGTAGTCTTGTGAGGATTAACACCCCACAACTTATTGAGCTTGGTTTAGGCCTTGAAGCGTCAAACCACCCGTTCATTTGGGTGATTAATACCGTTCATAGAGAGAAAGAGGTCGAGGAATGGTTAGCAGAAAGTGGGTTCGAGGAGCGGGTCAAACATAGAGGGTTAATAATCCGGGGGTGGGCCCCACAATTGGTAATCTTGTCACATCCTTCTGTTGGAGGGTTCTTAACACATTGTGGTTGGAACTCGACTCTAGAATCCGTGTCTGCTGGTGTTCCCATGATCACATGGCCACAGTTTGCAGAGCAGTTTATTAACGAGAAACTTGTGGTCCAAGTTCTGGGGATCGGTTTCAGTGTTGGAGCTGAATCTGTTGTTCATGTGGTCGAAGAAGATCGGTTTGGAGTGAAAGTTAAGAGTGAGAGTGTGAAGAATGCTATCGAGCGGGTGATGAATGATGAGATTGAAGGAAATGAGGGACGAAAGAGAGCTATAGAGGTCGCTATAATGGCGAATAACGCGATAAAAGAGGAAGGTTCTTCACACTTGAACTTGACCCTGTTGATTCAAGACATAATACACCTTGTAAATACTTCAAGTTAA

MVANKLHFLLVPYIGPGLTIPMIDMAKLLAKQPNVTVTIVTTPLNAIRYGASLAGAITAGLPVRFLELPFPAAEAGLPEGCESSDKIPSRDLIPNFLAAVDMLQQKLEERFEMINPRPNCIISDKYMSWTGDFADKNRLPRIMFDGTSCFNELCYNNLFACKVFDDLPDSKPFVVPGLPDRVELTRNQLPPEFNPSSIDTSAFRERARDAELRAYGVVVNSFEELEQEYVNEYKKLRGGKVWCIGPLSLCDSDDSVKSQRGNVASIGEEQCLKWLDSHEPDSVVYACFGSLVRINTPQLIELGLGLEASNHPFIWVINTVHREKEVEEWLAESGFEERVKHRGLIIRGWAPQLVILSHPSVGGFLTHCGWNSTLESVSAGVPMITWPQFAEQFINEKLVVQVLGIGFSVGAESVVHVVEEDRFGVKVKSESVKNAIERVMNDEIEGNEGRKRAIEVAIMANNAIKEEGSSHLNLTLLIQDIIHLVNTSS

SrUGT73H1

ATGGCTTCTGATCTTCACTTTCTTGTCATACCGTTAATGTGCCCCGGTCATCTCATTCCGATGATCGACATGGTCAAACTCATCGCACAACATTCCGTCACCGTCACCATCGTCATCACTCCGCGAAACGCCGACCGCTACGGTGCCGTCCTCCGGCGAGCCATAGATTCCGGCCTTCCGATCAAACTCCTCCAGATCCGGTTTCCAGCCTCCGACCACGGTCTACCCGACGGATGTGAAAGTGTTGACGATCTACCAACATTTAACCTTTCGAAAAACTTCTTCGATGCATTAGCGACACTTCAAAAACCACTTGAAGATGCGTTAGAGTTTAATGAGCTTGAATCTAAACCAAATTGCATCATTTCCGACAAACATTTAACTTGGACAGCTGATGTCGCTAAAAAGTTTGAAATTCCTTGGGTTATATTCGACGGGATGAGTTGTTTCACTCAATTAGCGACACACAATCTATGTGTTTCCAAGATTTATGAAACGGTAACGGATTTTGATTCTGACATGTTTATCTTGCCCGGGTTACCGGATAAGATATCCATGACCAAATCACAGCTTCCTGGATTGTTTAATCCGGGAAGCAGTGTGAAAGCAAAGGAATTGTTATCCGTGCGCGAAAAGGTTCGCGCAGCAGAGCTAGAAGCGTACGGGACGCTTATAAACAGTTTTGAAGAGTTGGAAACACGGTATATCAATGAGTTTAAGATGCTAAAACAAGGTAAGGTTTGGTGTATTGGTCCGTTTTCGAATTTGAACACGAACGATTTGGATCGAGCACAACGCGGAACCAAAGATTCAATCAACAATGAATGCGTTACATGGCTCGATTCACAACAAAACCGGAGTGTAATCTATGCATCTTTAGGAAGCCTTACTCGGCTAACACCACTACAGTTTATCGAGCTCGCATTAGGGTTAGAAGATTCGCAATTCCCATTTATTTTGGTGGTGAAAGGTGGAAGTAGGACAAAAGAGATAGAGAAATGGTTAGATGAAAGTGGGTACGAGTCGCGAGTGAAAGGAAGAGGGTTTTTGATCCGCGGTTGGGCTTCACAAGTCCTGATCTTATCGGACAGAGCCGTGGGTGCGTTCTTGACTCATTGCGGTTGGAACTCGACTATCGAAGGGGTTTGTGCCGGTGTACCGATGATCACATGGCCGCAGTTTGCCGAACAGTTTTTTAATGAAAGATTGGTTGTTCAAGTGTTGGGTATTGGTGTTGAAGTTGGGGCTCAAAGAGTGATACAATTAGGTGAAGAAGATGAATCCCAAATGCAAGTGAAAAGAGATGATGTTTGTAGATCTCTAAAGAAAATTATGGATGAAGGTGAAGAAGGTGAAGAAAGGAGAAATAAGGCAAATTATTTGAAACAAATGGCTGAAAAAGCTATAGAAGAAGGGGGTTCATCCCAAGTTAATTTGAACCGGTTCATTGAAGATATTAGGATAAGCACAAATAAGGGCCATGTAGGCTAA

MASDLHFLVIPLMCPGHLIPMIDMVKLIAQHSVTVTIVITPRNADRYGAVLRRAIDSGLPIKLLQIRFPASDHGLPDGCESVDDLPTFNLSKNFFDALATLQKPLEDALEFNELESKPNCIISDKHLTWTADVAKKFEIPWVIFDGMSCFTQLATHNLCVSKIYETVTDFDSDMFILPGLPDKISMTKSQLPGLFNPGSSVKAKELLSVREKVRAAELEAYGTLINSFEELETRYINEFKMLKQGKVWCIGPFSNLNTNDLDRAQRGTKDSINNECVTWLDSQQNRSVIYASLGSLTRLTPLQFIELALGLEDSQFPFILVVKGGSRTKEIEKWLDESGYESRVKGRGFLIRGWASQVLILSDRAVGAFLTHCGWNSTIEGVCAGVPMITWPQFAEQFFNERLVVQVLGIGVEVGAQRVIQLGEEDESQMQVKRDDVCRSLKKIMDEGEEGEERRNKANYLKQMAEKAIEEGGSSQVNLNRFIEDIRISTNKGHVG

SrUGT73I1

ATGGCTTCCCCCAAAGACCTTCACTTTGTCTTGTTTCCCTTAATGCAACAAGGTCACATGATACCCATGATCGATATCGCCAGAATACTAGCCCACCGTAACGCCACCGTCACAATCATCACAACTCCGGTCAACGCCACCCGGTTCCGTCCAGCCATCGCTCGTGCAACCGAATCCAAACTCAACATCCAAGTTATTGAACTCGAACTCCGGCTAGCCGATGTCGGGTTACCCGAAGGCTGCGAAAATTTCGACATGCTTCCATCTGCTGATCTCTTTGGCAAAATGTACGCAGCGATGGACTTGTTGGAACACCCGTCGGAAAATGTTCTCCGGCGACTAACTCCGGCACCAAGCTGCATCATCTCCGATAACCAGTTTCCGTGGACAACTGATCTGGCTCGCCGGTTCGGTATCCCGAGGATTGTTTTTCATGGACCTGGATGCTTCACTTACTTGTGTTTAGACATAGTGATGAATACCAACATCCTAAATGAAATCGGGTCTGATTCGGATTACTTTATCCTCCCGGGAATCCCTGACCGGATTGAGATCACAAAAGCGCAAGCCAGCGGTTGGGGAAAACGAGAGACGAAACAGATGGAGAAGTTTTTTGAACGAATGGAGGTCGCGGCAGATACCGCGTATGGGATTGTGGTAAATAGTTTTGACGAGTTGGAGTCGAACTATGTTAAACGACTCGAAGAAGCGAAAGGTAAAAAAATATGGTGCATTGGGCCGGTTTCATTGCACAATCGCGGTTTTCTTGATCTAGCAGAGAGAGGAAACAAGGCGGGAATCGACGAGCATGATTGCGTAAAATGGTTAGACACGAAAGATGCACGGTCTGTGATCTTTGTTTGTTTAGGAAGTATGTCGAGTATGTGTCACGAGCAAATACTCGAGCTCGGATTGGGATTGGAGTTATCCAACGTACAGTTTATTTGGTGTATAAGATCGATTACAGACGAGACGGGGAGATGGTTGTTGGGATATGAACAACGGGTGAAAGATAGAGGGTTAATTGTTCGTGGTTGGGCCCCACAGGTCTTGATACTATCCCATCAATCAGTTGGTGGGTTCATGACTCATTGTGGTTGGAACTCGACTCTTGAAGGGGTTTCAGCCGGGGTCCCGATGGTAACATATCCGCAATTTGCGGATCAGTTTTTGAATGAAAGATTTTTGGTAGATGTGTTGAAAACAGGAGTGAGTATTGGTATGAAGGTGGTTGTTGGTGTTGGGGAGCAAGATAAGCATGGAGTGTTGGTGAAGAAAGAAAACATTAAGATGGCTGTTGAAAGTGTAATGGACGATAACGAGGAAGGAAAAGCGAGGAGAGATCGAGCTAGAGAGCTCGGGGAAATGGCAAAGAGAGCAATGACCGAAGGGGGTTCTTCGTATGTCAACACGACGTTGATGATTCAAGATGTTATTGATGAATTAGCCAAGAACACAAAGCCGATTTAA

MASPKDLHFVLFPLMQQGHMIPMIDIARILAHRNATVTIITTPVNATRFRPAIARATESKLNIQVIELELRLADVGLPEGCENFDMLPSADLFGKMYAAMDLLEHPSENVLRRLTPAPSCIISDNQFPWTTDLARRFGIPRIVFHGPGCFTYLCLDIVMNTNILNEIGSDSDYFILPGIPDRIEITKAQASGWGKRETKQMEKFFERMEVAADTAYGIVVNSFDELESNYVKRLEEAKGKKIWCIGPVSLHNRGFLDLAERGNKAGIDEHDCVKWLDTKDARSVIFVCLGSMSSMCHEQILELGLGLELSNVQFIWCIRSITDETGRWLLGYEQRVKDRGLIVRGWAPQVLILSHQSVGGFMTHCGWNSTLEGVSAGVPMVTYPQFADQFLNERFLVDVLKTGVSIGMKVVVGVGEQDKHGVLVKKENIKMAVESVMDDNEEGKARRDRARELGEMAKRAMTEGGSSYVNTTLMIQDVIDELAKNTKPI

SrUGT74G1-1

ATGGCGGAACAACAAAAGATCAAGAAATCACCACACGTTCTACTCATCCCATTCCCTTTACAAGGCCATATAAACCCTTTCATCCAGTTTGGCAAACGATTAATCTCCAAAGGTGTCAAAACAACACTTGTTACCACCATCCACACCTTAAACTCAACCCTAAACCACAGTAACACCACCACCACCTCCATCGAAATCCAAGCAATTTCCGATGGTTGTGATGAAGGCGGTTTTATGAGTGCAGGAGAATCATATTTGGAAACATTCAAACAAGTTGGGTCTAAATCACTAGCTGACTTAATCAAGAAGCTTCAAAGTGAAGGAACCACAATTGATGCAATCATTTATGATTCTATGACTGAATGGGTTTTAGATGTTGCAATTGAGTTTGGAATCGATGGTGGTTCGTTTTTCACTCAAGCTTGTGTTGTAAACAGCTTATATTATCATGTTCATAAGGGTTTGATTTCTTTGCCATTGGGTGAAACTGTTTCGGTTCCTGGATTTCCAGTGCTTCAACGGTGGGAGACACCGTTAATTTTGCAGAATCATGAGCAAATACAGAGCCCTTGGTCTCAGATGTTGTTTGGTCAGTTTGCTAATATTGATCAAGCACGTTGGGTCTTCACAAATAGTTTTTACAAGCTCGAGGAAGAGGTAATAGAGTGGACGAGAAAGATATGGAACTTGAAGGTAATCGGGCCAACACTTCCATCCATGTACCTTGACAAACGACTTGATGATGATAAAGATAACGGATTTAATCTCTACAAAGCAAACCATCATGAGTGCATGAACTGGTTAGACGATAAGCCAAAGGAATCAGTTGTTTACGTAGCATTTGGTAGCCTGGTGAAACATGGACCCGAACAAGTGGAAGAAATCACACGGGCTTTAATAGATAGTGATGTCAACTTCTTGTGGGTTATCAAACATAAAGAAGAGGGAAAGCTCCCAGAAAATCTTTCGGAAGTAATAAAAACCGGAAAGGGTTTGATTGTAGCATGGTGCAAACAATTGGATGTGTTAGCACACGAATCAGTAGGATGCTTTGTTACACATTGTGGGTTCAACTCAACTCTTGAAGCAATAAGTCTTGGAGTCCCCGTTGTTGCAATGCCTCAATTTTCGGATCAAACTACAAATGCCAAGCTTCTAGATGAAATTTTGGGTGTTGGAGTTAGAGTTAAGGCTGATGAGAATGGGATAGTGAGAAGAGGAAATCTTGCGTCATGTATTAAGATGATTATGGAGGAGGAAAGAGGAGTAATAATCCGAAAGAATGCGGTAAAATGGAAGGATTTGGCTAAAGTAGCCGTTCATGAAGGTGGTAGCTCAGACAATGATATTGTCGAATTTGTAAGTGAGCTAATTAAGGCTTAA

MAEQQKIKKSPHVLLIPFPLQGHINPFIQFGKRLISKGVKTTLVTTIHTLNSTLNHSNTTTTSIEIQAISDGCDEGGFMSAGESYLETFKQVGSKSLADLIKKLQSEGTTIDAIIYDSMTEWVLDVAIEFGIDGGSFFTQACVVNSLYYHVHKGLISLPLGETVSVPGFPVLQRWETPLILQNHEQIQSPWSQMLFGQFANIDQARWVFTNSFYKLEEEVIEWTRKIWNLKVIGPTLPSMYLDKRLDDDKDNGFNLYKANHHECMNWLDDKPKESVVYVAFGSLVKHGPEQVEEITRALIDSDVNFLWVIKHKEEGKLPENLSEVIKTGKGLIVAWCKQLDVLAHESVGCFVTHCGFNSTLEAISLGVPVVAMPQFSDQTTNAKLLDEILGVGVRVKADENGIVRRGNLASCIKMIMEEERGVIIRKNAVKWKDLAKVAVHEGGSSDNDIVEFVSELIKA

SrUGT74G1-2

ATGGCGGAACAACAAAAGATCAAGAAATCACCACACGTTCTACTCATCCCATTCCCTTTACAAGGCCATATAAACCCTTTCATCCAGTTTGGCAAACGATTAATCTCCAAAGGTGTCAAAACAACACTTGTTACCACCATCCACACCTTAAACTCAACCCTAAACCACAGCAACACCACCACCACCTCCATCGAAATCCAAGCAATTTCCGATGGTTGTGATGAAGGCGGTTTTATGAGTGCAGGAGAATCATATTTGGAAACATTCAAACAAGTTGGGTCTAAATCACTAGCTGACTTAATCAAGAAGCTTCAAAGTGAAGGAACCACAATTGATGCAATCATTTATGATTCTATGACTGAATGGGTTTTAGATGTTGCAATTGAGTTTGGAATCGATGGTGGTTCGTTTTTCACTCAAGCTTGTGTTGTAAACAGCTTATATTATCATGTTCATAAGGGTTTGATTTCTTTGCCATTGGGTGAAACTGTTTCGGTTCCTGGATTTCCAGAGCTTCAACGGTGGGAGACACCGTTAATTTTGCAGAATCATGAGCAAATACAGAGCCCTTGGTCTCAGATGTTGTTTGGTCAGTTTGCTAATATTGATCAAGCACGTTGGGTCTTCACAAATAGTTTTTACAAGCTCGAGGAAGAGGTAATAGAGTGGACGAGAAAGATATGGAACTTGAAGGTAATCGGGCCAACACTTCCATCCATGTACCTTGACAAACGACTTGATGATGATAAAGATAACGGATTTAATCTCTACAAAGCAAACCATCATGAGTGTATGAACTGGTTAGACGATAAGCCAAAGGAATCAGTTGTTTACGTAGCATTTGGTAGCCTGGTGAAACATGGACCCGAACAAGTGGAAGAAATCACACGGGCTTTAATAGATAGTGATGTCAACTTCTTGTGGGTTATCAAACATAAAGAAGAGGGAAAGCTCCCAGAAAATCTTTCGGAAGTAATAAAAACCGGAAAGGGTTTGATTGTAGCATGGTGCAAACAATTGGATGTGTTAGCACACGAATCAGTAGGATGCTTTGTTACACATTGTGGGTTCAACTCAACTCTTGAAGCAATAAGTCTTGGAGTCCCCGTTGTTGCAATGCCTCAATTTTCGGATCAAACTACAAATGCCAAGCTTCTAGATGAAATTTTGGGTGTTGGAGTTAGAGTTAAGGCTGATGAGAATGGGATAGTGAGAAGAGGAAATCTTGCGTCATGTATTAAGATGATTATGGAGGAGGAAAGAGGAGTAATAATCCGAAAGAATGCGGTAAAATGGAAGGATTTGGCTAAAGTAGCCGTTCATGAAGGTGGTAGCTCAGACAATGATATTGTCGAATTTGTAAGTGAGCTAATTAAGGCTTAA

MAEQQKIKKSPHVLLIPFPLQGHINPFIQFGKRLISKGVKTTLVTTIHTLNSTLNHSNTTTTSIEIQAISDGCDEGGFMSAGESYLETFKQVGSKSLADLIKKLQSEGTTIDAIIYDSMTEWVLDVAIEFGIDGGSFFTQACVVNSLYYHVHKGLISLPLGETVSVPGFPELQRWETPLILQNHEQIQSPWSQMLFGQFANIDQARWVFTNSFYKLEEEVIEWTRKIWNLKVIGPTLPSMYLDKRLDDDKDNGFNLYKANHHECMNWLDDKPKESVVYVAFGSLVKHGPEQVEEITRALIDSDVNFLWVIKHKEEGKLPENLSEVIKTGKGLIVAWCKQLDVLAHESVGCFVTHCGFNSTLEAISLGVPVVAMPQFSDQTTNAKLLDEILGVGVRVKADENGIVRRGNLASCIKMIMEEERGVIIRKNAVKWKDLAKVAVHEGGSSDNDIVEFVSELIKA

SrUGT74G2

ATGGCGGAACAAAAGAAGATGAACAGATCACCACATGTTCTACTCGTCCCATTCCCTTCACTAGGCCATATAAACCCTTTCATCCAATTTGGCAAACGCTTGATCTCCAAAGATGTCAAAACAACACTCGTTACCACCATTTACATCAGAAACTCTAGCCTCCAAACCAACAACAACAGCTCCATTAAAACCGAAGCAATTTCCGATGGTTTCGATGAAGGCGGTTACCCGAGTCACGATGTTCAAATCCATGAATCCTACCTCAAAACCTTCAAACAAGTTGGGTCCAAATCACTAGCTGATTTGATCAACAAGTTTCAAAGTGAGGGAACCACCATTAGTGCAATCATCTATGATTCAGTCATTCCATGGGCTTTGGATGTTGCAATTGAGTTTGGAATTGATGGGGGTTCGTTTTTCACTCAAGCTTGTGTTGTAAACAGCATATATTATCATGTTCATAAGGGTTTGATTTCTTTGCCATTGGGTGCAACTGTTTCGGTTCCTGGATTTCCAGAGCTTCAACGGTGGGAGACACCGTCTGCTGTACAGAATCATGAGCAATTACACAGCCCTTGGTCTCAGATTCTTTTCGGTCATCAGTTTGCTAATATTCATCAAGTACGTTGGGTTTTCGCAAATACTTTTTACCAACTCGAGGAACAGGTAATAGAGTGGACGAGAAAGATGTGGAACTTGAAGGTGATCGGGCCAACGGTTCCATCTATGTACCTTGACAAACGCCTAAATGATGATAAGGATTATGGGTTAAATCTCTTTAATGCGAACCATAATGAATGCATGAACTGGCTAGACGATAAGCCAAAGGAATCTGTTGTTTACGTATCATTTGGTAGCATGGCGAAACATGGACCCGAACAAGCGGAAGAAATCACATTGGCTTTGATAGATAGTGATGTCAACTTCTTGTGGGTTCTCAAAGATAAAGTAGAGGCAAAACATCCAAATGATCTTTTGGATGTAATAAAAAGTGGAAAGGGCTTGGTTGTGTCATGGTGCAAACAATTGGATGTGTTAGCACACGAAGGAGTAGGATGCTTTGTTACACATTGTGGGTTCAACTCAACTCTTGAAGCAATAAGTCTTGGAGTCCCCGTTGTTGCAATGCCTCAATGGTCAGATCAAACTACAAATGCCAAGCTTCTAGATGAAATTTTGGGTGTTGGAGTTAGAGTTAAAGCTGATGAGAAAGGGATAGTAAGAAGAGAAAATCTAGTATCATGTATTAAGACAATTATGGAGGACAAGAAAGAAACGCGAAAGAACACGGTAAAATGGAGGGATTTGGCAAAAGGAGCCGTTGACAAAGGTGGTAGCTCGGACAAGGATATTGATGAGTTTGTATCTGAGCTAATCAAGGCATAA

MAEQKKMNRSPHVLLVPFPSLGHINPFIQFGKRLISKDVKTTLVTTIYIRNSSLQTNNNSSIKTEAISDGFDEGGYPSHDVQIHESYLKTFKQVGSKSLADLINKFQSEGTTISAIIYDSVIPWALDVAIEFGIDGGSFFTQACVVNSIYYHVHKGLISLPLGATVSVPGFPELQRWETPSAVQNHEQLHSPWSQILFGHQFANIHQVRWVFANTFYQLEEQVIEWTRKMWNLKVIGPTVPSMYLDKRLNDDKDYGLNLFNANHNECMNWLDDKPKESVVYVSFGSMAKHGPEQAEEITLALIDSDVNFLWVLKDKVEAKHPNDLLDVIKSGKGLVVSWCKQLDVLAHEGVGCFVTHCGFNSTLEAISLGVPVVAMPQWSDQTTNAKLLDEILGVGVRVKADEKGIVRRENLVSCIKTIMEDKKETRKNTVKWRDLAKGAVDKGGSSDKDIDEFVSELIKA

SrUGT74G3

ATGGCGGAACAACACAAGATCAACAAATCACCGCATGTTCTACTCTTCCCCTACCCCGCACAAGGCCATATAAACCCTCTCATCCAATTTGGCAAACGTTTGATCTCCAAAGGTGTCAAAACAACACTCGTTACTACCGTCTTCCTCTTAAACTCTAACCTAACCAACACAGAAAACACCACCTCCATTAAAATCGAAGCTATTTCAGATGGTTTCGATGAAGGTGGATACAATAGTGCAGATAGCTCTGAAATCTACCTCGAAACGTTCAAAGAAGTTGGATCCAAATCACTAGCAGATCTAATCAAGAAACTTCAAAGTGAGGGGAACACTATTGATGCAATTATCTATGATTCCTTCATTCCATGGGCTTTGGATGTTGCAATCGAGTTGGGTATTAATGGTGGTTCTTTTTTCACTCAAGCTTGTGGTGTAAACATCATATATTATCATGTTCATAAGGGTTTGATCTCTTTGCCATGTGGTTCAACTGTTTCGGTTCCAGGGTTGCCGGAACTTAAACACTGGGAGACACCGTCTTTTGTACATAATTACGGACCATATCCTGGTTGGTCTAAGACTGTGTTTAGTCAGTTTGATAATATTGATCAAGCACGTTGGGTCTTCACAAATAGTTTTTACGAACTTGAGGCACAGGTGATAGAGTGGATGAGAAAGAAGTGGAACTTGAAGGTGATTGGGCCAACACTTCCATCTATGTACCTTGACAAACGCCTTGAAGATGATAAAGATTACGGGTTCAATCTCTATAAAGCAAACCATAACGAATGCATGAATTGGTTAAACAATAAGCCAAAGGAATCCGTTGTTTACGTTTCGTTTGGAAGCAGTGCAAAACTTGAACCCGAACATATGGAAGAAATGGCATGGGGTTTGATTGATAGCAATATGAACTTCTTATGGGTTGTTAGGGCCGAAGAAGAAGAAAAACTCCCAAAAGAATTTGTGCACCAAAAATTATCTGGAAAAGGTATGGTTGTAGCATGGTGTAGACAATTGGATGTGTTAGCACACGAATCAGTAGGTTGCTTTGTTACGCATTGTGGGTTTAACTCAACTCTTGAAGCGATAAGTCTTGGAGTCCCGGTTGTAGCAATGCCGCAATGGACAGATCAAATTACAAATGCCAAGTTTATAGATGAAATTTGGGGTGTTGGAGTTAGAGTTAAGGCTGATGAGAATGGGATCGTGAGACGTGAAAATCTAGCATCGTGTATTAAGACGATTATGGAGGATGAAAGAGGTGTAATAGTCCAAAAGAAAACGATAAAATGGAGGGATTTGGCTAAATTAGCCGTTGATAAGGGTGGTAGCTCGGAAAAGGATATTGATGAATTTCTATCTGAGCTACTCAGGGAATAA

MAEQHKINKSPHVLLFPYPAQGHINPLIQFGKRLISKGVKTTLVTTVFLLNSNLTNTENTTSIKIEAISDGFDEGGYNSADSSEIYLETFKEVGSKSLADLIKKLQSEGNTIDAIIYDSFIPWALDVAIELGINGGSFFTQACGVNIIYYHVHKGLISLPCGSTVSVPGLPELKHWETPSFVHNYGPYPGWSKTVFSQFDNIDQARWVFTNSFYELEAQVIEWMRKKWNLKVIGPTLPSMYLDKRLEDDKDYGFNLYKANHNECMNWLNNKPKESVVYVSFGSSAKLEPEHMEEMAWGLIDSNMNFLWVVRAEEEEKLPKEFVHQKLSGKGMVVAWCRQLDVLAHESVGCFVTHCGFNSTLEAISLGVPVVAMPQWTDQITNAKFIDEIWGVGVRVKADENGIVRRENLASCIKTIMEDERGVIVQKKTIKWRDLAKLAVDKGGSSEKDIDEFLSELLRE

SrUGT74G4

ATGGCGGAACTGAAGAAATCACCACACGTTCTGCTCTTCCCCTTCCCTATACAAGGACATATAAATCCTCTCTTCCAGTTCGGGAAACGCTTACTATCAAAAGGCATCAAAACAACACTCGTTCCTACCATCTACATCAAATCCACCCTCATCCGTAACAACACCACCATTTCCGCTGGAATCGAACCCATTTCTGATGGTTTTGATGAAGGAGGTTTCGTTAGTGCAGATACCACCGAATCCTACCTTGAAACCTTCAAACAAGTTGGGTCCAAATCACTATCTGACTTGATCAAGAAGCTTCAAAGTCAGGGAACCACCATTGATGCAATCATCTACGATTCCTTCATCACATGGGCTTTGGATGTCGCCATGGAGTTTGGAATCAACGGTGCTTCGTTTTTCACTCAAGCTTGTGCGGTAAACAGCATATATTATCATGTTCATAAGGGTTTGATTTCTTTGCCACCGGGTCCAACTGTTTCGGTTCCCGGGTTGCCCCAGATTGAATGGTGGGAGACACCGTCTTTTGTGCACAATTATGGAACATACCCTGGTTTGTGTGATATGGTGTTCAATCAGTTCGCTAACATTCGTCAAGCACGTTGGGTCTTCACAAATACATTCTACCAACTCGAGCAAGAGGTAATAGAGTGGATGAGAAAGATGTGGAAGTTAAAAGTAATCGGGCCAACAATCCCATCAATGTACCTTGACAAACAACTTGAGGATGATAAAGATTATGGGTTCAATATCTTCAAACCAAACCTCAAGGAATGCATGAATTGGCTAAATGATAAGCCAAAAAAATCAGTTGTTTACGTATCTTTTGGGAGCTTGGCACAACTTGGACCCGAGCAAATGGAGGAAATTGCATGGGGTTTGAGTGATAGCAATGTGAACTTCTTGTGGGTTGTTAGGACAGAAGAAAAGGAAAAACTCCCAAAAGAATTTGTAGAGAAAAATCTATCTGGAAAGGAGGGTTTGGTTGTTTCATGGTGTAAACAATTGGACGTATTAGCACACGAATCAACCGGATGCTTTGTTACACATTGCGGGTTTAACTCAGTTCTTGAGGCAATAAGTCTGGGAGTGCCGGTGGTGGGAATGCCACAATGGACAGATCAAACTACAAATGCCAAACTTCTTGATGAAATCTGGGGTGTTGGAGTAAGAGTTAAAGCTGATGAGAAAGGGATAGTGAGAAGAGGAGATCTGGTATCATGTATTAAGAAAATCATGGAAGAAGAAGAAGGAGTAGTGATCCGAAAGAATGCGGCAAAATGGATGGATTTGGCTAAATCAGCTTTTGATGAAGGTGGGAGCTCTCGCAAGGATATTGATGAATTTGTGGGTGAACTAAAGCATGAATGTTGTTTACCAACGCACAAAGGGGATACATAA

MAELKKSPHVLLFPFPIQGHINPLFQFGKRLLSKGIKTTLVPTIYIKSTLIRNNTTISAGIEPISDGFDEGGFVSADTTESYLETFKQVGSKSLSDLIKKLQSQGTTIDAIIYDSFITWALDVAMEFGINGASFFTQACAVNSIYYHVHKGLISLPPGPTVSVPGLPQIEWWETPSFVHNYGTYPGLCDMVFNQFANIRQARWVFTNTFYQLEQEVIEWMRKMWKLKVIGPTIPSMYLDKQLEDDKDYGFNIFKPNLKECMNWLNDKPKKSVVYVSFGSLAQLGPEQMEEIAWGLSDSNVNFLWVVRTEEKEKLPKEFVEKNLSGKEGLVVSWCKQLDVLAHESTGCFVTHCGFNSVLEAISLGVPVVGMPQWTDQTTNAKLLDEIWGVGVRVKADEKGIVRRGDLVSCIKKIMEEEEGVVIRKNAAKWMDLAKSAFDEGGSSRKDIDEFVGELKHECCLPTHKGDT

SrUGT75E1-1

ATGGCTCAATCTGATCAACCTCAACCACACTTCCTCGTAGTAACCTTTCCAGCCCAAGGTCACATTAACCCGGCTCTACAGTTCGCAAAACAACTCGCCCGGTTCGATGTTAAACTCACCTTCACCACCACCGTCTCCGCCTACCGTGGCATGACCAAATTTGACCAGATTTACAATAATTTCAACTTTGTTGTTTATTCAGACGGCTTCGATGACGGTTTCACTTCTAAATCCGTTGACCCTGATCTCTTCATGACTCAGTTTAGGACCCGGGGAATCCAATCCTTGAAAGAAACCATAACTTCTAGTGCTGAAAATGGCACACCGGTCACATGTTTGGTGTACACCTTCCTCCTACCTTGGGCTGCAGAACTGGCGCGTGAACTTAACGTGCTACCAGCCCTTCTTTGGATCCAACCAGCATCGGTGTTTCGTGTGTACTATTATTATTTCAATGGGTATGATAAACTCATTGGTGAAGATTGTACCGAGTCTTCATGGTCCATCGAGTTACCGGGGCTACCATCGCTCAAAAGTTGTGATTTACCCTCGTTTTGTCTCCCTTCGAGCCCTTATGATACGGTGTTATCTTTGTTTAAGGAACTGCTTCATACGTTGAGTTCGTTTGAAAAGCCGAAGATACTTGCGAATACGTTTGATGCGTTGGAAGAAGAGGCCTTGAAAGAGATTGATGGCAAGATAAACATGGTTGGTGTTGGACCGTTGATTCCATCGGCTTTCTTGGATGGAAACGAGCAATCGGATAGATCTTTTGGAGGAGATATGTTTGACAAATCACATGATTGTTTGGAATGGATGAACACAAATCATGAAGGATCCATTGTTTACGTATCTTTTGGTAGTCTTATAGAATTGTCAAAGAAAGAAAAGGAGTCAATAGCTTGTGGTTTGTTGGAGAGCAAAAGGCCTTTTTTGTGGGTGATGAGAGATAAAGATGGAGAAGCAAAAGAAAAGGAAGATGAAATAAGTTGCATAGAGGAATTGAAACAATTAGGTTTGATAGTTCCTTGGTGCAGCCAACTAGAGGTGTTGTCACACCCGTCTTTAGGTTGTTTTGTGACACATTGTGGTTGGAATTCGACACTCGAGAGTATCGCGTGTGGGGTTCCGGTGGTGGCGTTTCCTAGATGGTCCGATCAAACAACAAATGCAAAGCTTATTGAAGATGTGTGGGGAATTGGGACGAGGGTGACCGCGAATGATCAAGACGGAGTTGTTGAAGCGGAGGAGATAAGAAGGTGTATAGAAATGGTGATGGGAGGTCATGAAAGAGGAGAAACAATGAGAATGAATGCTAAGAAGTGGAAGGATTTGGCTAGAGAGGCTATGAAAGAAAGTGGATCTTCGTATATCAATCTCAAGGATTTTGTTACACAAATTGGAAGTTCTACTTAA

MAQSDQPQPHFLVVTFPAQGHINPALQFAKQLARFDVKLTFTTTVSAYRGMTKFDQIYNNFNFVVYSDGFDDGFTSKSVDPDLFMTQFRTRGIQSLKETITSSAENGTPVTCLVYTFLLPWAAELARELNVLPALLWIQPASVFRVYYYYFNGYDKLIGEDCTESSWSIELPGLPSLKSCDLPSFCLPSSPYDTVLSLFKELLHTLSSFEKPKILANTFDALEEEALKEIDGKINMVGVGPLIPSAFLDGNEQSDRSFGGDMFDKSHDCLEWMNTNHEGSIVYVSFGSLIELSKKEKESIACGLLESKRPFLWVMRDKDGEAKEKEDEISCIEELKQLGLIVPWCSQLEVLSHPSLGCFVTHCGWNSTLESIACGVPVVAFPRWSDQTTNAKLIEDVWGIGTRVTANDQDGVVEAEEIRRCIEMVMGGHERGETMRMNAKKWKDLAREAMKESGSSYINLKDFVTQIGSST

SrUGT75F1

ATGTCAAGCAATCGGAAAATCCTGATAGTTGCTTATTCCGGGAAAGGCCACATCAATCCAGCACTCCGGTTCACCAACCGCCTCCTCAAAGCAGGCGTTGATGTCACCTTCTCCACGAGTCTCTCAGTCGTTCAACTCATCGATACAAAAACCGTCCCTCAAGGCCTAAAGTTTGCTCCATTTTCCGACGGTCACGATACCGGAAAACATCCAAACACACCCCTTCAACAATTTATCTCTGATTTCGAAACAAACGGTGCCCGTGCTGTCACAGAAATAATAGTTTCTGCGACAGACGCAGGTCAACCATTTGACTGTGTGATCTACACCACTGTAATACCGTGGGCAGCACGCGTAGCGCATGCCCACGGCGTTACACCAGTTCTCCTGTGGTGTCAGTCTGCCACCATCTTGGATATTTACTACTACTATCGTAACGATAACGAATATCGAACTTTGATATCCACCAACAACAACAACCCGACGTTTCCGATCAATTTGCCAGGACTGCCGCCACTAACCATAGCCGATTTGCCTTCGTTTTTATTATCTTCATGTCCTAAAGAACACAAGTTTCTTGTTCCGATTTTAGAAGATCATATCGATGTACTGAAAATTACTCCAAGAATACTTGTAAACTCTGTTGATGAACTTGAATTCGAATCCATACGAGCAATCGAGAACCTTAAGTTCATTCCAATTGGGCCTTTGATCCCCTCAGATTCCTATGATCCAAAAGACTCATCGAACTATTCTTTGGGAGTCGATTTCTTCGACAAAACTGATAATGATGAATATGATTACATCCAGTGGTTAAACACACAACCAAAATCATCAGTCGTGTATGTTTCATTCGGAACAATAGCTACATTCAAGATGGAGCAACTGGAGGAGATGGCGATTGGATTAATCGCGATTGGTAGACCGTTTTTATGGGTGATTAGAGATAGTGAGCAAGCAGAAAGAATGAGCGAAATCGATGGATTGCAGAAACAGGGGTTGATAGTGAAATGGTGTTCTCAAACGGAGGTATTCAGTCATCAGTCAGTCGGTTGCGTTGTGATGCACTGCGGGTGGAATTCTACGGTGGAGGTGCTGGCGGCCGGAATTCCCACGGTGGCGTTTGCGCAGTGGTCGGATCAGCCGGCGGACGCGAAGATGATTGAAGATGTGTGGAAGATAGGAATTAGGGTTAAAACAAGGGAAGCAGATGGTATGGTGGAAGGTGTGGAGATTAAGAGGTGTGTGGAAATGGTGATGGAGGATGAACTGATGAAGATTAATGCTGTGAAATGGAAGGAGGTGACCAGAAAAGCTCTCATCAATGGCGGATCTTCCGCCATTAATCTTCAAACTTTCTTGAATGACCTTGGAAACTAA

MSSNRKILIVAYSGKGHINPALRFTNRLLKAGVDVTFSTSLSVVQLIDTKTVPQGLKFAPFSDGHDTGKHPNTPLQQFISDFETNGARAVTEIIVSATDAGQPFDCVIYTTVIPWAARVAHAHGVTPVLLWCQSATILDIYYYYRNDNEYRTLISTNNNNPTFPINLPGLPPLTIADLPSFLLSSCPKEHKFLVPILEDHIDVLKITPRILVNSVDELEFESIRAIENLKFIPIGPLIPSDSYDPKDSSNYSLGVDFFDKTDNDEYDYIQWLNTQPKSSVVYVSFGTIATFKMEQLEEMAIGLIAIGRPFLWVIRDSEQAERMSEIDGLQKQGLIVKWCSQTEVFSHQSVGCVVMHCGWNSTVEVLAAGIPTVAFAQWSDQPADAKMIEDVWKIGIRVKTREADGMVEGVEIKRCVEMVMEDELMKINAVKWKEVTRKALINGGSSAINLQTFLNDLGN

SrUGT75F2

ATGACAACTCACCGGAAAAACAAAATCCTGATCGTCTCCTATCCTAACCAAGGCCACATTAACCCATCTCTCCGTTTCGCCAACCGACTTGCTAAATTCGGTGTCGATGTCACCTTCTCCACCAGCGTCTCCGTCATACGACGCATTGACATAGAAACCACCCACCACGGCCTCATCTTTGCCCCATTTTCCGATGGTCACGACGATGGTCAACAACCATCGACCACCTTGCAACAATTCTTCTCAGATTTTGCCACTAATGGTGCTTGTGCAATCGAGAAAATCATTACCACCGCTACGGCAGCAAGACAACCATTTGACCACTTGGTTTACACCCTTATATTACCATGGGCCGCAAAGGTGGCTAAAGCTCACAATCTCGAGTCAACTCTCCTATGGTGCCAGTCAGCTACTATCTTCGATATTTATTATTACTACTTTAACGGTTACAAAGATTTAATATCGTGTAACAACAACCACCACCCAGCGGTTCCGATCAACTTATCTGGACTTCCGTCATTAACCACCGCCGATTTGCCGTCTTTTCTTTTGTCATCTAGCCCAAAAGAACACGATTTTATTCTAGAGTTTATAAAAGACCATATTGATGTGCTCAAAACTACTCCAAGAATACTTGTTAACACTTTTGATGAACTTGAAATGGAACCCGTTAGAGCGGTTGAGAAACTGGTGATGCTTCCGGTGGGACCGTTAGTCCCACCAGAACTGTTAGACGGAAGTGGTAGTACGTCATATAATTCACGCGGATATGACTTGTTTGAAAAACCAGAGGAAGATTATATGAAATGGTTGAACACAAGGCCGAAATCGTCGGTTGTGTATGCTTCATTTGGAAGCATGGCGACTTTGTCGATGGATCAAGCGGAGGAGATGGGATCCGTGTTGGTTGAAAGTGATCGACCGTTTTTATGGGTGATTAGAGACGGTGATCAAGCGGTGAAACTGAGTAATATAGAGATGCTTAAAAAGCAAGGTATGATAGTGAGTTGGTGTTCTCAAGTGGAGGTGTTGAACCACCAATCAATTGGGTGTTTCTTGACGCATTGTGGGTGGAATTCGACGATGGAAGCATTGGCGGCCGGTGTTCCGACTGTTGTGTTTCCACAGTGGTCGGATCAGATGACCAACGGGAAGATGATTGAAGATGTGTGGAAAACAGGTGTTAGAGTGAAAAGGAGGGAGGAAGATGGAGTGGTGGAAGCGAAGGAGATTAAGAGGTGTTTGGAGATGGTGATGGAAGATGGAGAGATGAGGAGAAATGCTGAGAAATGGAGGGAGTTAGCAAGACAAGCTCATAACAATGGCGGATCATCCACCATGAACATCCAAGCTTTCTTGGATGATGATTGA

MTTHRKNKILIVSYPNQGHINPSLRFANRLAKFGVDVTFSTSVSVIRRIDIETTHHGLIFAPFSDGHDDGQQPSTTLQQFFSDFATNGACAIEKIITTATAARQPFDHLVYTLILPWAAKVAKAHNLESTLLWCQSATIFDIYYYYFNGYKDLISCNNNHHPAVPINLSGLPSLTTADLPSFLLSSSPKEHDFILEFIKDHIDVLKTTPRILVNTFDELEMEPVRAVEKLVMLPVGPLVPPELLDGSGSTSYNSRGYDLFEKPEEDYMKWLNTRPKSSVVYASFGSMATLSMDQAEEMGSVLVESDRPFLWVIRDGDQAVKLSNIEMLKKQGMIVSWCSQVEVLNHQSIGCFLTHCGWNSTMEALAAGVPTVVFPQWSDQMTNGKMIEDVWKTGVRVKRREEDGVVEAKEIKRCLEMVMEDGEMRRNAEKWRELARQAHNNGGSSTMNIQAFLDDD

SrUGT76G1-1

ATGGAAAATAAAACGGAGACCACCGTTCGCCGGCGCCGGAGAATAATATTATTCCCGGTACCATTTCAAGGCCACATTAACCCAATTCTTCAGCTAGCCAATGTGTTGTACTCTAAAGGATTCAGTATCACCATCTTTCACACCAACTTCAACAAACCCAAAACATCTAATTACCCTCACTTCACTTTCAGATTCATCCTCGACAACGACCCACAAGACGAACGCATTTCCAATCTACCGACTCATGGTCCGCTCGCTGGTATGCGGATTCCGATTATCAACGAACACGGAGCTGACGAATTACGACGCGAACTGGAACTGTTGATGTTAGCTTCTGAAGAAGATGAAGAGGTATCGTGTTTAATCACGGATGCTCTTTGGTACTTCGCGCAATCTGTTGCTGACAGTCTTAACCTCCGACGGCTTGTTTTGATGACAAGCAGCTTGTTTAATTTTCATGCACATGTTTCACTTCCTCAGTTTGATGAGCTTGGTTACCTCGATCCTGATGACAAAACCCGTTTGGAAGAACAAGCGAGTGGGTTTCCTATGCTAAAAGTGAAAGACATCAAGTCTGCGTATTCGAACTGGCAAATACTCAAAGAGATATTAGGGAAGATGATAAAACAAACAAAAGCATCTTCAGGAGTCATCTGGAACTCATTTAAGGAACTCGAAGAGTCTGAGCTCGAAACTGTTATCCGTGAGATCCCGGCTCCAAGTTTCTTGATACCACTCCCCAAGCATTTGACAGCCTCTTCCAGCAGCTTACTAGACCACGATCGAACCGTTTTTCAATGGTTAGACCAACAACCGCCAAGTTCGGTACTGTATGTTAGTTTTGGTAGTACTAGTGAAGTGGATGAGAAAGATTTCTTGGAAATAGCTCGTGGGTTGGTTGATAGCAAGCAGTCGTTTTTATGGGTGGTTCGACCTGGGTTTGTCAAGGGTTCGACGTGGGTCGAACCGTTGCCAGATGGGTTCTTGGGTGAAAGAGGACGTATTGTGAAATGGGTTCCACAGCAAGAAGTGCTAGCTCATGGAGCAATAGGCGCATTCTGGACTCATAGCGGATGGAACTCTACGTTGGAAAGCGTTTGTGAAGGTGTTCCTATGATTTTCTCGGATTTTGGGCTCGATCAACCGTTGAATGCTAGATACATGAGTGATGTTTTGAAGGTAGGGGTGTATTTGGAAAATGGGTGGGAAAGAGGAGAGATAGCAAATGCAATAAGAAGAGTTATGGTGGATGAAGAAGGAGAATACATTAGACAGAATGCAAGAGTTTTGAAACAAAAGGCAGATGTTTCTTTGATGAAGGGTGGTTCGTCTTACGAATCATTAGAGTCTCTAGTTTCTTACATTTCATCGTTGTAA

MENKTETTVRRRRRIILFPVPFQGHINPILQLANVLYSKGFSITIFHTNFNKPKTSNYPHFTFRFILDNDPQDERISNLPTHGPLAGMRIPIINEHGADELRRELELLMLASEEDEEVSCLITDALWYFAQSVADSLNLRRLVLMTSSLFNFHAHVSLPQFDELGYLDPDDKTRLEEQASGFPMLKVKDIKSAYSNWQILKEILGKMIKQTKASSGVIWNSFKELEESELETVIREIPAPSFLIPLPKHLTASSSSLLDHDRTVFQWLDQQPPSSVLYVSFGSTSEVDEKDFLEIARGLVDSKQSFLWVVRPGFVKGSTWVEPLPDGFLGERGRIVKWVPQQEVLAHGAIGAFWTHSGWNSTLESVCEGVPMIFSDFGLDQPLNARYMSDVLKVGVYLENGWERGEIANAIRRVMVDEEGEYIRQNARVLKQKADVSLMKGGSSYESLESLVSYISSL

SrUGT76G1-2

ATGGAAAATAAAACGGAGACCACCGTTCGCCGGCGCCGGAGAATAATATTATTCCCGGTACCATTTCAAGGTCACATAAACCCAATGCTTCAGCTAGCCAATGTGTTGTACTCCAAAGGATTCAGTATCACCATCTTTCACACCAACTTCAACAAACCCAAAACATCTAATTACCCTCACTTCACTTTCAGATTCATCCTCGACAACGACCCACAAGACGTACGCATTTCCAATCTACCGACTCATGGTCCGCTCGCTGTTATGCGGATTCTGATTATCAACGAACACGGAGCTGACGAATTACGACGCGAACTGGAACTGTTGATGTTAGCTTCTGAAGAAGATGGAGAGGTATCGTGTTTAATCGCCGATCAGATTTGGTACTTCACGCAATCTGTTGCTGACAGTCTTAACCTCCGACGGCTTGTTTTGGTGACAAGCAGCTTGTTTAATTTTCATGCACATGTTTCACTTCCTCAGTTTGATGAGCTTGGTTACCTCGATCCTGATGACAAAACCCGTTTGGAAGAACAAGCGAGTGGGTTTCCTATGCTGAAAGTGAAAGATATCAAGTGTAGTTTTTCGATGTGGAAAAAATACAAAGAGTATTTCGAGAACATTACGAAACAAACAAAAGCATCTTCAGGAGTCATCTGGAACTCATTTAAGGAACTCGAAGAGTCTGAGCTCGAAACTGTTATCCGTGAGATCCCGGCTCCAAGTTTCTTGATACCACTCCCCAAGCATTTGACAGCCTCTTCCAGCAGCTTACTAGACCACGATCGAACCGTTTTTCCATGGTTAGACCAACAACCGTCACGTTCGGTACTGTATGTTAGTTTTGGTAGTGGTACTGAAGTACTGGATGAGAAAGATTTCTTGGAAATAGCTCGTGGGTTGGTTGATAGCAAGCAGTCGTTTTTATGGGTGGTTCGACCTGGGTTTGTCAAGGGTTCGACGTGGGTCGAACCGTTGCCAGATGGGTTCTTGGGTGAAAGAGGACGTATTGTGAAATGGGTTCCGCAGCAAGAAGTGCTAGCTCATGGAGCAATAGGCGCATTCTGGACTCATAGCGGATGGAACTCTACGTTGGAAAGCGTTTGTGAAGGTGTTCCTATGATTTTCTCGGATTTTGGGCTCGATCAACCGTTGAATGCTAGATACATGAGTGATGTTTTGAAGGTAGGGGTGTATTTGGAAAATGGGTGGGAAAGAGGAGAGATAGCAAATGCAATAAGAAGAGTTATGGTGGATGAAGAAGGAGAATACATTAGACAGAATGCAAGAGTTTTGAAACAAAAGGCAGATGTTTCTTTGATGAAGGGTGGTTCATCTTACGAATCATTAGAGTCTCTAGTTTCTTACATTTCATCGTTGTAA

MENKTETTVRRRRRIILFPVPFQGHINPMLQLANVLYSKGFSITIFHTNFNKPKTSNYPHFTFRFILDNDPQDVRISNLPTHGPLAVMRILIINEHGADELRRELELLMLASEEDGEVSCLIADQIWYFTQSVADSLNLRRLVLVTSSLFNFHAHVSLPQFDELGYLDPDDKTRLEEQASGFPMLKVKDIKCSFSMWKKYKEYFENITKQTKASSGVIWNSFKELEESELETVIREIPAPSFLIPLPKHLTASSSSLLDHDRTVFPWLDQQPSRSVLYVSFGSGTEVLDEKDFLEIARGLVDSKQSFLWVVRPGFVKGSTWVEPLPDGFLGERGRIVKWVPQQEVLAHGAIGAFWTHSGWNSTLESVCEGVPMIFSDFGLDQPLNARYMSDVLKVGVYLENGWERGEIANAIRRVMVDEEGEYIRQNARVLKQKADVSLMKGGSSYESLESLVSYISSL

SrUGT76G2

ATGGAGAACCAACCACAAACAACCGTTCGTCGGCACCGGAGAATAATACTTTTTCCGATGCCATTTCAAGGTCATATAAACCCAATGATTCAGCTAGCCAATCTTCTCTATTCCAATGGATTCAGCATCGTCATCCTTCACACAAACTTCAACGCGCCCAAATTCTCTAATTACCCTAACTTCACTTTCATATCAGTTCTCGATAACGCCGAAAACGAACCGTTTTCCACATCATCGTCGTTCGAATTCGCTCAAAATTATACCTTTAAACAAGACGGTGCAGATGAATTACGTCATAAACTGGAATTATTGTTAGCTTCTGGAAACGATGAGCCGGTATCGTGTTTGATCACTGACGCGATTTGGCACTTCACGCAATCGGTGGCTGATAGTCTTCAGATTCCGAGAATTGTTTTGAGGACAACTAGCGTTTATTGTTCTATTGTTTATGCTTCCATTCCCCTTTTTGATGATCGTGGTTACTTCGCACTTGATGACAGTCATTTGGAAGAACAAGTAATGGAGTTTCCATTACTAAAAGTGAAAGACATAAAAAAGATTGGAATAAAGAGCATGAATGACCCATATGCGAAGATGATACGCGAAATGGTTAAACAAATAAAAGCATCATCGGGAATCATTTGGAACTCTTTCAAAGAACTCGAAGAAACCGAGCTCGATAGCATTCCACATGATTTCCCGATACCACGTTTCATTATACCATTCCACAAGTATTTTAACGCTTCATCGAGTAGTTTACTAGAACAAGATCGAACCATTTTTCCTTGGTTAGACCAACAAGCACCCAAGTCTGTACTCTATGTTAGTTTTGGTAGCCTTTGTCAAGTGGATGAGAAAGAGTTCTTGGAAATAGCTCACGGGTTGGTCTATAGCCAACAACCCTTTTTATGGGTGGTTCGACTAGGGTTCGTTAAAGATTCAACATGGCTCGAGTCATTGCCATTGCCAGATGGGTTCCCAGGTGAAAGGGGGCGAGTTGTTAAATGGGCTCCTCAACAAGAAGTTTTAGCTCATGAAGCAACGGGTGCGTTTTGGACTCATAGCGGATGGAACTCGACTTTGGAGAGTGTTTGTGAAGGTGTTGCAATGATTTGTTCGCCTTTTTGGGGCGATCAACCGATTGACGCGCGATACATGAGCGATGTCTCGAAGGTGGGGGTGTATTTAGAGAATGGGTTTCAAAGAGATGAGATATCAAGTGCCATAAGAAGAGTAATGGTGGATGAAGATGGAAAAGATATTAGAGAGAGG

MENQPQTTVRRHRRIILFPMPFQGHINPMIQLANLLYSNGFSIVILHTNFNAPKFSNYPNFTFISVLDNAENEPFSTSSSFEFAQNYTFKQDGADELRHKLELLLASGNDEPVSCLITDAIWHFTQSVADSLQIPRIVLRTTSVYCSIVYASIPLFDDRGYFALDDSHLEEQVMEFPLLKVKDIKKIGIKSMNDPYAKMIREMVKQIKASSGIIWNSFKELEETELDSIPHDFPIPRFIIPFHKYFNASSSSLLEQDRTIFPWLDQQAPKSVLYVSFGSLCQVDEKEFLEIAHGLVYSQQPFLWVVRLGFVKDSTWLESLPLPDGFPGERGRVVKWAPQQEVLAHEATGAFWTHSGWNSTLESVCEGVAMICSPFWGDQPIDARYMSDVSKVGVYLENGFQRDEISSAIRRVMVDEDGKDIRER

SrUGT76H1

ATGATTCCCACTCTCCAGCTAGCCACAACCCTTCATGCCAAAGGTTTCACCATAGCAATCGCACACTCCAAACTTAACCCACCCAACCCATCTAACCATCCTTCCGATTTCATCTTCCTCCCGCTTTCCGATGACATACCGGCCATTGACAACTCCGGCAGCTTCACTGACTTCACCAGAAAGCTCAACAACAACTGCAAACCATCATTCAAGGAACACTTGACTCGATTGATCAGTGAAGGAAACAAATCGATCGTTGTCGTGTATGATAATGTGTTGCACTTTGCCGGAATTGTTGCCGTTGATCTGAATCTCGCCGCCGTTATGCTCCGCAGTTCTAGTGCGGCGTACTTTCCGGCTTTTCTTGCCCGTCAACAGCTCCGTCAACGAGGCAGGTTTCTTGAAGAAGATTTTAAGATGGATGAGATGGTGCCAAATCATTATCCCATGAGGTACAAAGACCTACCATTTTCTAAATCACCAATTGAAGATTGGAGACAACTTTATTCAAACTTCAGTCAACAAGCACACCCTTCAGCCGTTATCTGGAACACCATCAAATTCCTCGAACACGAGTCGTTGACTCAAGTCCACAACTACTATCAGGTTCCTGTTTTCGCAGTTGGACCTTTGCACAAAATGACACCAACCTCGTATATTGGTTCTCACGAAGAAGACAACGGTTGCATCACATGGCTCGATAAACAACCTCCCAAATCCGTGGTCTACATAAGCTTTGGAAGCTTAGCCACAATGGAGGCAAAAATTCTAACCGAGATGGCATTTGGTCTAGCTAAAAGCAACCAACGGTTCCTATGGGCGGTTAGACCAGGTTTGATTAGTGATTCAGGGTGGGTTGAGTTTTTGCCAGAGGGGTTCGTAGAGGAAACGAGAGGACGAGGGTTAATCGTGAAATGGGCTCCTCAGAAGGAAGTGTTAGCCCATTTTGCGGTGGGTGGGTTTTGGAGTCATTGTGGATGGAATTCGTGTTTGGAGAGTATTTCATCAGGAGTTGTGATGATGTGTCAACCGTTTATTGCAGACCAAGGGGTGAATGCGCGTTATGTGAGTTACGTGTGGAAGATCGGGCTTGAGTTGGAGCGAGTTGAGAGAGGAGAGATTGAAAGGATGATTAAAAGAGTTATGGTGGATGATGAAGGAGAGGAAATGAGAGTTAGAGTGAATGATATGAAGAAAATGGTTAAAGAAGCTTTGGAGATTGGTGGTTCTTCACAAGAATCATTTGAAGGTTTGGTTGAATTCTTGTTGTCATGTTGA

MIPTLQLATTLHAKGFTIAIAHSKLNPPNPSNHPSDFIFLPLSDDIPAIDNSGSFTDFTRKLNNNCKPSFKEHLTRLISEGNKSIVVVYDNVLHFAGIVAVDLNLAAVMLRSSSAAYFPAFLARQQLRQRGRFLEEDFKMDEMVPNHYPMRYKDLPFSKSPIEDWRQLYSNFSQQAHPSAVIWNTIKFLEHESLTQVHNYYQVPVFAVGPLHKMTPTSYIGSHEEDNGCITWLDKQPPKSVVYISFGSLATMEAKILTEMAFGLAKSNQRFLWAVRPGLISDSGWVEFLPEGFVEETRGRGLIVKWAPQKEVLAHFAVGGFWSHCGWNSCLESISSGVVMMCQPFIADQGVNARYVSYVWKIGLELERVERGEIERMIKRVMVDDEGEEMRVRVNDMKKMVKEALEIGGSSQESFEGLVEFLLSC

SrUGT76H3

ATGGCGGAGCACGGCGGCCGGAGACGGCGATTGGTGATGGTAGCAAGTCCACTTCAAGGTCACATGACCCCCATGCTTCAGCTTGCAACTTACCTTCACTCCCAAGGGTTTTCAATAACCGTCGCTCACTCCGATCTAAACCCGCCGGAATCTTCCAACCACCCTGATTTAACCTTCCTCTCACTTTCCGGTAACTTATCCGGCACCGGCAGCTTCACCAGCTTGATCCAGTTATTTCAAACTCTTAACGATATCTGCAAACCCCATCTCATTGAATATCTGGCTCAGATTATAAAATCAGAAGAAGATATTATTGATAAGGAGTTGATCGTAATCATCCATGATAACCTCACGTTTTTCGCCGGAGAAGTTGCCGGCGAGCTGGGTTTGCCGGCGATCGTCTTGCGTGGAAGTAGTGCAGTGTTTTCCCCTGCGTTTAACATCATCCCTCTGCTTCATCAAGATAATCGATTTCCTCCACAAGATTCTTTATTGCAGGAAATAATTCCAGAACTTCATCCATTCAAATACAAAGATCTACCTTTCATTAACCGCCCGATAAATCAAACCCTTCATTTGATCAAAATGATTAACCTCAAGAACCCCCCATCCGCTTTAATTTGGAACACCATCGAGTTTCTTGAACAATCGGCGTTAACCCAGATCCGCGATACCCACCAAGTTCCAGTTTTTACAATCGGTCCGTTGCACAAAATAGTCACAACACGTTCGACTAGCTTTCTTGAAGAGGACACAAGTTGCATCAATTGGTTAGATAAACAATTACCCAAATCAGTGGTTTATGTGAGTTTAGGAAGTTTAGCAAACTTGGATGAAAAGGTTGCATCTGAAATGGCATGCGGTCTAGCCATGAGTAACCATAAGTTCATATGGGTGGTTCGACCCGGTTCGGTCAGTGGGTTTGCATGGATCGAGTTTTTGCCGGATAGTTTGGTGGGTGAAATGAAGGCGAGAGGTTTGATTGTGAAGTGGGCACCTCAGAAGTCGGTTTTGGCGCATAACGCGATTGGTGGATTTTGGAGTCATTGCGGTTGGAACTCGACTATGGAAGGTGTTTCTGAAGGGGTCCCAATGTTGTGTCAACCGTTTGATGTTGATCAGTTGTTGAATGCGAGGTATGTGAGTGACGTTTGGAAGACGGGTTTTGAAATTGTTGTTGAGAGAGGTGAGATTGCGCGTGCGATTAAAAGAGTTTTGGTGGATTACGAAGGCGAAGAAATGAGGCAAAGAGCTATGGAGAATCAAGAAAAGGTTAAACTTGCGATCAGTTATGGTGGTTCTTCGTATAACTCGTTAAAAGACTTGGTGTCCTTCATTTTGTCTTTGTAA

MAEHGGRRRRLVMVASPLQGHMTPMLQLATYLHSQGFSITVAHSDLNPPESSNHPDLTFLSLSGNLSGTGSFTSLIQLFQTLNDICKPHLIEYLAQIIKSEEDIIDKELIVIIHDNLTFFAGEVAGELGLPAIVLRGSSAVFSPAFNIIPLLHQDNRFPPQDSLLQEIIPELHPFKYKDLPFINRPINQTLHLIKMINLKNPPSALIWNTIEFLEQSALTQIRDTHQVPVFTIGPLHKIVTTRSTSFLEEDTSCINWLDKQLPKSVVYVSLGSLANLDEKVASEMACGLAMSNHKFIWVVRPGSVSGFAWIEFLPDSLVGEMKARGLIVKWAPQKSVLAHNAIGGFWSHCGWNSTMEGVSEGVPMLCQPFDVDQLLNARYVSDVWKTGFEIVVERGEIARAIKRVLVDYEGEEMRQRAMENQEKVKLAISYGGSSYNSLKDLVSFILSL

SrUGT76H4

ATGGCGGAGCACGGCGGCCGGAGACAGCGGCTGGTGTTGGTACCATCTCCACTTCAAGGTCACGTGACCCCCATGCTTCAGCTTGCAACTTACCTCCATTCTCAAGGGATTTCAATAACCATCGCTCAGTACCCCAACTTCAACTCGCCGGATTCTTCCAACCATCCAGAACTAACCTTCCTCCCACTATCCTCCGGCAACTTATCCGTCGCCGACATCTCCGGCGGCTTTTTCAAGTTCATCCAAACTCTTAACCATAACTGCAAACCCCATTTCCGGGAATACCTTGTTCAGAACATGAGTTCTGATGATAAGGAATCAATCGTTATCATCCGTGATAATCTCATGTTTTTCGCCGGAGAAATCGCCGGCGAGCTGGGTCTGCCTTCGATCATTTTACGTGGCAGCAATGCTGTCATGTTGACTGCTAGCGACATCATCCCTCAACTTCATCAAGAAGGTCGTTTTCCGCCACCAGATTCTTTGTTGCAGGAAACAATTCCAGAACTGGTTCCATTCAGATACAAAGATCTACCATTTATTGGCTATCCAATACATCAAACCCTTGAATTTAGTATCACCATGATGACCCCCAAATCACCTGCTTCCGCCATTCTTATCAACACCCTCGAATTTCTTGAACAATCGGCATTAACCCAGATCCGTGATCATTACAAAGTTCCAGTTTTTACAATCGGACCATTGCACAAAATAGTCACAACTCGTTCCACTAGCATTCTTGAAGAAGATACAAGTTGCATCAATTGGTTAGATAAACAATCACCCAAATCAGTGGTTTATGTGAGTTTAGGAAGCTTAGCAAAGTTGGATGAAAAGGTTGCATCTGAAATGGCATGTGGTTTAGCCATGAGTAACCATAAGTTCCTATGGGTGGTTCGACCCGGTATGGTTCATGGGTTTGAATGGGTCGAGTTTTTGCCGGATAGTTTGGTGGGTGAAATGAAGGCGAGAGGTTTGATTGTGAAATGGGCACCCCAGACGACGGTTTTGGCGCATAACGCGGTTGGTGGATTTTGGAGTCATTGCGGTTGGAACTCGACCATAGAATGCTTAGCTGAAGGGGTCCCGATGATGTGTCAACCGTTTTTTGCCGATCAGTTGTTGAATGCTAGGTATGTGAGTGATGTTTGGAAGACGGGTTTTGAGATTGTTATCGAGAAAGGTGAGATTGCGTGCGCGATTAAACGAGTTTTGGTGGATGAAGAAGGCGAAGAAATGAGGCAGAGAGCTATGGAGATTAAAGAAAAGGTTAAAATTGCAATCAACGATGGTGGTTCTTCTTATGACTCGTTCAAGGACTTGGTGGCGTTTATTTCATCACTCTAA

MAEHGGRRQRLVLVPSPLQGHVTPMLQLATYLHSQGISITIAQYPNFNSPDSSNHPELTFLPLSSGNLSVADISGGFFKFIQTLNHNCKPHFREYLVQNMSSDDKESIVIIRDNLMFFAGEIAGELGLPSIILRGSNAVMLTASDIIPQLHQEGRFPPPDSLLQETIPELVPFRYKDLPFIGYPIHQTLEFSITMMTPKSPASAILINTLEFLEQSALTQIRDHYKVPVFTIGPLHKIVTTRSTSILEEDTSCINWLDKQSPKSVVYVSLGSLAKLDEKVASEMACGLAMSNHKFLWVVRPGMVHGFEWVEFLPDSLVGEMKARGLIVKWAPQTTVLAHNAVGGFWSHCGWNSTIECLAEGVPMMCQPFFADQLLNARYVSDVWKTGFEIVIEKGEIACAIKRVLVDEEGEEMRQRAMEIKEKVKIAINDGGSSYDSFKDLVAFISSL

SrUGT76I1-1

ATGCTTCAATTAGCAAACATCCTTCACACTCACGGTTTTAAAATTACGATCATACACGCTAAATTCAACTCTCCAAATCCTTCAAAATATCCTCACTATAACTTCAAGTCCATTGACGAAGGTTTTTCGAAGATTGCAGATCAGTTGGGTACTAACAAAGACGCTAGCTATTTTCTTAGGTACCTAAATGAAAGTTGTGTAGATCCGTTTCGGGATTGTTTGGGTGGGTTGTTGGCACAATCCGGTGAAGAGAAGGTTGCTTGTTTAATCACGGATGCGGGTTTCTACTTCACACAGGCGGTGGCGGATAAACTGAAGATACCTAGGATTGTGCTACGGACAAGTAGTCTTGGTTGTGTCCTTGCTTACGATGTTATACCTTTTTACTCTAAAAAGGATT

GCTTTCACCTTACAAAAGAAGATCCAGATTATGAAGCATCGGTGCCGGAGTATCCACTTTTGAAATTTAAAGACATCGCAAAGATCGCACCCAACCCACAAGGCATGGGTGATTTTGTCTCCAACAAGATTACTCAGATGAGAGCATCATCAGGGATCATATGGAACACTTACAAAGAACTCGAAGAATCCGATCTAGAAACTATCACTCAAACGATTCCGGTTCCACACTTCACTTTAGGCCCATTCCACAAGTACTTCCCCGCAACTTCTAGCAGCTTGATCGAACAAGACCGCACCATTCTGTCATGGCTAGACAAACAAGCTCCCAAATCGGTCATATATGTTAGTTTTGGAAGTGTTGCATATATAACAGAGTCAGAGTTTCAAGAAGTGGCTCATGGGCTAGCTAACACTGGTTTACCATTTTTGTGGGTGGTTCGACCAGGGATAGTTGCTGGTTCAAAATGGCTCGAGTCATTGCCCGAAAATTTTCTAGAGAAAATGGGCGATAGGGGACGGATAGTGAAATGGTCTCCTCAACAAGAAGTGCTGGCTCATCCATCAACGGGGTGTTTTTGGACTCATAATGGATGGAATTCAACGTTGGAGAGTATATGTGAAGGAGTTCCCATGATTTGTTCCCCGTGTTTTGTTGACCAACCAATAAATGCGCGATATGTGAGTGATGTTTGGAAGATTGGTGTTTTTTTGGAGGATGGGTTCGAAAGAGTGGGAATCGAGAACGCGATTAAACGAGTGATGATGGATAAAGAAGGAGAAGAAATCCGTGAGAGAATAACTTCTCTTAAGGATAAGGTAAACCCTTCACTTGACAAAGATGGCTCTTCTTGTCACTCACTAAACAAGTTGGTGGAATATATTACATCATTATAA

MLQLANILHTHGFKITIIHAKFNSPNPSKYPHYNFKSIDEGFSKIADQLGTNKDASYFLRYLNESCVDPFRDCLGGLLAQSGEEKVACLITDAGFYFTQAVADKLKIPRIVLRTSSLGCVLAYDVIPFYSKKDCFHLTKEDPDYEASVPEYPLLKFKDIAKIAPNPQGMGDFVSNKITQMRASSGIIWNTYKELEESDLETITQTIPVPHFTLGPFHKYFPATSSSLIEQDRTILSWLDKQAPKSVIYVSFGSVAYITESEFQEVAHGLANTGLPFLWVVRPGIVAGSKWLESLPENFLEKMGDRGRIVKWSPQQEVLAHPSTGCFWTHNGWNSTLESICEGVPMICSPCFVDQPINARYVSDVWKIGVFLEDGFERVGIENAIKRVMMDKEGEEIRERITSLKDKVNPSLDKDGSSCHSLNKLVEYITSL

SrUGT76I1-2

ATGCTTCAATTAGCAAACATCCTTCACACTCACGGTTTTAAAATTACGATCATACACGCTAAATTCAACTCTCCAAATCCTTCAAAATATCCTCACTATAACTTCAAGTCCATTGACGAAGGTTTTTCGAATATTGCAGATCAGTTGGGTTCTAACAAAGACGCTAGCTATTTTCTTAGGTACCTAAATGAAAGTTGTGTAGATCCGTTTAGGGATTGTTTGGGTGGGTTGTTGGCACAATTCGGTGAAGAGAAGGTTGCTTGTTTAATCACGGATGCGGGTTTCTACTTCACACAGGCGGTGGCGGATGAACTGAAGATACCTAGGATTGTGCTACGGACAAGTAGTCTTGGTTGTGTCCTTGCTTACGATGTTATACCTTTTTACTCTAAAAAGGATTGCTTTCACCTTACAAAAGAAGATCCAGATTATGAAGCATCGGTGCCGGAATATCCACTTTTGAAATTTAAAGACATCGCAAAGATCGCACCCAACCCACAAGGCATGGGTGATTTTGTCTCCAACAAGATTACTCAGATGAGAGCATCATCAGGGATCATATGGAACACTTACAAAGAACTCGAAGAATCCGATCTAGAAACTATCACTCAAACGATTCCGGTTCCACACTTCACTTTAGGCCCATTCCACAAGTACTTCCCCGCAACTTCTAGCAGCTTGATCGAACAAGACCGCACCATTCTGTCATGGCTAGACAAACAAGCTCCCAAATCGGTCATATATGTTAGTTTTGGAAGTGTTGCATATATAACTGAGTCAGAGTTTCAAGAAGTGGCTCATGGGCTAGCTAATACTGGTTTACCATTTTTGTGGGTGGTTCGACCAGGGATAGTTGCTGGTTCAGAATGGCTAGAGTCATTGCCCGAAAATTTTCTAGAGAAAATGGGCGATAGGGGACGGATAGTGAAATGGTCTCCTCAACAAGAAGTGCTGGCTCATCCATCAACTGGGTGTTTTTGGACTCATAATGGATGGAATTCAACGTTGGAGAGTATATGTGAAGGAGTTCCCATGATTTGTTCCCCGTGTTTTGTTGACCAACCAATAAATGCGCGATATGTGAGTGATGTTTGGAAGATTGGTGTTTTTTTGGAGGATGGGTTCGAAAGAGTGGGAACCGAGAACACGATTAAACGAGTGATGATGGATAAAGAAGGAGAAGAAATCCGTGAGAGAATAACTTCTCTTAAGGATAAGGTAAACCCTTCACTTGACAAAGGTGGCTCTTCTTGTCACTCACTAAACAAGTTGGTGGAATATATTACATCATTATAA

MLQLANILHTHGFKITIIHAKFNSPNPSKYPHYNFKSIDEGFSNIADQLGSNKDASYFLRYLNESCVDPFRDCLGGLLAQFGEEKVACLITDAGFYFTQAVADELKIPRIVLRTSSLGCVLAYDVIPFYSKKDCFHLTKEDPDYEASVPEYPLLKFKDIAKIAPNPQGMGDFVSNKITQMRASSGIIWNTYKELEESDLETITQTIPVPHFTLGPFHKYFPATSSSLIEQDRTILSWLDKQAPKSVIYVSFGSVAYITESEFQEVAHGLANTGLPFLWVVRPGIVAGSEWLESLPENFLEKMGDRGRIVKWSPQQEVLAHPSTGCFWTHNGWNSTLESICEGVPMICSPCFVDQPINARYVSDVWKIGVFLEDGFERVGTENTIKRVMMDKEGEEIRERITSLKDKVNPSLDKGGSSCHSLNKLVEYITSL

SrUGT76I2

ATGGTAACCAATGGAAACGACACCAGTCTCCGGTCAAGAAACCACCGGAGAATAATATTATTTCCGTTACCTTTTCAGGGTCATATCAACCCCATGCTTCAATTAGCAAACATCCTTCACACACACCATTTTAAAATCACAATCATACACGCTAAATTCAACTCTCTGAATCCGTCAAAATATCCTCACTTCAACTTCAACCCCATTGACGAGGGTTTTTCGGAGATTGCGGACGAGTTGGGTACTAACAAAGACGCTAGCTATTTTCTTAGGTACCTAAATGAAAGTTGTGTAGATCCGTTTAGGGATTGTTTGGGTGGGTTGTTGGCACAACCCGGTGAAGAGAAGGTTGCTTGTTTAATCACGGATGCGGGTTTCTACTTCACACAGGCGGTGGCGGATGAACTGAAGATACCTAGGATTGTGCTACGGACAAGCAGTATTGGTTGTGTCCTTGCTTACGATGCTATACCTTTTTACTCTAAAAAGGATTGCTTTCTCCTTACAAAAGAAGATCCAGATTATGAAGCATCGGTGCCGGAATATCCACTTTTGAAATTTAAAGACATCGCAAAGATCGCACCCAACCCACAAGGCATGGGTGATTTTGTCTCCAACAAGATTACTCTGATGAGAGCATCATCAGGGATCATATGGAACACTTACAAAGAACTCGAAGAATCCGATCTAGAAACTATCACTCAAACGATTCCGGTTCCACACTTCACTTTAGGCCCATTCCACAAGTACTTCCCCGCAACTTCTAGCAGCTTGATCGAACAAGACCGCACCATTCTGTCATGGCTAGATAAACAAGCTCCCAAATCGGTCGTATACGTTAGTTTTGGAAGTGTGGCATATATAACCGAGTCAGAGTTTCAAGAAGTGGCTCATGGGCTAGCTAATACTGGTTTACCATTTTTGTGGGTGGTTCGACCAGGGATAGTTGCTGGTACAAAATGGCTCGAGTCATTACCTGAAAATTTTCTAGAAAAAATGGGCGATAGGGGACGGATAGTGAAATGGTCTCCTCAACAAGAAGTGCTGGCTCATCCTGCAACGGGGTGTTTTTGGACTCATAACGGATGGAATTCAACGTTGGAGAGTATATGTGAAGGAGTTCCCATGATTTGTTCCCCGTGTTTTGTTGACCAACCAATAAATGCGCGATATGTGAGTGATGTTTGGAAGATTGGTGTTTTTTTGGAGGATGGGTTCGAAAGAGTGGGAATCGAGAACGCGATTAAACGAGTGATGATGGATAAAGAAGGAGAAGAAATCCGTGAGAGAATAACTTCTCTTAAGGATAAGGTAAATCCCTCACTTGACAAAGGTGGCTCTTCTTGTCACTCACTAAACAAGTTGGTGGAATATATTTCATCATTATAA

MVTNGNDTSLRSRNHRRIILFPLPFQGHINPMLQLANILHTHHFKITIIHAKFNSLNPSKYPHFNFNPIDEGFSEIADELGTNKDASYFLRYLNESCVDPFRDCLGGLLAQPGEEKVACLITDAGFYFTQAVADELKIPRIVLRTSSIGCVLAYDAIPFYSKKDCFLLTKEDPDYEASVPEYPLLKFKDIAKIAPNPQGMGDFVSNKITLMRASSGIIWNTYKELEESDLETITQTIPVPHFTLGPFHKYFPATSSSLIEQDRTILSWLDKQAPKSVVYVSFGSVAYITESEFQEVAHGLANTGLPFLWVVRPGIVAGTKWLESLPENFLEKMGDRGRIVKWSPQQEVLAHPATGCFWTHNGWNSTLESICEGVPMICSPCFVDQPINARYVSDVWKIGVFLEDGFERVGIENAIKRVMMDKEGEEIRERITSLKDKVNPSLDKGGSSCHSLNKLVEYISSL

SrUGT79A1

ATGACTTTAACCTGCAAACCTAAGGAACTACACTTAGTGATGCTCCCTTTTTTTGCATTTGGTCACATTAGTCCTTTTGTTCAGTTAACCAACAAGTTATCATCGTATCTCGGTGTCAAGATTTCTTTCTTGGCTGCTTCCGCTAGTGTCAGCCGTATTGAAACCATGCTCAACTCTACCACCAACACCAAAGTCATCCCTCTAACTCTACCGCGTGTCGATGGTCTCCCTGAAGGCGTTGAAAACACCTCCGACACCTCACCAGCCACCATCGAGCTTCTCAAAGTCGCATTAGACCTCATGCGACCCCAAATTAAAACCGTACTAGCTAATCTTAAACCTAATTTTGTCTTCTTTGACTTTGCGCAATGGTGGTTGCCCGAAATGGCGTCTGAACTCGGCATAAAAACAGTATTTTTTTCTGTTTTTATGCCGAGCAACTTGGCATTTGTTGCCACGTGGTTCACCCACGATAAGGTCCCAACTATAGAAGTAATGAAGAAGCCTTCATCCGTGTTCCCAGATCTACAACTACCCGAAGCCATAACTTTAAAGACTTTTGAAGCGCTAGATTTCATGTATATCTTCAAGAGCTTTCATGGCACACTAAGTGTATTCGATCGGTTGATGAAATGCTTCAATGGATGCAATGCTGTACTCATCAAGTCATGTAGAGAAATGGAAGCACCGTACATCGACTACCTTAGCAACCAAGTTAAAAAGCCAGTTCTTCTAATCGGTCCGGTGGTTCCTGAGCCACACTCCGGCGAGTTAGATGAAACATGGGCCAACTGGTTGAGCCAATTTCCGGCTAAATCGGTTATATATTGTTCTTTCGGGAGTGAAACGTTTCTAACCGACGATCAAATTAGGGAATTAGCTTTAGGGTTGGAACTCACCGGACTTCCATTCTTCCTGGTGTTGAATTTTCCGGCGAATGTTGATAAATCTGCAGAACTGAAAAGAACACTACCTGATGGGTTTCTTAAAAGAGTGAAGGATAAAGGGATTGTACACTCAGGGTGGGTGCAACAACGACACATTTTGGCGCACGTTAGTGTGGGGTGTTATGTGTTTCATGCTGGTTTTAGCTCAGTGGTTGAAGGTCTGATTAATGATTGTCAGCTGGTGATGCTGCCATTAAAAGGAGATCAACTTACGAATTCTAAAGTGATTGCTTCAGATTGGAAAGCTGGAGTTGAAGTAAACAGGAGAGATGAAGATGGGTATTTTGGGAAAGATGATGTTTTTGAAGCTGTGAAGAGTGTTATGATGGAGACTGAAAAAGAACCAGCAAAATCTATAAGAGAAAATCAAAAGAAATGGAAAGAGTTTTTGCAGAACGATGAGATACATAGCAAGTATATTGCAGATTTTGTTGAGAACTTGAAGGCTCTTTCATAA

MTLTCKPKELHLVMLPFFAFGHISPFVQLTNKLSSYLGVKISFLAASASVSRIETMLNSTTNTKVIPLTLPRVDGLPEGVENTSDTSPATIELLKVALDLMRPQIKTVLANLKPNFVFFDFAQWWLPEMASELGIKTVFFSVFMPSNLAFVATWFTHDKVPTIEVMKKPSSVFPDLQLPEAITLKTFEALDFMYIFKSFHGTLSVFDRLMKCFNGCNAVLIKSCREMEAPYIDYLSNQVKKPVLLIGPVVPEPHSGELDETWANWLSQFPAKSVIYCSFGSETFLTDDQIRELALGLELTGLPFFLVLNFPANVDKSAELKRTLPDGFLKRVKDKGIVHSGWVQQRHILAHVSVGCYVFHAGFSSVVEGLINDCQLVMLPLKGDQLTNSKVIASDWKAGVEVNRRDEDGYFGKDDVFEAVKSVMMETEKEPAKSIRENQKKWKEFLQNDEIHSKYIADFVENLKALS

SrUGT83B1

ATGGCAAAAACTCATGTTCTAGCGATACCTTATCCGGCACAAGGCCATGTAATTCCTTTAATGGAGCTTGCTCAAGAGTTAGTCAAACAAGGAGTTAGGGTTACATTTATCAACACAGAGTTCAATCACAAGCTTATTGTGACAAGCAATTGTTTAGATAAATATGGTTACGGGGATATGATGCAAATGGTCTCAATCCCCGATGGTTTAGAATCATGGGAGGACAGAAGTGACCTTTGTAAGTTGACGATGTCAATATTAAAAACCATGCCCCAAAAGCTTGAAGAATTAATAGAGTCGATTAACAAAGAAGACAAAACTAAAGTTTGTTGTGTTATCGCCGATGGTTGCATGGGATGGGCCATACGAGTTGCGAAGAATATGGGAATTAGACGAGCCGCCTTCTGGCCTGCCTCAGTTGCAACATTGGCCTCAATGTTGTCTTTTCAAAAACTGATTGATGATGGGATTATAAACAACAAAGGCAAACCTCAAAGTCATGAGATAATCCGACTGTCAGAAACCATGCCACCTATAAAACCTAAGAACCTTGCTTGGGCATGCTTTGAGGACTCAGCTACAGTAGAAGCTGTTTTTCAAGCTGCAATACAGTGTGAAGAAGCTTCTAGACTAACTGAATGGTTTATATGTAACTCGTGCCCAGAGCTCGAGGTTGCAGCATTTAGCCTGTACCCACAGTTGTTGCCCATAGGACCTCTCCTGGCAACAAACCGGCTAGGTGACCAGACTGGCCACTTTTGGGAAGAAGACACCACCTGCTTAGAATGGCTTGATCAACAAGCAACATGTTCAGTCTTTTATATTGCGTTTGGGAGCTTTACTATTTTCAACCAAACTCAGCTTGAAGAACTGGCACTTGGAATTGAACTTTGTAACATACCATTCTTGTGGGTGGTGCGGCCAGGTATGACCAAGGAGACTAAGACTAATTTCCCAATTGGATTTATGGACAGAGTGGGGTCTCGTGGAAGAATCGTGAGTTGGGCACCACAACAGAAGGTCTTGGCTCATCCTTCTATAGCATGTTTCATGAGTCATTGTGGTTGGAACTCTACCATAGAAGGTGTCACAAATGGACTCCCTTTTTTGTGTTGGCCATACTTTGGTGATCAATTTCATAACGAGACTTATGTTTGTGACTTTTGGAAGACTGGTTTGGGTCTAGAAAAGGATGAGGCAGGTATCATCACTCGTGGAGAAATTAAAAGTAAGGTGGAGCGGCTGCTTAGTGACAAAACTTTCAAAGTTAACGCGTTTGACATTAAAGAAAAGGTTAAAAGTTGCATCAGTTTAAGGGGCTGCTCACGCAAAAATCTTACTATTTTTATTGAATGGATAAAAAAGAATGATGTAGATGCCAAGGATTAA

MAKTHVLAIPYPAQGHVIPLMELAQELVKQGVRVTFINTEFNHKLIVTSNCLDKYGYGDMMQMVSIPDGLESWEDRSDLCKLTMSILKTMPQKLEELIESINKEDKTKVCCVIADGCMGWAIRVAKNMGIRRAAFWPASVATLASMLSFQKLIDDGIINNKGKPQSHEIIRLSETMPPIKPKNLAWACFEDSATVEAVFQAAIQCEEASRLTEWFICNSCPELEVAAFSLYPQLLPIGPLLATNRLGDQTGHFWEEDTTCLEWLDQQATCSVFYIAFGSFTIFNQTQLEELALGIELCNIPFLWVVRPGMTKETKTNFPIGFMDRVGSRGRIVSWAPQQKVLAHPSIACFMSHCGWNSTIEGVTNGLPFLCWPYFGDQFHNETYVCDFWKTGLGLEKDEAGIITRGEIKSKVERLLSDKTFKVNAFDIKEKVKSCISLRGCSRKNLTIFIEWIKKNDVDAKD

SrUGT83B2

ATGGTAAAACCTCACGTCCTACTCCTACCCGGTCCGGCACAAGGCCATGTAAATCCTACAATCGAACTCGGTCTACGGTTAGTCGCACAAGGTGTAAAAGTCACACTCATCAACTCGGAAACAAGTCACAAGTTCATAACGAGCAATTGGGTGGCGCCCGATGGATGTGAGGATCTAATGCAGATGGTTTCCATCCCTGACGGGTTAGAACCAGGGGAAGATAGAAATGAATTTGGTAAGTTAATGGCGT

CGATGGAAAGATGTATGCCTAGCAAGCTCGAACAAGTTATAAAGACGATTAACGAAAAAGACGACAACAAAATCACGTGTCTTATTGTTGATTTTTGGATTGTGTGGGCTCTACGAGTCGCGAAGAAGATGGGAATTGGAAGAGTGAGCTTCTTTCCTGCATCGACAGCTACACTAGCCACCATGTTGAGCCTTCAGAAGTTGGTTGATGGTGGATTCATAAGCGACAATGGCATACCGCAAAATAGCGAGATGATTCGGTTGACAGAAGCCATGCCACCTATAAAACCCGAAAACCTCTTGTGGGCGAGTTATCGTGACTCAACTAGCATAGAGGATCATTTTCGGTATCATATAAGAATTAATGAATTAGCAACATTAATCGAATGGTTTATATGTAACTCAGCTGTTGAGCTAGAACCTGTAGCATTTAGCCTGTTCCCGAAGCTGTTGCCGGTAGGCCCTCTTTTGGCAAGCAACCGACTTGGTGATCAAGTAGGTCATTTTTGGCCCGCAGACTCCACTTGCTTATCATGGCTCGATCAACAACCTATATGTTCAGTCATTTACATAGCATTTGGGAGTATCACTATTATTAACCAAACTCAGTTCGAAGAACTAGCACTTGGTCTTGAACTTACCAACCGACCGTTCTTGTGGGTTGTGCGGCCTGGTATGACCAAGGAGACAACAGTTGCTTACCCAGATGGTTATATCAACCGAGTGGGGTCTCGTGGAAAAATTGTGACATGGGCACCTCAACAGAAGGTCTTGGCTCATCCTTCTGTAGCTTGTTTCATGAGTCACTGTGGTTGGAACTCAACTTTAGAAGGCGTGGCAAATGGACTCCCTATTTTGTGTTGGCCATACTTTGGTGATCAGGTTTACAACGAGACATACATTTGTGACGTATGGAAAACTGGGTTGGGGTTGAAGGTAGATGAAGAAGTGAGTATTGTTACACGAGAAGAAATAAAATGTAAGGTAGAAAAATTGCTTGGTGACACAACATTCAAATCTAAGGCCTTGGATCTTAAAGAAAAGGTCGCAAGTGGTGTCTCAAAAGGTGGATGTTCACACCGTAACCTTACCAAATTTATCGAATGGATACATAAAAAAGATGCGGATACCAATGATCATCATGAATCTAAGTGA

MVKPHVLLLPGPAQGHVNPTIELGLRLVAQGVKVTLINSETSHKFITSNWVAPDGCEDLMQMVSIPDGLEPGEDRNEFGKLMASMERCMPSKLEQVIKTINEKDDNKITCLIVDFWIVWALRVAKKMGIGRVSFFPASTATLATMLSLQKLVDGGFISDNGIPQNSEMIRLTEAMPPIKPENLLWASYRDSTSIEDHFRYHIRINELATLIEWFICNSAVELEPVAFSLFPKLLPVGPLLASNRLGDQVGHFWPADSTCLSWLDQQPICSVIYIAFGSITIINQTQFEELALGLELTNRPFLWVVRPGMTKETTVAYPDGYINRVGSRGKIVTWAPQQKVLAHPSVACFMSHCGWNSTLEGVANGLPILCWPYFGDQVYNETYICDVWKTGLGLKVDEEVSIVTREEIKCKVEKLLGDTTFKSKALDLKEKVASGVSKGGCSHRNLTKFIEWIHKKDADTNDHHESK

SrUGT84C1

ATGGGTTCAACTTCCGAACCAAATCAACAACCAAACGTGTTGCTCGTTACAGTTGCAGCTCAAGGTCATGTTAACCCAATGATAAGGTTCGGTAACTTACTTGTCTCCAAAGGTCTTCATGTCACTCTCGCCACTCACGATTATGCTCTCAACCACTGTTCGTCCATCGTCGGCGGCATCCACCTCGAGTTCTTCTCCGATGGTCTACCTCATGACTATAACCGACAAACCGGCGATTTCAATTACTACATGAACTCTCTACGTAAACACGGACCCATAAATCTATCTGCTTTAATCCGATCACACCGTCGGAAGTTTTCATGCATTATCAACACCCCTTTCGTGCCGTGGGCTGCTGACGTGGCGGCGGAGTTCCAGCTCCCGTGTGCGATGGTTTGGATCCAACCGTGCGCTATCTATCAGATATATTATTGTTATTACAATCGTTTGAACGAGTTTCCTACTGAAAGTAACCCTAATCTGAACGTGAAGTTACCCGGGCTGCCGGAGTTTTGCCCCGAAGAGTTACCGTCGTTTGTTCTTCCGTCGAATACGTTTCCTACGTTTGATAGCATACTGAAGGAAGTGTTTCATAACATGCACAAGATCAAATGGGTGTTGGGAAATTCGTTTATGGAACTCGAAAAAGAAGTGATAACGTCGATGAATGACGCCGGTCGGCCGTTTTGGCCGGTGGGACCGCTTGTTCCGGTGAGTCTTTTCGGAAAGATAGATCAAATCGGCGGCGATCTGAGTGGTTTCGATAAGTTTAAATCTGACAATGAAACTAACTGTTTTGAATGGTTAGATAAACAGCAACCGGCATCGGTTGTTTACATATCATTCGGAAGTCTTATATTTTCATCGGAGAAACAGATCGAAAGCATAGCAAGTGGTTTAAAAAGCTCAAAACGGCCGTTTCTGTGGGTGATAAAGTCGCCGGAAAATCAAGAAACAAAACAAGATTCGATCTTGGAAGAGATTAAGGAACAGGGTTTAATCGTGAAATGGAGTCCTCAAACGGCTGTATTATCACACCCATCGGTTGGG

TGTTTCTTGAGCCACTGTGGGTGGAACTCGTTGATTGAAAGTGTTACCGCCGGTGTGCCGGTGATTGCTTGCCCGCAGTGGACTGATCAGCCGACTAATGCTAAACTTGTGACTGATGTTTGGAATGTTGGGGTGAAATTGAATAAGAATTCGGAAGGGTTTTTTGTTGGGGAAGAAGTAGCGAGATGTGTGGATGAGATTATGAGCGGGTTGAGATCGGAGGAGTTTAGGAAGAATGCGGCGGAGTTAAAACGGGCGGCACGTGAGGCGGTGGCAGATGGTGGCTCGTCGGACGAGAATATAAATTTGTTTGTAAAAGAATTATTGTCTTCTTGCTCATGA

MGSTSEPNQQPNVLLVTVAAQGHVNPMIRFGNLLVSKGLHVTLATHDYALNHCSSIVGGIHLEFFSDGLPHDYNRQTGDFNYYMNSLRKHGPINLSALIRSHRRKFSCIINTPFVPWAADVAAEFQLPCAMVWIQPCAIYQIYYCYYNRLNEFPTESNPNLNVKLPGLPEFCPEELPSFVLPSNTFPTFDSILKEVFHNMHKIKWVLGNSFMELEKEVITSMNDAGRPFWPVGPLVPVSLFGKIDQIGGDLSGFDKFKSDNETNCFEWLDKQQPASVVYISFGSLIFSSEKQIESIASGLKSSKRPFLWVIKSPENQETKQDSILEEIKEQGLIVKWSPQTAVLSHPSVGCFLSHCGWNSLIESVTAGVPVIACPQWTDQPTNAKLVTDVWNVGVKLNKNSEGFFVGEEVARCVDEIMSGLRSEEFRKNAAELKRAAREAVADGGSSDENINLFVKELLSSCS

SrUGT84C2

ATGAGTTCTTTCGGTGACCAAACCAATCAACATACAAACATTCTTCTAGTTACTCTTTCTGCTCAAGGTCACATAAACCCCATCCTAAGATTCGGCAAAAATCTTGTCACTAAAGGGCTCAACGTCACTCTAGCCACCACCCATTCCGCCCTAAACACCATCTCCTCCGTACCAACCACCATCGGTGGGGTCCACCTTGAGTTCTTCTCCGATGGTCTACCAATCGACTACAACCGAAAGGCTGATATCGATTACTACATGGATACACTAACCGAATTAGGACCCGATAACCTCTTGAAATTAATCCGATCACATCAACGTAAATTTGCATGTATCATCCATACACCATTCGTGCCGTGGGTTGCTGACGTGGCAGCCGAGGTTGGTGTTCCGAACGCCATGCTTTGGATCCAACCATGCGCTTTGTACCAAATATATCATCGTTATTACAATCGGCTCGATGAGTTCCCGACTGGAAGTGACCCGAATATGAGCGTTAAGCTGCCCGGACTGCCCGTTTTTGGTTTGGATGAGTTACCATCGTTTGTTCTTCCGTCTAATACCCTTCGTTGCTTTGATACAATACTAAACAAAGCGTTTACTAACATGCATAAAGTGAAGTGGGTTCTCGGTAATTCGTTCATGGAGCTCGAGAAAGATGTAATTCTGTCGCTGAATAATTCCGGCCATGTGTTTTTGCCCGTCGGACCAACAGTTCCGGCGACGATTTTGGGTCAGGAGAAAGATGCGGATTTTGATCTATTTGAATCTAACGATGACAGTAATTGTATGGATTGGTTAAACAAACAAAAACCCTCATCGGTTGTTTATATTTCATTCGGGACTCTAATCTCTTCATCGGGGAAAGAAATCGAGAACATTGCAGCTGGTCTGAAACGCACAAAACGACCGTTTTTATGGGTGATAAGGTCACCGGAAAATCAAGAACCGACGGAGTTAGAGTTCTTGGAGGAGATCAAGGATCAAGGGTTGATTGTGAGCTGGAGCCCGCAAACCGTGGTTTTGTCACACCCGTCGGTTGGGTGTTTCGTGAGTCACTGCGGGTGGAACTCGTTGCTGGAAAGTATCGCCGCCGGTGTACCGGTGGTTGCTTGTCCGAAGTGGACCGATCAGCCGACAAACGCGAAACTCGTGACGGATGTTTGGGGGGTGGGTGTGAAGGTGAAGAAGAATTCTGAAGGTGGTGTTTGTGGGGAGGATGTGGGAAGATCCGTGGAAGAAGTTATGAGTGGTCCGAGATCGGAAGAGTTTAGGAAGAATGCGTTGGAGTTGAAGGCGGCGGCGCGTGAGGCGTTGACGGATGGTGGTTCATCGGACAAGAATATTCAGATATTTGTAAATGAAATCATCTTCTTGTAA

MSSFGDQTNQHTNILLVTLSAQGHINPILRFGKNLVTKGLNVTLATTHSALNTISSVPTTIGGVHLEFFSDGLPIDYNRKADIDYYMDTLTELGPDNLLKLIRSHQRKFACIIHTPFVPWVADVAAEVGVPNAMLWIQPCALYQIYHRYYNRLDEFPTGSDPNMSVKLPGLPVFGLDELPSFVLPSNTLRCFDTILNKAFTNMHKVKWVLGNSFMELEKDVILSLNNSGHVFLPVGPTVPATILGQEKDADFDLFESNDDSNCMDWLNKQKPSSVVYISFGTLISSSGKEIENIAAGLKRTKRPFLWVIRSPENQEPTELEFLEEIKDQGLIVSWSPQTVVLSHPSVGCFVSHCGWNSLLESIAAGVPVVACPKWTDQPTNAKLVTDVWGVGVKVKKNSEGGVCGEDVGRSVEEVMSGPRSEEFRKNALELKAAAREALTDGGSSDKNIQIFVNEIIFL

SrUGT84C3

ATGAGTTCTTTCGGTGACCAAACCAATCTACATACAAACATTCTTCTAGTTACTCTTTCTGCTCAAGGTCACATAAACCCCATCCTAAGATTCGGCAAAAATCTTGTCACTAAAGGGCTCAACGTCACTCTAGCCACCACCCATTCCGCCCTAAACACCATCTCCTCCGTACCAACCACCATCGGTGGGGTCCACCTTGAGTTCTTCTCCGATGGTCTACCAATCGACTACAACCGAAAGGCTGATATCGATTACTACATGGATACACTAACCGAATTAGGACCCGATAACCTCTTGAAATTAATCCAATCACATCAACGTAAATTTGCATGTATCATCCATACACCATTCGTGCCGTGGGTTGCTGACGTGGCAGCCGAGGTTGGTGTTCCAAACGCCATGCTTTGGATCCAACCATGCGCTTTGTACCAAATATATCATCGTTATTACAATCGGCTCGATGAGTTCCCGACTGGAAGTGACCCGAATATGAGCGTTAAGCTGCCCGGACTGCCCGTTTTTGGTTTGGATGAGTTACCATCGTTTGTTCTTCCGTCTAATACCCTTCGTTGCTTTGATACAATACTAAACAAAGCGTTTACTAACATGCATAAAGTGAAGTGGGTTCTCGGTAATTCGTTCATGGAGCTCGAGAAAGATGTAATTCTGTCGCTGAATAATTCCGGCCATGTGTTTTTGCCGGTCGGACCAACAGTTCCGGCGACGATTTTGGGTCAGGAGAAAGATGCGGATTTTGATCTATTTGAATCTAACGATGACAGTAATTGTATGGATTGGTT

AAACAAACAAAAACCCTCATCGGTTGTTTATATTTCATTCGGGACTCTAATCTCTTCATCGGGGAAAGAAATCGAGAACATTGCAGCTGGTCTGAAACGCACAAAACGACCGTTTTTATGGGTGATAAGGTCACCGGAAAATCAAGAACCGACGGAGTTAGAGTTCTTGGAGGAGATCAAGGATCAAGGGTTGATTGTGAGCTGGAGCCCGCAAACCGTGGTTTTGTCGCACCCGTCGGTTGGGTGTTTCGTGAGTCACTGCGGGTGGAACTCGTTGCTGGAAAGTATCGCCGCCGGTGTACCGGTGGTTGCTTGTCCGAAGTGGACCGATCAGCCGACAAACGCGAAGCTCGTGACGGATGTTTGGGGGGTGGGTGTGAAGGTGAAGAAGAATTCTGAAGGTGGTGTTTGTGGGGAGGATGTGGGAAGATCCGTGGAAGAAGTTATGAGTGGTCCGAGATCGGAAGAGTTTAGGAAGAATGCGTTGGAGTTGAAGGCGGCGGCGCGTGAGGCGTTGACGGATGGTGGTTCATCGGACAAGAATATTCAGATATTTGTAAATGAAATCATCTCTTCTTGTTAG

MSSFGDQTNLHTNILLVTLSAQGHINPILRFGKNLVTKGLNVTLATTHSALNTISSVPTTIGGVHLEFFSDGLPIDYNRKADIDYYMDTLTELGPDNLLKLIQSHQRKFACIIHTPFVPWVADVAAEVGVPNAMLWIQPCALYQIYHRYYNRLDEFPTGSDPNMSVKLPGLPVFGLDELPSFVLPSNTLRCFDTILNKAFTNMHKVKWVLGNSFMELEKDVILSLNNSGHVFLPVGPTVPATILGQEKDADFDLFESNDDSNCMDWLNKQKPSSVVYISFGTLISSSGKEIENIAAGLKRTKRPFLWVIRSPENQEPTELEFLEEIKDQGLIVSWSPQTVVLSHPSVGCFVSHCGWNSLLESIAAGVPVVACPKWTDQPTNAKLVTDVWGVGVKVKKNSEGGVCGEDVGRSVEEVMSGPRSEEFRKNALELKAAAREALTDGGSSDKNIQIFVNEIISSC

SrUGT84C4

ATGAGTTCTTTCGGTGACCAAACTAATCAACATACAAACATTCTTCTAGTTACTCTTTCTGCTCAAGGTCACATAAACCCCATCCTAAGATTCGGCAAAAATCTTGTCACTAAAGGGCTCAACGTCACTCTAGCCACCACCCACTCCGCCCTAAACACCATCTCCTCTGTACCAACCACCATCGGTGGGGTCCACCTTGAGTTCTTCTCCGATGGTCTACCAATCGACTACAACCGAAAGGCTGATATCGATTACTACATGGATACACTAACCGAATTAGGACCCGATAACCTCTTGAATTTAATCCGATCACATCAACGTAAATTTGCATGTATCATCCATACACCATTCGTGCCGTGGGTTGCTGACGTGGCAGCCGAGGTTGGTGTTCCGAACGCCATGCTTTGGATCCAACCATGCGCTTTGTACCAAATATATCATCGTTATTACAATCGGCTCGATGAGTTCCCGACTGGAAGTGACCCGAATATGAGCGTTAAGCTGCCCGGACTGCCCGTTTTTGGTTTGGATGAGTTACCATCGTTTGTTCTTCCGTCTAATACCCTTCGTTGCTTTGATACAATACTAAACAAAGCGTTT

ACTAACATGCATAAAGTGAAGTGGGTTCTCGGTAATTCATTCATGGAGCTCGAGAAAGATGTAATTCTGTCGCTGAATAATTCCGGCCATGTGTTTTTGCCGGTCGGACCAACAGTTCCGGCGACGATTTTGGGTCAGGAGAAAGATGCGGATTTTGATCTATTTGAATCTAACGATGACAGTAATTGTATGGATTGGTTAAACAAACAAAAACCCTCATCGGTTGTTTATATTTCATTCGGGACTCTAATCTCTTCATCGGGGAAAGAAATCGAGAACATTGCAGCTGGTCTGAAACGCACAAAACGACCGTTTTTATGGGTGATAAGGTCACCGGAAAATCAAGAACCGACGGAGTTAGAGTTCTTGGAGGAGATCAAGGATCAAGGGTTGATTGTGAGCTGGAGCCCGCAAACCGTGGTTTTGTCGCACCCGTCGGTTGGGTGTTTCGTGAGTCACTGCGGGTGGAACTCGTTGCTGGAAAGTATCGCCGCCGGTGTACCGGTGGTTGCTTGTCCGAAGTGGACCGATCAGCCGACAAACGCGAAGCTCGTGACGGATGTTTGGGGGGTGGGTGTGAAGGTGAAGAAGAATTCTGAAGGTGGTGTTTGTGGGGAGGATGTGGGAAGATCCGTGGAAGAAGTTATGAGTGGTCCGAGATCGGATGAGTTCAGGAAGAATGCGTTGGTGTTGAAGACGGCGGCGCGTGAGGCGTTGACGGATGGTGGTTCATCGGACAAGAATATTCAGATATTTGTAAATGAAATCATCTCTTCTTGTTTGTTACATTCGGAACAAAAGTAA

MSSFGDQTNQHTNILLVTLSAQGHINPILRFGKNLVTKGLNVTLATTHSALNTISSVPTTIGGVHLEFFSDGLPIDYNRKADIDYYMDTLTELGPDNLLNLIRSHQRKFACIIHTPFVPWVADVAAEVGVPNAMLWIQPCALYQIYHRYYNRLDEFPTGSDPNMSVKLPGLPVFGLDELPSFVLPSNTLRCFDTILNKAFTNMHKVKWVLGNSFMELEKDVILSLNNSGHVFLPVGPTVPATILGQEKDADFDLFESNDDSNCMDWLNKQKPSSVVYISFGTLISSSGKEIENIAAGLKRTKRPFLWVIRSPENQEPTELEFLEEIKDQGLIVSWSPQTVVLSHPSVGCFVSHCGWNSLLESIAAGVPVVACPKWTDQPTNAKLVTDVWGVGVKVKKNSEGGVCGEDVGRSVEEVMSGPRSDEFRKNALVLKTAAREALTDGGSSDKNIQIFVNEIISSCLLHSEQK

SrUGT85A8-1

ATGGCTTCAATAGCAGAAATGCAAAAGCCACATGCCATCTGCATCCCCTACCCAGCCCAAGGCCACATCAACCCCATGATGCAATTTGCTAAGCTCCTTCACTTCAAAGGCTTTCACATCTCTTTTGTCAATAACCACTACAACCATAAGCGGTTGCAGCGGTCCCGCGGTCTGTCCGCCCTCGAAGGTCTACCTGATTTTCATTTCTACTCGATTCCCGATGGCCTTCCACCTTCAAATGCTGAGGCCACCCAGTCGATCCCCGGGCTATGTGAGTCGATTCCTAAGCACAGTTTGGAACCATTTTGTGAATTGATCGCTACGCTAAATGGTTCGGACGTGCCACCTGTAAGCTGTATAATCTCTGATGGGGTCATGAGCTTTACGCTTCAAGCTGCCGAGAGGTTCGGGTTGCCGGAAGTTTTGTTCTGGACCCCAAGTGCTTGTGGGTTTTTGGCTTACACTCACTATCGAGATCTTGTGGATAAGGAGTATATTCCCCTCAAAGACACGAACGACTTGACAAATGGGTATTTAGAAACAAGCTTGGATTGGATTCCTGGGATGAAAAACATCCGATTAAAAGATTTCCCATCCTTTATTCGAACCACAGACATAAATGATATTATGCTCAATTATTTCTTGATTGAAACCGAAGCGATCCCAAAAGGCGTAGCGATCATTCTTAACACATTTGACGCGTTAGAAAAAGATAGTATTACGCCTGTACTTGCTCTAAATCCACAAATATACACCATTGGTCCATTACACATGATGCAACAATATGTCGATCATGATGAGAGACTCAAACACATTGGGTCCAACCTTTGGAAGGAAGATGTGAGCTGCATCAATTGGCTTGACACCAAAAAGCCTAATTCGGTTGTTTATGTGAACTTTGGAAGTATTACGGTTATGACGAAAGAACAACTGATCGAGTTTGGGTGGGGACTGGCTAATAGCAAGAAGGATTTCTTGTGGATAACGAGGCCTGATATTGTTGGAGGCAATGAAGCCATGATACCACCAGAGTTCATAGAGGAGACCAAAGAAAGGGGCATGGTTACTAGCTGGTGCTCTCAGGAAGAGGTTTTAAAACATCCATCAATCGGGGTATTCTTGACTCATAGTGGATGGAACTCGACCATTGAGAGTATTAGCAACGGTGTTCCCATGATTTGTTGGCCTTTTTTTGCAGAGCAACAAACAAATTGTCGGTATTGTTGTGTTGAATGGGAAATTGGATTGGAAATTGATACAGATGTGAAGAGAGAGGAGGTAGAGGCTCAAGTGAGGGAGATGATGGATGGGTCGAAAGGGAAGATGATGAAAAACAAGGCTTTGGAATGGAAGAAGAAGGCTGAAGAAGCGGTATCCATTGGTGGATCTTCTTATCTCAACTTTGAAAAATTAGTTACTGATATTCTTTTAAGAAAGTGA

MASIAEMQKPHAICIPYPAQGHINPMMQFAKLLHFKGFHISFVNNHYNHKRLQRSRGLSALEGLPDFHFYSIPDGLPPSNAEATQSIPGLCESIPKHSLEPFCELIATLNGSDVPPVSCIISDGVMSFTLQAAERFGLPEVLFWTPSACGFLAYTHYRDLVDKEYIPLKDTNDLTNGYLETSLDWIPGMKNIRLKDFPSFIRTTDINDIMLNYFLIETEAIPKGVAIILNTFDALEKDSITPVLALNPQIYTIGPLHMMQQYVDHDERLKHIGSNLWKEDVSCINWLDTKKPNSVVYVNFGSITVMTKEQLIEFGWGLANSKKDFLWITRPDIVGGNEAMIPPEFIEETKERGMVTSWCSQEEVLKHPSIGVFLTHSGWNSTIESISNGVPMICWPFFAEQQTNCRYCCVEWEIGLEIDTDVKREEVEAQVREMMDGSKGKMMKNKALEWKKKAEEAVSIGGSSYLNFEKLVTDILLRK

SrUGT85B1-1

ATGGGTTCGGTTCAAGAGAAAAAGGCGCCACATGTTGTGTGCATACCGGCACCACTTCAAGGTCACATTAACCCGATGCTAAAACTAGCCAAAATCCTACACTCCAAAGGCTTTCTTATCACCTTTGTCAACACCGAGTTTAACCACCAACGGCTCGTTAGGTCACAGGGGGTTGAAGCCCTACACGGGCTCCCAACCTTCCGGTTCGAGACCATCCCAGATGGTCTACCGCCACCTGAAAACAAAGATGCCACCCAAGATATCCCGACTCTAGCCAAGTCGGTTGATGAAAACTTTTTGGGTCCGTTTAAAAGTCTTGTAACCAAAGCGGGTGCTTTGTATGCACCCGTGACTTGTATCGTGTCTGACATGCTTATGTGCTTCACTCTTGATGCCGGTGCTGAATTGGATATCCCGGTAATACTCCATTGGACCAGTGGTACTGGTTCTTTGATATGTTACAATGAATATCCTAATCTATTGGAAAGCAAATTGATGCCCCTCAAAGATGCAAGTTATTTAGTGAATGGTTACTTAGATACGATTGTAGATTCTATCCCCATTTTGCATGGCATACGTTTAAGAGATTTCCCTCCCTTCATTAGAAAGATCTTTCCTGGTGATGATTTCATGGTTCAATTTTTGACTTCACAAGTAAACAAAGCAAAAAACGGATCTTCAGCTATCATTTTCAACACTTTTGATGAACTAGATCGTGATGTTTTAGACACACTCACTTCAATGTATCCTACATGTTATGGAATTGGTCCGTTACATCTACTAGAGAAACATGTTACCGATAAATCTCTTGATTTTGTGAAATCAAACCTTTGGAAAGAAGAACCCGAATGTTTAAAATGGTTAGATACACAAGCTCCATCATCAGTCATTTATGTGAATTTTGGTAGCATTACAGTAATGACACCTCAACAACTAGTCGAGTTTTGTTGGGGACTCGCAAAGAGCAACTATCCGTTCTTATGGATAATACGACCTGACCTTGTGATTGGTGATTCCGCGATGCTTCCACCCGAGTTTATAAAGGAAACAAGTGATAGAGGGATGTTGGTTGGATGGTGTCCTCAAGAAGAAGTTTTGAATCACCCGTCAATTGGAGGGTTTTTAACGCACAGTGGATGGAATTCAACGCTTGAAAGTATTTCGAGTGGTGTGCCGATGATTTGTTGGCCGTTTTTTGCGGATCAACAAACGAATTGCTGGTGGAGTTGCAACAAATGGGGTGTTTCCATGGAGATTGATAATAATGTGAAGAGTGATGAAGTTTCAAAGCTTGTGATTGAATTAATGGATGGAGAAAAAGGAAAGGAAATTAAGAAGAATGCCATTGACTTGAAGAATAAAGCTGAGGATGCATGTACCTCTCCTCTGGGTTCATCAGTGGCTAATTTGGAGAAAGTGGTTCAACTGATTCGTACATTTTCAAAATAA

MGSVQEKKAPHVVCIPAPLQGHINPMLKLAKILHSKGFLITFVNTEFNHQRLVRSQGVEALHGLPTFRFETIPDGLPPPENKDATQDIPTLAKSVDENFLGPFKSLVTKAGALYAPVTCIVSDMLMCFTLDAGAELDIPVILHWTSGTGSLICYNEYPNLLESKLMPLKDASYLVNGYLDTIVDSIPILHGIRLRDFPPFIRKIFPGDDFMVQFLTSQVNKAKNGSSAIIFNTFDELDRDVLDTLTSMYPTCYGIGPLHLLEKHVTDKSLDFVKSNLWKEEPECLKWLDTQAPSSVIYVNFGSITVMTPQQLVEFCWGLAKSNYPFLWIIRPDLVIGDSAMLPPEFIKETSDRGMLVGWCPQEEVLNHPSIGGFLTHSGWNSTLESISSGVPMICWPFFADQQTNCWWSCNKWGVSMEIDNNVKSDEVSKLVIELMDGEKGKEIKKNAIDLKNKAEDACTSPLGSSVANLEKVVQLIRTFSK

SrUGT85B1-3

ATGGGTTCGGTTCAAGAGAAAAAGGCGCCACATGTTGTGTGCATACCGGCACCACTTCAAGGTCACATTAACCCGATGCTAAAACTAGCCAAAATCCTACACTCCAAAGGCTTTCTTATCACCTTTGTCAACACCGAGTTTAACCACCAACGGCTCGTTAGGTCACAGGGGGTTGAAGCCCTACACGGGCTCCCAACCTTCCGTTTCGAGACCATCCCAGATGGTCTACCGCCACCTGAAAACAAAGATGCCACCCAAGATATCCCGACTCTAGCCAAGTCGGTTGATGAAAACTTTTTGGGTCCGTTTAAAAGTCTTGTAACCAATGTGGGTGCTTTGTATGCACCCGTGACTTGTATCGTGTCTGACATGCTTATGTGCTTCACTCTTGATGCCGGTGCTGAATTGGATATCCCGGTGATACTCCATTGGACCAGTGGTACTGGTTCTTTGATATGTTACAATGAATATCCTAATCTATTGGAAAGCAAATTGATGCCCCTCAAAGATGCAAGTTATTTAGTGAATGGTTACTTAGATACGATTGTAGATTCTATCCCCATTTTGCATGGCATACGTTTAAGAGATTTCCCTCCCTTCATTAGAAAGATCTTTCCTGGTGATGAGTTCATGGTTCAATTTTTGACTTCACAAGTAAACAAAGCAAAAAACGGATCTTCTGCTATCATTTTCAACACTTTTGATGAACTAGATCGTGATGTTTTAGACACACTCGCTTCAATGTATCCTCCATGTTATGGAATTGGTCCGTTACATCTACTAGAGAAACATGTTACCGATAAATCTCTTGATTTCGTGAAATCAAACCTTTGGAAAGAAGAACCCGAATGTTTAAAATGGTTAGATACACAAGCTCCATCATCAGTCATTTATGTGAATTTTGGTAGCATTACAGTAATGACACCTCAACAACTAGTCGAGTTTTGTTGGGGACTCGCAAAGAGCAACTATCCGTTCTTATGGATAATACGACCTGACCTTGTGATTGGTGATTCCGCGATGCTTCCACCCGAGTTTGTGAAGGAAACAAGTGATAGAGGGATGCTGGTTGGATGGTGTCCTCAAGAAGAAGTTTTGAATCACCCGTCAATTGGAGGGTTTTTAACGCACAGTGGATGGAATTCAACGCTTGAAAGTATTTCGAGTGGTGTGCCGATGATTTGTTGGCCGTTTTTTGCGGATCAACAAACGAATTGCTGGTGGAGTTGCAACAAATGGGGTGTTTCCATGGAGATTGATAATAATGTAAAGAGTGATGAAGTTTCAAAGCTTGTGATTGAATTAATGGATGGAGAAAAAGGAAAGGAAATTAAGAAGAATGCCATTGACTTGAAGAATAAAGCTGAGGATGCATGTACCTCTCCTCTTGGTTCATCAGTGGTTAATTTGGAGAAAGTGGTTCAACTGATTCATACATTTTCAAAATAA

MGSVQEKKAPHVVCIPAPLQGHINPMLKLAKILHSKGFLITFVNTEFNHQRLVRSQGVEALHGLPTFRFETIPDGLPPPENKDATQDIPTLAKSVDENFLGPFKSLVTNVGALYAPVTCIVSDMLMCFTLDAGAELDIPVILHWTSGTGSLICYNEYPNLLESKLMPLKDASYLVNGYLDTIVDSIPILHGIRLRDFPPFIRKIFPGDEFMVQFLTSQVNKAKNGSSAIIFNTFDELDRDVLDTLASMYPPCYGIGPLHLLEKHVTDKSLDFVKSNLWKEEPECLKWLDTQAPSSVIYVNFGSITVMTPQQLVEFCWGLAKSNYPFLWIIRPDLVIGDSAMLPPEFVKETSDRGMLVGWCPQEEVLNHPSIGGFLTHSGWNSTLESISSGVPMICWPFFADQQTNCWWSCNKWGVSMEIDNNVKSDEVSKLVIELMDGEKGKEIKKNAIDLKNKAEDACTSPLGSSVVNLEKVVQLIHTFSK

SrUGT85C1-1

ATGGATCAAATGGCAAAAATTGACGAGAAGAAACCTCATGTGGTGTTCATACCGTTTCCCGCACAAAGTCATATCAAGTGCATGCTCAAACTAGCCAGAATCCTACACCAAAAGGGCCTCTATATAACCTTCATCAACACCGACACGAACCATGAGCGACTCGTAGCCTCTGGTGGGACCCAATGGCTCGAGAATGCTCCTGGTTTTTGGTTCAAAACGGTTCCTGATGGGTTCGGTTCTGCTAAAGACGACGGTGTCAAGCCTACTGACGCTTTACGAGAACTCATGGATTACCTTAAAACCAATTTCTTTGATTTGTTTCTTGATCTTGTACTCAAGCTTGAAGTCCCGGCTACATGCATCATTTGTGATGGTTGCATGACTTTCGCGAACACAATTCGCGCGGCTGAAAAACTTAATATTCCGGTTATTCTTTTCTGGACCATGGCTGCTTGTGGATTCATGGCGTTTTACCAGGCTAAAGTTTTAAAGGAGAAAGAAATTGTCCCAGTTAAAGATGAAACTTATTTGACCAATGGATATCTTGACATGGAAATAGACTGGATTCCTGGAATGAAAAGAATCCGTTTGAGGGATCTACCCGAGTTCATACTGGCCACAAAACAAAATTATTTTGCTTTTGAGTTTTTATTTGAAACCGCTCAATTGGCCGATAAGGTCTCGCATATGATCATCCATACCTTTGAGGAACTTGAGGCTAGTCTTGTGAGTGAGATTAAATCCATATTTCCTAATGTTTACACCATTGGGCCTCTCCAGTTGCTTTTGAACAAAATTACACAAAAAGAAACTAACAACGATAGCTATAGCTTATGGAAGGAAGAACCCGAGTGTGTCGAGTGGCTAAACTCAAAGGAACCGAATTCTGTGGTGTATGTCAACTTTGGAAGTTTGGCGGTGATGTCTTTACAAGATTTGGTAGAATTTGGGTGGGGACTTGTTAATAGCAACCATTATTTTCTTTGGATTATACGCGCTAATTTGATTGATGGGAAGCCGGCGGTTATGCCTCAAGAACTCAAGGAGGCGATGAACGAGAAAGGGTTTGTAGGAAGCTGGTGTTCACAGGAAGAGGTGTTGAACCACCCTGCGGTTGGTGGGTTCTTGACACACTGTGGTTGGGGTTCGATAATTGAAAGCTTGTCAGCTGGAGTGCCAATGCTGGGTTGGCCGTCAATAGGTGACCAACGCGCTAATTGTAGACAAATGTGTAAGGAATGGGAGGTTGGTATGGAGATTGGGAAGAATGTGAAAAGGGATGAAGTTGAGAAGCTTGTGAGGATGTTAATGGAGGGATTGGAGGGTGAACGAATGAGGAAGAAAGCTTTGGAGTGGAAGAAAAGTGCAACACTGGCGACATGTTGTAATGGGTCATCTAGTTTGGATGTAGAGAAACTTGCTAATGAAATCAAGAAGTTATCAAGAAACTAG

MDQMAKIDEKKPHVVFIPFPAQSHIKCMLKLARILHQKGLYITFINTDTNHERLVASGGTQWLENAPGFWFKTVPDGFGSAKDDGVKPTDALRELMDYLKTNFFDLFLDLVLKLEVPATCIICDGCMTFANTIRAAEKLNIPVILFWTMAACGFMAFYQAKVLKEKEIVPLKDETYLTNGYLDMEIDWIPGMKRIRLRDLPEFILATKQNYFAFEFLFETAQLADKVSHMIIHTFEELEASLVSEIKSIFPNVYTIGPLQLLLNKITQKETNNDSYSLWKEEPECVEWLNSKEPNSVVYVNFGSLAVMSLQDLVEFGWGLVNSNHYFLWIIRANLIDGKPAVMPQELKEAMNEKGFVGSWCSQEEVLNHPAVGGFLTHCGWGSIIESLSAGVPMLGWPSIGDQRANCRQMCKEWEVGMEIGKNVKRDEVEKLVRMLMEGLEGERMRKKALEWKKSATLATCCNGSSSLDVEKLANEIKKLSRN

SrUGT85C1-2

ATGGATCAAATGGCAAAAATTGATGAGAAGAAACCTCATGTGGTGTTCATACCGTTTCCCGCACAAAGTCATATCAAGTGCATGCTCAAACTAGCCAGAATCCTACACCAAAAGGGCCTCTATATAACCTTCATCAACACCGACACGAACCATGAGCGACTCGTAGCCTCTGGTGGGACCCAATGGCTCGAGAATGCTCCTGGTTTTTGGTTCAAAACGGTTCCTGATGGGTTCGGTTCTGCTAAAGACGACGGTGTCAAGCCTACTGACGCTTTACGAGAACTCATGGATTACCTTAAAACCAATTTCTTTGATTTGTTTCTTGATCTTGTACTCAAGCTTGAAGTCCCGGCTACATGCATCATTTGTGATGGTTGCATGACTTTCGCGAACACAATTCGCGCGGCTGAAAAACTTAATATTCCGGTTATTCTTTTCTGGACCATGGCTGCTTGTGGATTCATGGCGTTTTACCAGGCTAAAGTTTTAAAGGAGAAAGAAATTGTCCCAGTTAAAGACTGGATTCCTGGAATGAAAAGAATCCGTTTGAGGGATCTACCCGAGTTCATACTAGCCACAAAACAAAATTATTTTGCTTTTGAGTTTTTATTTGAAACCGCTCAATTGGCCGATAAGGTCTCGCATATGATCATCCATACCTTTGAGGAACTTGAGGCTAGTCTTGTGAGTGAGATTAAATCCATATTTCCTAATGTTTACACCATTGGGCCTCTCCAGTTGCTTTTGAACAAAATTACACAAAAAGAAACTAACAACGATAGCTATAGCTTATGGAAGGAAGAACCCGAGTGTGTCGAGTGGCTAAACTCAAAGGAACCGAATTCTGTGGTGTATGTCAACTTTGGAAGTTTGGCGGTGATGTCTTTACAAGATTTGGTAGAATTTGGGTGGGGACTTGTTAATAGCAACCATTATTTTCTTTGGATTATACGCGCTAATTTGATTGATGGGAAGCCGGCGGTTATGCCTCAAGAACTCAAGGAGGCGATGAACGAGAAAGGGTTTGTAGGAAGCTGGTGTTCACAGGAAGAGGTGTTGAACCACCCTGCGGTTGGTGGGTTCTTGACACACTGTGGTTGGGGTTCGATAATTGAAAGCTTGTCAGCTGGAGTGCCAATGCTGGGTTGGCCGTCAATAGGTGACCAACGCGCTAATTGTAGACAAATGTGTAAGGAATGGGAGGTTGGTATGGAGATTGGGAAGAATGTGAAAAGGGATGAAGTTGAGAAGCTTGTGAGGATGTTAATGGAGGGATTGGAGGGTGAACGAATGAGGAAGAAAGCTTTGGAGTGGAAGAAAAGTGCAACACTGGCGACATGTTGTAATGGGTCATCTAGTTTGGATGTAGAGAAACTTGCTAATGAAATCAAGAAGTTATCAAGAAACTAG

MDQMAKIDEKKPHVVFIPFPAQSHIKCMLKLARILHQKGLYITFINTDTNHERLVASGGTQWLENAPGFWFKTVPDGFGSAKDDGVKPTDALRELMDYLKTNFFDLFLDLVLKLEVPATCIICDGCMTFANTIRAAEKLNIPVILFWTMAACGFMAFYQAKVLKEKEIVPVKDWIPGMKRIRLRDLPEFILATKQNYFAFEFLFETAQLADKVSHMIIHTFEELEASLVSEIKSIFPNVYTIGPLQLLLNKITQKETNNDSYSLWKEEPECVEWLNSKEPNSVVYVNFGSLAVMSLQDLVEFGWGLVNSNHYFLWIIRANLIDGKPAVMPQELKEAMNEKGFVGSWCSQEEVLNHPAVGGFLTHCGWGSIIESLSAGVPMLGWPSIGDQRANCRQMCKEWEVGMEIGKNVKRDEVEKLVRMLMEGLEGERMRKKALEWKKSATLATCCNGSSSLDVEKLANEIKKLSRN

SrUGT85C1-3

ATGGATCAAATGGCAAAAATTGACGAGAAGAAACCTCATGTGGTGTTCATACCGTTTCCCGCACAAAGTCATATCAAGTGCATGCTCAAACTAGCCAGAATCCTACACCAAAAGGGCCTCTATATAACCTTCATCAACACCGACACGAACCATGAGCGACTCGTAGCCTCTGGTGGGACCCAATGGCTCGAGAATGCTCCTGGTTTTTGGTTCAAAACGGTTCCCGATGGGTTCGGTTCTGCTAAAGACGACGGTGTCAAGCCTACTGACGCTTTACGAGAACTCATGGATTACCTTAAAACCAATTTCTTTGATTTGTTTCTTGATCTTGTACTCAAGCTTGAAGTCCCGGCTACATGCATCATTTGTGATGGTTGCATGACTTTCGCGAACACAATTCGCGCGGCTGAAAAACTTAATATTCCGGTTATTCTTTTCTGGACCATGGCTGCTTGTGGATTCATGGCGTTTTACCAGGCTAAAGTTTTAAAGGAGAAAGAAATTGTCCCACTTAAAGATGAAACTTATTTGACCAATGGATATCTTGACATGGAAATAGACTGGATTCCTGGAATGAAAAGAATCCGTTTGAGGGATCTACCCGAGTTCATACTAGCCACAAAACAAAATGATTTTGCTTTTGAAGTTTTCTTTGAAACCGCTCAATTGGCCGATAAGGTCTCGCATATGATCATCCATACCTTTGAGGAACTTGAGGCTAGTCTTGTGAGTGAGATTAAATCCATATTTCCTAATGTTTACACCATTGGGCCTCTCCAGTTGCTTTTGAACAAAATTACACAAAAAGAAACTAACAACGATAGCTATAGCTTATGGAAGGAAGAACCCGAGTGTGTCGAGTGGCTAAACTCAAAGGAACCGAATTCTGTGGTGTATGTCAACTTTGGAAGTTTGGCGGTGATGTCTTTACAAGATTTGGTAGAATTTGGGTGGGGACTTGTTAATAGCAACCATTATTTTCTTTGGATTATACGCGCTAATTTGATTGATGGGAAGCCGGCGGTTATGCCTCAAGAACTCAAGGAGGCGATGAACGAGAAAGGGTTTGTAGGAAGCTGGTGTTCACAGGAAGAGGTGTTGAACCACCCTGCGGTTGGTGGGTTCTTGACACACTGTGGTTGGGGTTCGATAATTGAAAGCTTGTCAGCTGGAGTGCCAATGCTGGGTTGGCCGTCAATAGGTGACCAACGCGCTAATTGTAGACAAATGTGTAAGGAATGGGAGGTTGGTATGGAGATTGGGAAGAATGTGAAAAGGGATGAAGTTGAGAAGCTTGTGAGGATGTTAATGGAGGGATTGGAGGGTGAACGAATGAGGAAGAAAGCTTTGGAGTGGAAGAAAAGTGCAACACTGGCGACATGTTGTAATGGGTCATCTAGTTTGGATGTAGAGAAACTTGCTAATGAAATCAAGAAGTTATCAAGAAACTAG

MDQMAKIDEKKPHVVFIPFPAQSHIKCMLKLARILHQKGLYITFINTDTNHERLVASGGTQWLENAPGFWFKTVPDGFGSAKDDGVKPTDALRELMDYLKTNFFDLFLDLVLKLEVPATCIICDGCMTFANTIRAAEKLNIPVILFWTMAACGFMAFYQAKVLKEKEIVPLKDETYLTNGYLDMEIDWIPGMKRIRLRDLPEFILATKQNDFAFEVFFETAQLADKVSHMIIHTFEELEASLVSEIKSIFPNVYTIGPLQLLLNKITQKETNNDSYSLWKEEPECVEWLNSKEPNSVVYVNFGSLAVMSLQDLVEFGWGLVNSNHYFLWIIRANLIDGKPAVMPQELKEAMNEKGFVGSWCSQEEVLNHPAVGGFLTHCGWGSIIESLSAGVPMLGWPSIGDQRANCRQMCKEWEVGMEIGKNVKRDEVEKLVRMLMEGLEGERMRKKALEWKKSATLATCCNGSSSLDVEKLANEIKKLSRN

SrUGT85C2-1

ATGGATGCAATGGCTACAACTGAGAAGAAACCACACGTCATCTTCATACCATTTCCAGCACAAAGCCACATTAAAGCCATGCTCAAACTAGCACAACTTCTCCACCACAAAGGACTCCAGATAACCTTCGTCAACACCGACTTCATCCACAACCAGTTTCTTGAATCATCGGGCCCACATTGTCTAGACGGTGCACCGGGTTTCCGGTTCGAAACCATTCCGGATGGTGTTTCTCACAGTCCGGAAGCGAGCATCCCAATCAGAGAATCACTCTTGAGATCCATTGAAACCAACTTCTTGGATCGTTTCATTGATCTTGTAACCAAACTTCCGGATCCTCCGACTTGTATTATCTCAGATGGGTTCTTGTCGGTTTTCACAATTGACGCTGCAAAAAAGCTTGGAATTCCGGTCATGATGTATTGGACACTTGCTGCCTGTGGGTTCATGGGTTTTTACCATATTCATTCTCTCATTGAGAAAGGATTTGCACCACTTAAAGATGCAAGTTACTTGACAAATGGGTATTTGGACACCGTCATTGATTGGGTTCCGGGAATGGAAGGCATCCGTCTCAAGGATTTCCCGCTGGACTGGAGCACTGACCTCAATGACAAAGTTTTGATGTTCACTACGGAAGCTCCTCAAAGGTCACACAAGGTTTCACATCATATTTTCCACACGTTCGATGAGTTGGAGCCTAGTATTATAAAAACTTTGTCATTGAGGTATAATCACATTTACACCATCGGCCCACTGCAATTACTTCTTGATCAAATACCCGAAGAGAAAAAGCAAACTGGAATTACGAGTCTCCATGGATACAGTTTAGTAAAAGAAGAACCAGAGTGTTTCCAGTGGCTTCAGTCTAAAGAACCAAATTCCGTCGTTTATGTAAATTTTGGAAGTACTACAGTAATGTCTTTAGAAGACATGACGGAATTTGGTTGGGGACTTGCTAATAGCAACCATTATTTCCTTTGGATCATCCGATCAAACTTGGTGATAGGGGAAAATGCAGTTTTGCCCCCTGAACTTGAGGAACATATAAAGAAAAGAGGCTTTATTGCTAGCTGGTGTTCACAAGAAAAGGTCTTGAAGCACCCTTCGGTTGGAGGGTTCTTGACTCATTGTGGGTGGGGATCGACCATCGAGAGCTTGTCTGCTGGGGTGCCAATGATATGCTGGCCTTATTCGTGGGACCAGCTGACCAACTGTAGGTATATATGCAAAGAATGGGAGGTTGGGCTCGAGATGGGAACCAAAGTGAAACGAGATGAAGTCAAGAGGCTTGTACAAGAGTTGATGGGAGAAGGAGGTCACAAAATGAGGAACAAGGCTAAAGATTGGAAAGAAAAGGCTCGCATTGCAATAGCTCCTAACGGTTCATCTTCTTTGAACATAGACAAAATGGTCAAGGAAATCACCGTGCTAGCAAGAAACTAG

MDAMATTEKKPHVIFIPFPAQSHIKAMLKLAQLLHHKGLQITFVNTDFIHNQFLESSGPHCLDGAPGFRFETIPDGVSHSPEASIPIRESLLRSIETNFLDRFIDLVTKLPDPPTCIISDGFLSVFTIDAAKKLGIPVMMYWTLAACGFMGFYHIHSLIEKGFAPLKDASYLTNGYLDTVIDWVPGMEGIRLKDFPLDWSTDLNDKVLMFTTEAPQRSHKVSHHIFHTFDELEPSIIKTLSLRYNHIYTIGPLQLLLDQIPEEKKQTGITSLHGYSLVKEEPECFQWLQSKEPNSVVYVNFGSTTVMSLEDMTEFGWGLANSNHYFLWIIRSNLVIGENAVLPPELEEHIKKRGFIASWCSQEKVLKHPSVGGFLTHCGWGSTIESLSAGVPMICWPYSWDQLTNCRYICKEWEVGLEMGTKVKRDEVKRLVQELMGEGGHKMRNKAKDWKEKARIAIAPNGSSSLNIDKMVKEITVLARN

SrUGT85C2-2

ATGGATGCAATGGCTACAACTGAGAAGAAACCACACGTCATCTTCATACCATTTCCAGCACAAAGCCACATTAAAGCCATGCTCAAACTAGCACAACTTCTCCACCACAAAGGACTCCAGATAACCTTCGTCAACACCGACTTCATCCACAACCAGTTTCTTGAATCATCGGGCCCACATTGTCTAGACGGTTCACCGGGTTTCCGGTTCGAAACCATTCCGGATGGTGTTTCTCACAGTCCGGAAGCGAGCATCCCAATCAGAGAATCACTCTTGAGATCCATTGAAACCAACTTCTTGGATCGTTTCATTGATCTTGTAACCAAACTTCCGGATCCTCCGACTTGTATTATCTCAGATGGGTTCTTGTCGGTTTTCACAATTGACGCTGCAAAAAAGCTTGGAATTCCGGTCATGATGTATTGGACACTTGCTGCCTGTGGGTTCATGGGTTTTTACCATATTCATTCTCTCATTGAGAAAGGATTTGCACCACTTAAAGATGCAAGTTACTTGACAAATGGGTATTTGGACACCGTCATTGATTGGGTTCCGGGAATGGAAGGCATCCGTCTCAAGGATTTCCCGCTGGACTGGAGCACTGACCTCAATGACAAAGTTTTGATGTTCACTACGGAAGCTCCTCAAAGGTCACACAAGGTTTCACATCATATTTTCCACACGTTCGATGAGTTGGAGCCTAGTATTATAAAAACTTTGTCATTGAGGTATAATCACATTTACACCATCGGCCCACTGCAATTACTTCTTGATCAAATACCCGAAGAGAAAAAGCAAACTGGAATTACGAGTCTCCATGGATACAGTTTAGTAAAAGAAGAACCAGAGTGTTTCCAGTGGCTTCAGTCTAAAGAACCAAATTCCGTCGTTTATGTAAATTTTGGAAGTACTACAGTAATGTCTTTAGAAGACATGACGGAATTTGGTTGGGGACTTGCTAATAGCAACCATTATTTCCTTTGGATCATCCGATCAAACTTGGTGATAGGGGAAAATGCAGTTTTGCCCCCTGAACTTGAGGAACATATAAAGAAAAGAGGCTTTATTGCTAGCTGGTGTTCACAAGAAAAGGTCTTGAAGCACCCTTCGGTTGGAGGGTTCTTGACTCATTGTGGGTGGGGATCGACCATCGAGAGCTTGTCTGCTGGGGTGCCAATGATATGCTGGCCTTATTCGTGGGACCAGCTGACCAACTGTAGGTATATATGCAAAGAATGGGAGGTTGGGCTCGAGATGGGAACCAAAGTGAAACGAGATGAAGTCAAGAGGCTTGTACAAGAGTTGATGGGAGAAGGAGGTCACAAAATGAGGAACAAGGCTAAAGATTGGAAAGAAAAGGCTCGCATTGCAATAGCTCCTAACGGTTCATCTTCTTTGAACATAGACAAAATGGTCAAGGAAATCACCGTGCTAGCAAGAAACTAG

MDAMATTEKKPHVIFIPFPAQSHIKAMLKLAQLLHHKGLQITFVNTDFIHNQFLESSGPHCLDGSPGFRFETIPDGVSHSPEASIPIRESLLRSIETNFLDRFIDLVTKLPDPPTCIISDGFLSVFTIDAAKKLGIPVMMYWTLAACGFMGFYHIHSLIEKGFAPLKDASYLTNGYLDTVIDWVPGMEGIRLKDFPLDWSTDLNDKVLMFTTEAPQRSHKVSHHIFHTFDELEPSIIKTLSLRYNHIYTIGPLQLLLDQIPEEKKQTGITSLHGYSLVKEEPECFQWLQSKEPNSVVYVNFGSTTVMSLEDMTEFGWGLANSNHYFLWIIRSNLVIGENAVLPPELEEHIKKRGFIASWCSQEKVLKHPSVGGFLTHCGWGSTIESLSAGVPMICWPYSWDQLTNCRYICKEWEVGLEMGTKVKRDEVKRLVQELMGEGGHKMRNKAKDWKEKARIAIAPNGSSSLNIDKMVKEITVLARN

SrUGT85C3-2

ATGGATGCAGTGGTCGAAACAGAAAAGAAGAAACCACACGTCATCTGTATGCCGTTTCCAGATCTAAGCCACATAAAAGCCATGCTCAAACTAGCCGAGCTTCTCTACCACAAAGGACTACAGATAACCTTCATCAACACCGATTTCGTCCACAACCGGTTTCTTGAATCAGGAGGACCACACTGTTTAGACGGTCCACCTGGTTTCCGGTTTGAAACCATTCCAGATGGTGTTACTCGCAGATCGGAAGCTAGCATCCACAACACCAGAGAACTACTCAAGTCCGTCGAAACCATCTTCTTGGATCGTTTCATTGACCTTGTAACCAAACTTCCGGATCCTCCGACTTGTATTATCTGTGATGGTTTCTTGTCGGTTTTCACAATTGACGCTGCAAAAAAGCTTGGAATCCCGATTATGATGTATTGGACACTTGCTGCCTGTGGCTTCATGGGGTTTTATCAAATGCATTCTCTCATTGAGAAAGGATTTGCACCGCTTAAAGATGAAAGTTATTTGACAAATGGGTATTTAGACACCGTCGTTGATTGGGTTCCGGGAATGGAAAGCATCCGTCTTAAGGAGTTCCCATTGGTTTGGAACACTGACTTGAATGATAAACTTCTAACATTCTGCAAGGAAGCTCCCCAAAGGTGTCACTCGGTTTCAAATCATATTTTCCACACGTTTGATGAGTTAGAGCCTAGTGTTATCAAAGCTTTGTCATCTATATATTCTCGCGTTTACGCCATCGGCCCACTACAACTACTTCTTGATCAGATACCTGAAGAAAAAAAGCAAACTGGAATTTCAGGTTTGAATGGATACAGTTTTGTGAAAGAAGAACCCGAGTGTTTTAAGTGGCTTCAATCTAAGGAACCATATTCTGTCATTTATGTAAATTTTGGGAGTTCAACATTAATGTCTTTAGAAGACTTGATAGAATTTGGTTGGGGACTTGTTAATAGCAACCACTATTTCCTTTGGATCATCCGATCTAACTTGATAAATGGAGAATCTGCAGTTTTGCCTCTTGAATTAGACGAACATATAGAAAAGAGAGGCTTTATTGCAAGCTGGTGTTCACAAGAAAAGGTCTTGAACCACCCTTCGGTTGGAGGGTTCTTGACTCATTGTGGGTGGGGATCGACCATCGAGAGCTTGTCTGCTGGGGTGCCAATGATATGCTGGCCTTATTCGTGGGACCAGCTGACCAACTGTAGGTATATATGCAAAGAATGGGAGGTTGGGCTCGAGATGGGAACCAAAGTGAAACGAGATGAAGTCAAGAGGCTTGTACAAGAGTTGATGGGAGAAGGAGGTCACAAAATGAGGAACAAGGCTAAAGATTGGAAAGAAAAGGCTCGCATTGCAATAGCTCCTAACGGTTCATCTTCTTTGAACATAGACAAAATGGTCAAGGAAATCACCGTGCTAGCAAGAAACTAG

MDAVVETEKKKPHVICMPFPDLSHIKAMLKLAELLYHKGLQITFINTDFVHNRFLESGGPHCLDGPPGFRFETIPDGVTRRSEASIHNTRELLKSVETIFLDRFIDLVTKLPDPPTCIICDGFLSVFTIDAAKKLGIPIMMYWTLAACGFMGFYQMHSLIEKGFAPLKDESYLTNGYLDTVVDWVPGMESIRLKEFPLVWNTDLNDKLLTFCKEAPQRCHSVSNHIFHTFDELEPSVIKALSSIYSRVYAIGPLQLLLDQIPEEKKQTGISGLNGYSFVKEEPECFKWLQSKEPYSVIYVNFGSSTLMSLEDLIEFGWGLVNSNHYFLWIIRSNLINGESAVLPLELDEHIEKRGFIASWCSQEKVLNHPSVGGFLTHCGWGSTIESLSAGVPMICWPYSWDQLTNCRYICKEWEVGLEMGTKVKRDEVKRLVQELMGEGGHKMRNKAKDWKEKARIAIAPNGSSSLNIDKMVKEITVLARN

SrUGT85D1

ATGGAGAACATGAAGATGAAACCTCATGCAGTTTGCATACCATTTCCAGCACAAGGTCACATAAATCCCATGCTAAAACTTGCCAAAATCCTTCATTCCAAAGGCTTCCATATAACCTTCGTCAACACCGAATTCAACCACCGACGACTCCTTAAATCGCAAGGTTCAGAAATGCTAAACGCGTACACATCATTTGAGTTTGAGACCATTCCCGATGGGCTTCCGCCATCTGGAAACCAAGATGTGACCCAAGACATCCCGTCACTATGCATTTCCACCTCTGAAACATGTCTTAAACCTTTTAAAACCCTCCTCTCAAAACTTAATAATAACGCGAATGTACCACCGGTGAGTTGTATAGTTTCTGATGGTATAATGAGCTTCACACTTGACGCGTCGGATGAATTGGGTATCCCTAATGTTCTGTTTTGGACAACAAGCGCTTGTGGCTTTTTGGCTTATGCACACTATATCACTCTCAAGCAAAATGGAATCATTCCTGCAAAAGATTCGGACCATTTATCCAATGGGTACTTGGATACCATAGTTGATTGTATACCTAGCATGAAAGGCATACGCTTGAAGGACATCCCAACGTTCATTAGAACCACAAATCCAAACGAACCCATGATCAATTTTTGCATCCGAGAACCAGCAAGAGCCAAAAAAGCTTCAGCAATAATACTCAACACTTTCGAAGAGCTAGAACAAGAAGTCTTAAACGAGTTATCTTCCATGTATCCTCCTATTTTCACAATCGGACCATTACACAACATTGCAAAAATCGTTGTGGGAAATGATCTGAAATTGTTGGGTTCGAATCTGTGGAAAGAAGACACCGAATGCATTGAATGGCTTGACTCGAAAGAAGCTAATTCGGTTGTTTATGTGAACTTTGGAAGCATAACCGTGATGACACCACAACAACTAGTTGAGTTCTCTTGGGGTCTTGCAAATAGTAACCAGACCTTTTTATGGGTCATCCGACCCGACTTGGTTACTGGAGACTCACGGATTTTGCAACCGGAGTTTCTTGAGGCGACTCGTGAGAGGGGTTTGTTAACAAGTTGGTGCCCGCAAGAAAAGGTTTTAAATCATCCGTCAATTGGAGGGTTTTTGACGCATTGCGGGTGGAACTCGACCATTGAGAGTATATCGAGTGGGGTTCCAATGATTTGTTGGCCGTTTTTCGCGGAACAACAGACTAATTGTTGGTATAGTTGTAATCAATGGGGCATTGGGATGGAGATTGATAGTGATGTGGACAGAAAACAGGTTGAAAAGCTTGTGAGGACATTAATGGTGGAAGAAAAAGGTGAAGAGATGAGAAAGATGGCGATGGTTTGGAAGAAAAAGGCCGAATCCTCATCGTCTTTGTTGAACATAGACAACTTGATCAACCAAGTGCTTCTTTAA

MENMKMKPHAVCIPFPAQGHINPMLKLAKILHSKGFHITFVNTEFNHRRLLKSQGSEMLNAYTSFEFETIPDGLPPSGNQDVTQDIPSLCISTSETCLKPFKTLLSKLNNNANVPPVSCIVSDGIMSFTLDASDELGIPNVLFWTTSACGFLAYAHYITLKQNGIIPAKDSDHLSNGYLDTIVDCIPSMKGIRLKDIPTFIRTTNPNEPMINFCIREPARAKKASAIILNTFEELEQEVLNELSSMYPPIFTIGPLHNIAKIVVGNDLKLLGSNLWKEDTECIEWLDSKEANSVVYVNFGSITVMTPQQLVEFSWGLANSNQTFLWVIRPDLVTGDSRILQPEFLEATRERGLLTSWCPQEKVLNHPSIGGFLTHCGWNSTIESISSGVPMICWPFFAEQQTNCWYSCNQWGIGMEIDSDVDRKQVEKLVRTLMVEEKGEEMRKMAMVWKKKAESSSSLLNIDNLINQVLL

SrUGT85E1

ATGCAGGTCTCTACAATGCCGATGGATCATGAGAAGAAACCCCATGCATTGTTCGTACCATATCCGGCTCAAAGTCACGTCAAATGTATGTTGAAACTAGCATGGCTACTGCACCACAAAGGCATTCAAATAACCTTCGTTAACATCCAGTCCATCCACAACCGGCTCGATCCTGTTGGTGCCTCCGGTTTTCAGTTTAAAATAGTTCCTGATGATTTCCCTAGTTCCGATAGTGTAACGCCGAACCCAGAAATCTTGTTTCGGTATCTCGCCACCGACTTCTTGGGCTCCTTACTTGATGTTGCAGTGGGACTCGAAACTCCCGTCACTTGTATCGTGTCCGATGCTTTGTTTAGACTCATGAAAATCAATCACGTGGCTGAGAGGCTCAAAGTGGCCAACGTAACGCTTTGGCCGGTTGCTGCTTGTGGGTTTCTTAATATATACCGAGCTAAAGTTATGGAGGCAAAAGGAATTCTCCCACTTAAAGATGAAAGTTGCTTGACAAATGGGTACCTTGATATGGAGATAGAGTGGATACCAGGAATGGAAAAATTCCGTCTGCGCGATCTACCAAGGAATTTCTTAGCCATAAAACGTGATGGTCATCAACAAGAGATTATCGAGGAAGAAGATAGGATGGATGACAATTCCTCACACATGATTATCCATACTTTTTATGAACTAGAGGACACTCTTGTTACTAAGCTTCGAACCATTTTTCCTCGAATCTACAACGTCGGGCCTCTGCAGTTGCATCTGAATCAGATGGAGAATTCGAGTTTCAATGGCTATAGTTTACTTAAGGAAGAACCCGAGTGTGTAGAGTGGCTCCAGTCGAAGGAACCCAACTCTGTGTTGTATATCAGCTTTGGAAGCGAGACAGTTATCTCTTCTCAAGAGTTACTGGAATTCGGGTGGGGACTTGTGAATAGTAACCATCATTTTCTTTGGATCATACGTGTCGATTTGGTTGATGGCAAGCCAACGGTTTTGCCTCAAGAACTTGAGGATGCAATTAAAAAAAGAGGGTTTATCGCGAGCTGGTGTTCACAAGAAGAGGTTCTAAACCACCCTTCGATTGGTGGGTTCTTAACACATGGTGGGTGGGGTTCGGTGATTGAGAGCTTGTCGGCTGGGGTGCCGATGATTTGTTTTCCAAGCTCCCATGATCAACCGATTAACTGTAAATACGTGTGTGAGAAATGGGAGGTTGGCATAGAGGTCAAGAGTCCACTAAAGAGGGGTGAAGTTGAAGCACTTGTAAGTACTTTAATGGCAGGGATTGAGGGTAAGAGAATGAGAAAGAAGGCAACGGAGTGGAAGCGACTGGCCGAAATCGCGACACGTCCCGGTGGCTCATCATGTTCAAGCATTCAGAAACTTGTTAACGAAATTACCTTGATGTCAAGAAAGTAG

MQVSTMPMDHEKKPHALFVPYPAQSHVKCMLKLAWLLHHKGIQITFVNIQSIHNRLDPVGASGFQFKIVPDDFPSSDSVTPNPEILFRYLATDFLGSLLDVAVGLETPVTCIVSDALFRLMKINHVAERLKVANVTLWPVAACGFLNIYRAKVMEAKGILPLKDESCLTNGYLDMEIEWIPGMEKFRLRDLPRNFLAIKRDGHQQEIIEEEDRMDDNSSHMIIHTFYELEDTLVTKLRTIFPRIYNVGPLQLHLNQMENSSFNGYSLLKEEPECVEWLQSKEPNSVLYISFGSETVISSQELLEFGWGLVNSNHHFLWIIRVDLVDGKPTVLPQELEDAIKKRGFIASWCSQEEVLNHPSIGGFLTHGGWGSVIESLSAGVPMICFPSSHDQPINCKYVCEKWEVGIEVKSPLKRGEVEALVSTLMAGIEGKRMRKKATEWKRLAEIATRPGGSSCSSIQKLVNEITLMSRK

SrUGT86B1

ATGGCTGATCGGAGAACTGAAAATCCTCATGCCATATTAATACCATTACCTCTTCAAGGTCACCTCATCCCTTTCGTTCATCTTGCCATCAAGTTAGCATCTAAAGGATTCACCATCACCTTCATCAACACCGAATCAGTCCACCATAGCATCACCAACTCCTCACCGGAATATTCCACCGGCAGCGATCTCTTTGCAGATGCACATAAATCCGGTCTCGATATAAGGTACGCCACCGTGAGTGATGGTCTTCCGGTAGGGTTTGATCGATCCCTGAACCATGACCAGTTCATGGAGTGTCTTTTTCATGTGTTTTCGGCTCACGTTGATGAAATTGTGGGAAATTTGGTGAAACATGATCCGTCGATCAGCTGTTTGGTAGCTGATAGCTTTTATGTTTGGCCGTTGATGATCTCAAAGAAGTATAAGTTGGTTAATATATCATTCTGGACTGAACCTGCTTTGGTTTTGAATTTGTATTATCATTTGGATTTGCTAAAGAAAAATGGTCACTTTGATCCACTTGATAAGTATGATGATGTCATAGATTACATACCCGGGGTCGTATCAATCAAACCAACAGACATGATGTCATATCTTCAAGCCACTAACACGAACACCATAGTCCATAGAATCATACGTAAGGCGTTGTTTGAAGTAACAAGGAGTGCTGATATCATCATATGTAACACAATACAAGAACTTGAACCTAATACAATTTCAGCAATGAATCAAATACAACCTTTTTATGCAATCGGTCCAATTTTCCCTAATGACTTCACTCGAGAACTTGTGTCGACAAGCTTATGGTGCGAGCAAGATTGCACCCGTTGGCTCGATAGTAAACCTCCCGGTTCAGTTTTGTATGTATCATTTGGTAGTTATGCTCACATTAGCAAACATGATCTTGAAGAGATAGCTTATGGTCTCCTACGAAGTGGTGTCAATTTTGTTTGGGCCCTTCGGCCCGATATAGTGAGTTCTAGTGACCCAAGTGCTTTGCCTATTGGATTTGAAGCCCAAGTTAAAGATCAAGGGTTGATTGTTCCTTGGTGTCATCAAAAGACGGTCCTTTCACATCTGTCGGTAGGTGGGTTTCTGACACATTGCGGGTGGAACTCGATTTTGGAAAGCGTTTGGTGTGGTGTACCTTTGATTTGTTTTCCACTTTTAACGGATCAATTCACTAATAGGAAATTAGTAGTTGATGATTGGAAAATTGGGATAAATTTATGTGAAAGGAGGAATTTGGTTGACAGAGAAGAAGTGGAAAAGAAAGTGAAAGAATTGATGCAAGAGAAGTCATATGAATTTAGGGTTGAAGTCAAGAAAGTTAAAAGAACACTAGAAGATGCATTGGGTACGGGTGGATCATCTCAGATAAATCTGGACCAATTCATTAGTCAAGTTATAGTAAAAGCTAAACAAATAAAGTGA

MADRRTENPHAILIPLPLQGHLIPFVHLAIKLASKGFTITFINTESVHHSITNSSPEYSTGSDLFADAHKSGLDIRYATVSDGLPVGFDRSLNHDQFMECLFHVFSAHVDEIVGNLVKHDPSISCLVADSFYVWPLMISKKYKLVNISFWTEPALVLNLYYHLDLLKKNGHFDPLDKYDDVIDYIPGVVSIKPTDMMSYLQATNTNTIVHRIIRKALFEVTRSADIIICNTIQELEPNTISAMNQIQPFYAIGPIFPNDFTRELVSTSLWCEQDCTRWLDSKPPGSVLYVSFGSYAHISKHDLEEIAYGLLRSGVNFVWALRPDIVSSSDPSALPIGFEAQVKDQGLIVPWCHQKTVLSHLSVGGFLTHCGWNSILESVWCGVPLICFPLLTDQFTNRKLVVDDWKIGINLCERRNLVDREEVEKKVKELMQEKSYEFRVEVKKVKRTLEDALGTGGSSQINLDQFISQVIVKAKQIK

SrUGT88B1-2

ATGGAGTCCTCTAAGGTGATCCTGTATCCTTCTCCCGGAATCGGCCATCTTGTTTCCATGGTGGAGCTTGGAAAACTCATCCACACCCACCACCCTTCACTCTCCGTTATCATCCTCGTACTTCCGGCTACATATGAAACCGGGTCCACCACTACATACATCAACACCGTCTCCACCACCACCCCCTCCGTCACCTTCCACCACCTCCCCGTTATCCCTCTTCCACCAGACTCATCTTCTGAATTCATAGACCTTGCCTTCGATATCCCTCAACTTTACAACCCGGTCGTCTACAACACCCTCGTAGCCATCTCCGAAACCTCAACCATCAAAGCTGTCATCCTTGATTTCTTTGCAAACGCAGCTTTTCAGATCTCTAAAAGTCTCGATCTTCCCACTTACTACTTCTATACCAGTGGTGCCTCTGGTCTCTGTGCGTTCTTACATTTTCCAACCATCTACAAAACATATTCCGGAAACTTTAAAGATCTAGATACTTTCATTAATATTCCCGGGGTACCTCCCATTCATTCTTCCGATATGCCCACGGTTATGTCTGATAAGGAAAGTAATTCCTACAAAAACTTCGTAAAAACCTCAAATAACATGGCAAAATCTTCCGGAGTCATTGCAAACAGCTTCTTGCAGTTGGAGGAAAGAGCTGCTCAAACTCTCCGAGATGGTAAATCCATCACGGACGGTCCCTCTCCACCTATTTATCTAATCGGGCCTTTAATCGCTAGCGGCAATCAAGTTGATCATAACGAAAACGAGTGTCTAAAATGGCTGAACACACAACC

TAGTAAAAGTGTAGTGTTTTTGTGCTTTGGGAGCCAGGGTGTGTTTAAGAAAGAACAATTGAAGGAAATAGCGGTTGGGTTAGAGAGAAGTGGGCAAAGATTTTTATGGGTGGTGCGAAAGCCGCCATCAGATGACGGTTCAGGTGGTAAAGAGTTCGGTCTTGATGATGTTCTTCCTGAAGGGTTTGTAGCCAGGACTAAAGAAAAGGGTCTGGTGGTGAAGAACTGGGCGCCTCAACCAGCGATTCTTGGTCATGAATCGGTGGGAGGATTTGTGAGTCATTGCGGGTGGAACTCGTCGCTTGAAGCGGTTGTTTTTGGTGTGCCGATGGTGGCATGGCCGTTGTACGCAGAGCAGAAGATGAACAGAGTGTATTTGGTTGAGGAAATAAAGGTGGCACTTTGGTTGAGAATGTCGGTAGATGGGTTTGTGAGTGCAGAGGCGGTGGAGGAGACGGTGAGACAGTTAATGGATGGGAGAAGAGTGAGAGAACGGATTTTGGAGATGAGTACAAAAGCGAAGGCTGCGGTGGAGGACGGCGGTTCCTCTCGAGTTGATTTCTTCAAATTAACTGAGTCATGGACCCACAAGTGA

MESSKVILYPSPGIGHLVSMVELGKLIHTHHPSLSVIILVLPATYETGSTTTYINTVSTTTPSVTFHHLPVIPLPPDSSSEFIDLAFDIPQLYNPVVYNTLVAISETSTIKAVILDFFANAAFQISKSLDLPTYYFYTSGASGLCAFLHFPTIYKTYSGNFKDLDTFINIPGVPPIHSSDMPTVMSDKESNSYKNFVKTSNNMAKSSGVIANSFLQLEERAAQTLRDGKSITDGPSPPIYLIGPLIASGNQVDHNENECLKWLNTQPSKSVVFLCFGSQGVFKKEQLKEIAVGLERSGQRFLWVVRKPPSDDGSGGKEFGLDDVLPEGFVARTKEKGLVVKNWAPQPAILGHESVGGFVSHCGWNSSLEAVVFGVPMVAWPLYAEQKMNRVYLVEEIKVALWLRMSVDGFVSAEAVEETVRQLMDGRRVRERILEMSTKAKAAVEDGGSSRVDFFKLTESWTHK

SrUGT88C1

ATGGCTACCATAGTTTTGTATCCATCTCCAGCTATGGGTCACCTCATATCAATGGTGGAACTCGGAAAACTCATCACCAAACACCACCCATCTTTCTCCATCATCGTCCTCACTCTCATCCCCTCTTTCAACACCGGCACCACTGCCGCCTACGTCCGTCGCATCTCCGCCACTTTCCCCGCCATCACCTTCCACCACCTCCCCGACATCCCTCTTGACCCCCTACTTTTTCCGTCAATGGAAGCCATCATCGTCGAGCTTATTCGCCATAGCAATCCAAACGTCAAAAACGCACTTGAATCGATTTCTGCATCGTCGTCTAACATCTCCGCGTTTGTAATCGACACTTTTTGCACTCCGTCGATGCCGGTGGCGGATCAATTTAACCTACCGGTTTACTACTTCTTCACTTCCGGTGCTTGCTGTCTCGCACAGTTGCTTTACTTTCCGACGCTTGATAAAACCACGACTGAAAGTTTTAAAGATATGAACAAACTCATCCATTCGCCGGGGTTGCCACCGATACCGTCGTCGGAGATGGTGAGTACGATTCTGGATCGAACATCAATCGATTATTCCAATTTTCTCGAAAAATGCAAGCAATTTCCCAAATCAGCTGGAATCATCATCAACACATTTGAATCGCTGGAGCCAAAAGCGATTAAAGCAATAACTGACGGAGATTGTGTACCGGATCAGCCTACGCCGCCGATCTACTGTGTCGGACCGTTGGTGGCCACCGGTGGCGATGGTTCGCATGAGTGTTTGAGTTGGCTCGATTCGCAACCGAGTCGGAGTGTGGTGTATTTGTGTTTCGGGAGTTTGGGTGTGTTTTCGATTGAGCAGTTGAAGGAGATTGCAAACGGGTTGGAGATGAGTGGTCACCGGTTTCTTTGGGTGGTGAGAAGTCCACCGTCGGAGAAAAAAGAAGACCGGTTTCTGCCACCGCCGGAGCCGGAGTTGGATGTATTATTGCCGGAAGGTTTCTTGGATAGAACAAAAGATAGAGGGCTCGTTGTGAAGAAATGGGCCCCACAAGTGGTGGTTCTCGGCCACGAGTCGATAGGCGGGTTCGTGACGCACTGCGGATGGAACTCGGTTTTGGAAGCGGTTAGTTTCGGGGTTCCGATGGTGGCGTGGCCCCTATACGCAGAACAAAGGTTTAATAGGGTGGTGTTGAGAGATGAAATGAAGCTGGCATTATCAATGGACGAGTCGGACAATGGTATGGTGACGGCAGCAGAGGTGGAGAGGCGGGTTCGACAGTTAATGGAGACGGATGAAGGTGAAAATGTTAGGGCGATGGCCGCCGTGAGAAAAGTGGAGGCGGCGGCAGCGATTAGCGACGGTGGATCTTCTCGGATGGCTTTGGCAAAGTTAGTTGCATTGTGGTAG

MATIVLYPSPAMGHLISMVELGKLITKHHPSFSIIVLTLIPSFNTGTTAAYVRRISATFPAITFHHLPDIPLDPLLFPSMEAIIVELIRHSNPNVKNALESISASSSNISAFVIDTFCTPSMPVADQFNLPVYYFFTSGACCLAQLLYFPTLDKTTTESFKDMNKLIHSPGLPPIPSSEMVSTILDRTSIDYSNFLEKCKQFPKSAGIIINTFESLEPKAIKAITDGDCVPDQPTPPIYCVGPLVATGGDGSHECLSWLDSQPSRSVVYLCFGSLGVFSIEQLKEIANGLEMSGHRFLWVVRSPPSEKKEDRFLPPPEPELDVLLPEGFLDRTKDRGLVVKKWAPQVVVLGHESIGGFVTHCGWNSVLEAVSFGVPMVAWPLYAEQRFNRVVLRDEMKLALSMDESDNGMVTAAEVERRVRQLMETDEGENVRAMAAVRKVEAAAAISDGGSSRMALAKLVALW

SrUGT89A1

ATGATTTTCATACCTAATATTTTTATATTTTTGTCAACCCTGAAATCCGTTGTTATTTCCACTCCTCTTTTTCTCTCCCTCTTGCAAACCATGGCGACCTCAAAAAAAAGCTCACATATACTCGTGTTTCCATTTCCAGCACAAGGTCACATGCTTCCACTTCTAGACCTGACCCACCATCTAGCCACCCATGGTCTAACCATAACCATCTTGGTCACACCCAAAAACCTCCCAATCTTGAACCCACTTCTCTCATCTTCTCCCAACATCGAACCACTGGTCTTACCGTTCCCACCACACCCATCACTTCCATCCAGTGTAGAAAACGTCAAAGACATCGGGAACCATGGAAACGTATCCATCATCAATTCATTGGCTAAACTCAAAGACCCGATCATCAAATGGTTCAACAATCACCCGAACCCTCCTGTTGCCATCGTTCATGACTTCTTCCTCGGATGGACCCATCAGTTAGCTGATAAGTTACGGGTCCCCCGATTCTGTTTCTACTCATCCGGTGCGTTCTTAACCGCGGTTCTTGACTACTGCTGCAAGAATATATCATTCGTTCGATCACAGGACCTAACCGTCTTTCACGATCTGCCCAATTCGCCTAGTTTTCCTAGGGAGCATCTTCCATCTCTGATTCGGGTCTACAAAGAATCCGACCCGGAATGGGAATTGGTCATGGATGGTCATAGAGCACACGCATCGTGTTCGGGTTGGATTATGAATACCTTTGATGACTTGGAGTCTAGGTACATGGATTATTTGAGTAAGTTATTGGGACACGGGAGGGTTTTTGGAGTCGGGCCGGTTAGTTTACTTTCCGGATCAGATCCCATGACCCGTGGGCAATCAGAATCGGGTTCGGACTCAGATGTGGTCAGATGGCTCGATGACAGACCGGATGGGTCGGTTGTGTACGTGTGCTTTGGTAGCCAGAAGTTTCTTACAAGTGACCAAATGGAGGCTTTGGCTATTGGGCTTGAAGATAGTGGGGTCCATTATGTTTGGGTTGTGAAACCTGAACAAGGTGATTCGGTTCAAGTTGGGTCGGGTAGAGGGTTTGTGATAAAGGGTTGGGCTCCTCAAGTGACGATACTGAGTCACCGAGCCGTGGGTGGGTTTCTGAGTCACTGTGGGTGGAATTCAGCTTTGGAAGCGATTTTGGCTGGAGTAATGATACTAGCTTGGCCCATGGAGGCTGACCAGTATATTAATGCTAGGTTGTTAGTTGAGGACCATGGTGCGGCTGTGCGGGTTTGTGAAGGACCGAATACCGTACCTGACTCGGCCAAGTTGGCTCGAACAATTGCTGAGTCAATGAGTGAGGATAAAAGTGAGAAGTTGAAGGCAAAAGAATTGAAAAACAAAGCAATTGAAGCAGTAAAGGAGGGTGGGAGCTCATCAATGGAATTGGACAGGCTTGTTTTAGAGTTGGTTAACTTGGGTAAAAAATGA

MIFIPNIFIFLSTLKSVVISTPLFLSLLQTMATSKKSSHILVFPFPAQGHMLPLLDLTHHLATHGLTITILVTPKNLPILNPLLSSSPNIEPLVLPFPPHPSLPSSVENVKDIGNHGNVSIINSLAKLKDPIIKWFNNHPNPPVAIVHDFFLGWTHQLADKLRVPRFCFYSSGAFLTAVLDYCCKNISFVRSQDLTVFHDLPNSPSFPREHLPSLIRVYKESDPEWELVMDGHRAHASCSGWIMNTFDDLESRYMDYLSKLLGHGRVFGVGPVSLLSGSDPMTRGQSESGSDSDVVRWLDDRPDGSVVYVCFGSQKFLTSDQMEALAIGLEDSGVHYVWVVKPEQGDSVQVGSGRGFVIKGWAPQVTILSHRAVGGFLSHCGWNSALEAILAGVMILAWPMEADQYINARLLVEDHGAAVRVCEGPNTVPDSAKLARTIAESMSEDKSEKLKAKELKNKAIEAVKEGGSSSMELDRLVLELVNLGKK

SrUGT89A2-1

ATGCCGATCTCAGAGAAAAACTCACATGTACTCGTATTCCCATTTCCTGCACAAGGTCACATGCTCCCACTTCTGGACCTAACCCACCAACTAGCCACCCACGGTCTAACCATAACCATCTTGGTCACACCCAAAAACCTCCCCATCTTGAACCCACTTCTCTCATCTTCACCCAACATTCAACCCCTGGTCCTCCCCTTTCCACCGCACCCATCTCTCCCATCCGGTGTAGAACACGTCAGTCAAACCGGAATCCATGGAAACGTCCCCATCATTAACGCACTCGCTAAACTACACGAACCAATCATCCAATGGTTCAATTCCCACCCGAACCCACCTGTCGCCATCCTCCACGACTTCTTCCTCGGTTCGATCAATCACTTAGCCGATAAGTTACAGGTCCCGATGTTCTCTTTCTTCTCCTCCGGTGCGTTCTTCACCGCAGCGGTCAACTACTGCAGCAAGAACATATCACCGGTTCCATCTGATGACCCAATCGTCTTGCAAGATCTACCCAATTCGCCTACTTTCGTATGGGACCAAATTCCAAACCCGTTTCGGATCCACACCGAAGCCAACCCACCAAGGAAATTCGTCAAAGATGGGATTATCTCGAATGAATTAAGTTCAGGTTGGGTTGTTAATACCTTCGATGCGTTAGAATCTCCGTACATCGAACATTTAACAAACTTATTAGGCGATGGGAAGGTTTTTGGAGTCGGGCCGATTAGTTATCTTTCCGGGTCGGATCCCATGACACGTGGGCAATCGCAATCGGAATCGGGTTCGGATTTGGATGTGACTCAATGGCTCGACGGGAAGCCTGATGGGTCGGTTGTGTACGTGTGTTTTGGTAGTCAAAAGTTTCTTTCAAGTGGTCAAATGAACGCGTTGACTATTGGACTTGAAGATAGTGGGATTCATTATGTTTGGGTTGTGAAAACCGAAGAAGGTGTTTCGGTCCCATCCGGGTCGGATAGAGGATTTGTGATATCGGGTTGGGCTCCACAACTCGCGATATTGAATCACCGAGCCGTGGGTGGGTTTCTGAGTCACTGCGGTTGGAACTCGGTTTTGGAATCGATTTTAGCCGGAGTGATGATACTCGCTTGGCCAATGGAGGCTGACCAATATGTTAACGCTAGGTTGTTAGTTGATTCTCTTGGTGCGGCTGTGAAGGTTTGTGAAGGTACGGATACGGTACCCGACTCGACTGAGTTGACTCGCGTTATTGCTGAGTCAATGAGTGGTGATAACAATGAGAAGTTGAAGGCAAAAGAGTTGAAAAAGAAAGCAATTGAAGCAGTAAATGAAGGTGGGAGCTCATCAAAAGAGTTGGCAAGACTTGTTAAGGAGTTGGCTAACTTGCGCCAAAAATAA

MPISEKNSHVLVFPFPAQGHMLPLLDLTHQLATHGLTITILVTPKNLPILNPLLSSSPNIQPLVLPFPPHPSLPSGVEHVSQTGIHGNVPIINALAKLHEPIIQWFNSHPNPPVAILHDFFLGSINHLADKLQVPMFSFFSSGAFFTAAVNYCSKNISPVPSDDPIVLQDLPNSPTFVWDQIPNPFRIHTEANPPRKFVKDGIISNELSSGWVVNTFDALESPYIEHLTNLLGDGKVFGVGPISYLSGSDPMTRGQSQSESGSDLDVTQWLDGKPDGSVVYVCFGSQKFLSSGQMNALTIGLEDSGIHYVWVVKTEEGVSVPSGSDRGFVISGWAPQLAILNHRAVGGFLSHCGWNSVLESILAGVMILAWPMEADQYVNARLLVDSLGAAVKVCEGTDTVPDSTELTRVIAESMSGDNNEKLKAKELKKKAIEAVNEGGSSSKELARLVKELANLRQK

SrUGT89A2-2

ATGCCGATCTCAGAGAAAAACTCACATGTACTCGTATTCCCATTTCCTGCACAAGGTCACATGCTCCCACTTCTCGACCTAACCCACCAACTAGCCACCCACGGTGTAACCATAACCATCTTGGTCACACCCAAAAACCTCCCCATCTTGAACCCACTTCTCTCATCTTCACCCAACATTCAACCCCTGGTCCTCCCCTTTCCACCGCACCCATCTCTCCCATCCGGTGTAGAACACGTCAGTCAAACCGGAATCCATGGAAACGTCCCCATCATTAACGCACTCGCTAAACTACACGAACCAATCATCCAATGGTTCAATTCCCACCCGAACCCACCTGTCGCCATCCTCCACGACTTCTTCCTCGGTTCGATCAATCACTTAGCCGATAAGTTACAGGTCCCGATGTTCTCTTTCTTCTCCTCCGGTGCGTTCTTCACCGCAGCGGTCAACTACTGCAGCAAGAACATATCACCGGTTCCATCTGATGACCCAATCGTCTTGCAAGATCTACCCAATTCGCCTACTTTCGTATGGGACCAAATTCCAAACCCGTTTCGGATCCACACCGAAGCCAACCCACCAAGGAAATTCGTCAAAGATGGGATTATCGCGAATGAATTAAGTTCAGGTTGGGTTGTTAATACCTTCGATGCGTTAGAATCTCCGTACATCGAACATTTAACAAACTTATTAGGCGATGGGAAGGTTTTTGGAGTCGGGCCGATTAGTTATCTTTCCGGGTCGGATCCCATGACACGTGGGCAATCGCAATCGGAATCGGGTTCGGATTTGGATGTGACTCAATGGCTCGACGGGAAGCCTGATGGGTCGGTTGTGTACGTGTGTTTTGGTAGTCAAAAGTTTCTTTCAAGTGGTCAAATGAACGCATTGACTATTGGACTTGAAGATAGTGGGATTCATTATGTTTGGGTTGTGAAAACCGAAGAAGGTGTTTCGGTCCCATCCGGGTCGGATAGAGGATTTGTGATATCGGGTTGGGCTCCACAACTCGCAATATTGAATCACCGAGCCGTGGGTGGGTTTCTGAGTCACTGCGGTTGGAACTCGGTTTTGGAATCGATTTTAGCCGGAGTGATGATACTCGCTTGGCCAATGGAGGCTGACCAATATGTTAACACTAGGTTGTTAGTTGATTCTCTTGGTGCGGCTGTGAAGGTTTGTGAAGGTACGGATACGGTACCCGACTCGACTGAGTTGACTCGCGTTATTGCTGAGTCAATGAGTGGTGATAACAATGAGAAGTTGAAGGCAAAAGAGTTGAAAAAGAAAGCAATTGAAGCAGTAAATGAAGGTGGGAGCTCATCAAAAGAGTTGGCAAGACTTGTTAAGGAGTTGGCTAACTTGCGCCAAAAATAA

MPISEKNSHVLVFPFPAQGHMLPLLDLTHQLATHGVTITILVTPKNLPILNPLLSSSPNIQPLVLPFPPHPSLPSGVEHVSQTGIHGNVPIINALAKLHEPIIQWFNSHPNPPVAILHDFFLGSINHLADKLQVPMFSFFSSGAFFTAAVNYCSKNISPVPSDDPIVLQDLPNSPTFVWDQIPNPFRIHTEANPPRKFVKDGIIANELSSGWVVNTFDALESPYIEHLTNLLGDGKVFGVGPISYLSGSDPMTRGQSQSESGSDLDVTQWLDGKPDGSVVYVCFGSQKFLSSGQMNALTIGLEDSGIHYVWVVKTEEGVSVPSGSDRGFVISGWAPQLAILNHRAVGGFLSHCGWNSVLESILAGVMILAWPMEADQYVNTRLLVDSLGAAVKVCEGTDTVPDSTELTRVIAESMSGDNNEKLKAKELKKKAIEAVNEGGSSSKELARLVKELANLRQK

SrUGT89B2

ATGCCGATTTCCGACATTAACGCCGGATCTCACATCCTGGTTTTCCCGTATCCGGCGCAGGGTCACATGCTCACACTCCTCGATCTTACCCACCAATTAGCCATCAGAAACCTCACCATCACCATACTCGTCACGCCCAAAAACCTACCTACCATTTCTCCGCTTCTCGCCGCCCATCCGACCACCGTCTCCGCCCTCCTCCTCCCTCTTCCACCGCACCCCGCCATCCCCTCCGGCATCGAGAACGTCAAAGACCTTCCTAACGACGCCTTCAAAGCCATGATGGTCGCACTCGGAGACCTCTATAACCCCCTTCGAGATTGGTTTCGTAATCAACCGAATCCGCCGGTAGCCATCATCTCCGACTTCTTCTTGGGCTGGACCCACCACCTCGCCGTCG

AGCTCGGTATCCGCCGGTACACGTTTTCGCCGTCTGGTGCGTTAGCTCTTTCTGTCATATTTTCTCTCTGGCGATACCAACCCAAACGGATTGATGTAGAAAATGAAAAGGAGGCGATCAAGTTCCCGAAAATTCCGAACTCGCCGGAATATCCTTGGTGGCAGCTGTCTCCGATTTATCGGAGCTATGTCGAAGGAGATCCAGATTCGGAATTTATCAAAGATGGGTTTTTGGCTGATATAGCGAGTTGGGGGATTGTGATCAACTCGTTCACTGAGTTGGAACAAGTTTACGTTGACCATTTAAAACACGAACTCGGGCATGATCAGGTGTTTGCGGTCGGACCGTTACTCCCTCCGGGTGACAAGACATCCGGTCGAGGTGGGTCAAGCTCGAATGACGTGCTGTCATGGCTCGACACGTGTGCTGATCGGACGGTGGTGTACGTTTGTTTCGGAAGTCAAATGGTGTTGACGAATGATCAAATGGAAGTCGTCGCACTCGGGTTGGAAAAAAGCCGGGTCAAGTTCGTGTGGTCCGTTAAAGAACCAACCGTCGGACACGAAGCCGCGAATTACGGTCGGGTTCCACCGGGGTTTGAAGATCGGGTGTCGGGTAGGGGTCTTGTGATTCGAGGTTGGGTTCCCCAAGTGGCTATACTGAGTCATGACTCGGTAGGTGTGTTCTTGACTCACTGTGGATGGAACTCGGTCATGGAAGCGGTGGCTGCGGAGGTTTTGATGCTGACGTGGCCGATGAGTGCTGACCAGTTCTCAAATGCCACGTTGTTGCATGAGTTGAAAGTGGGAATCAAAGTATGTGAGGGATCGAATATTGTTCCTAACTCCGACGAGTTAGCCGAGTTGTTTAGTAAATCACTGAGTGACGAGACACGTTTGGAAAGAAAACGAGTTAAGGAGTTTGCGAAGTCAGCAAAGGAAGCAGTTGGTCCTAAAGGGAGTTCAGTCGGTGAGTTGGAGAGATTAGTTGCCAATTTGTCACTATAA

MPISDINAGSHILVFPYPAQGHMLTLLDLTHQLAIRNLTITILVTPKNLPTISPLLAAHPTTVSALLLPLPPHPAIPSGIENVKDLPNDAFKAMMVALGDLYNPLRDWFRNQPNPPVAIISDFFLGWTHHLAVELGIRRYTFSPSGALALSVIFSLWRYQPKRIDVENEKEAIKFPKIPNSPEYPWWQLSPIYRSYVEGDPDSEFIKDGFLADIASWGIVINSFTELEQVYVDHLKHELGHDQVFAVGPLLPPGDKTSGRGGSSSNDVLSWLDTCADRTVVYVCFGSQMVLTNDQMEVVALGLEKSRVKFVWSVKEPTVGHEAANYGRVPPGFEDRVSGRGLVIRGWVPQVAILSHDSVGVFLTHCGWNSVMEAVAAEVLMLTWPMSADQFSNATLLHELKVGIKVCEGSNIVPNSDELAELFSKSLSDETRLERKRVKEFAKSAKEAVGPKGSSVGELERLVANLSL

SrUGT90B1

ATGGCTTCATCACTTCCCGTTCCTACGGTTGGTTCGACACACCGACCTCACATAGTCTTGTTTCCGTTCATGTCTAAAGGTCACACCATCCCACTACTCCAACTAGCCCGGTTGCTCGTGAACCGTGGTTCCATGGTCACTGTTTTCACCACCAAAGCTAACCACCCATTCGTGGCTCAATTTCTTGAGCCCTACCCAATTGGTTCCATCTCGATCATAGACCTTAAGTTCCCTAACCATGTCGAGGGTCTACCGGAAGGCGTCGAGAGCACCGATAAGCTACCTTCGATCAAGCTTTTTAGGCAATTTGCGGTCGCAACAAAACTCATGCAGCCTCAATTTGAACAATCACTCGAGAAACTATCGAATGTTACGTGCATCCTTTCCGATGGTTTTTTGAGTTGGACGCTTGCATCGGCAAACAAGTTTGGGATCCCTCGGATGACGTTTTACGGGATGAACGCTTATTCAAGTGCCGTGTCTAAAGATGTCAGTTTAAGCCTGTGGGGACCCGAGTCGGATGATGAACTAATCACCGCCCCCGGGTTCCCGTGGATCAAAGTCACTAGAAATGACTTTGACGAGCCGTTTAATAAGCGTGATTCAACGAGTCCCCTTTTTGAATTCGTAATGGAGGCGGTTATAGCCTCGGCTAACAGTTATGGTCTGATCTTAAACAGCTTCTACGAGCTAGAGCCATTGTTCGTAGACTACTTAAACCGCGAGTCCAAACCCAAAGCTTGGTGTCTCGGACCACTTTGTCTAGTTGACACACTAGACAGTGCAGATAACAAACAAACAAACGTACCCAGTAATATTATTAGTACCTCACCGGATCAGAAACCGAAAGTCCCGGAATGGATAGAGTGGCTAGACCAAAAGCTAGCCAAAGGAAGCTCGGTTTTATACGTCGCGTTCGGTTCACAAGCCGAGATCTCAATCCAACAATTGGAAGCCATATCCAAAGGTTTGGAACAATCAGAAGTGAACTTCTTGTGGGTGGTGAGAAAGTGTGATCAAACAAATGTTCTCGACGAGCTTGAACAGCGAGTAGGCGAAAGAGGGATGATAGTTAACCAATGGGTAGACCAAAGGGATATTTTGAACCACGAGAGCGTGAACGGGTTCGTGAGTCACTGTGGTTGGAACTCAGCTCTAGAGAGCATATGTTCGGGGGTACCGATTCTAGCTTGGCCCATGATGGCTGAACAGCATCTAAATGCGCGAATGGTGATCGAGGAGATTAAGGTCGGGTTACGAGTCGAAACGTGTGATGGTTCGCTTAGAGGGTTTGTGAAACCAGATGGGTTGAAGAAGATGGTTAAGGAGTTGATGGAAGGTGAGAAGGGGAAAGAGGTTAGGAAGACGGTTAAGGCGGTTGGTGCAGCCGCGAAGCGAGCCATGGCGCATGGTGGTTCGTCTTGGCGGTCATTGAACGAGCTCATAAACGAGTTGCAGACTGTTAGAGTCTGTGGTAGTTAA

MASSLPVPTVGSTHRPHIVLFPFMSKGHTIPLLQLARLLVNRGSMVTVFTTKANHPFVAQFLEPYPIGSISIIDLKFPNHVEGLPEGVESTDKLPSIKLFRQFAVATKLMQPQFEQSLEKLSNVTCILSDGFLSWTLASANKFGIPRMTFYGMNAYSSAVSKDVSLSLWGPESDDELITAPGFPWIKVTRNDFDEPFNKRDSTSPLFEFVMEAVIASANSYGLILNSFYELEPLFVDYLNRESKPKAWCLGPLCLVDTLDSADNKQTNVPSNIISTSPDQKPKVPEWIEWLDQKLAKGSSVLYVAFGSQAEISIQQLEAISKGLEQSEVNFLWVVRKCDQTNVLDELEQRVGERGMIVNQWVDQRDILNHESVNGFVSHCGWNSALESICSGVPILAWPMMAEQHLNARMVIEEIKVGLRVETCDGSLRGFVKPDGLKKMVKELMEGEKGKEVRKTVKAVGAAAKRAMAHGGSSWRSLNELINELQTVRVCGS

SrUGT90B2

ATGGCTTCATCACTTCCGGTTCCGGCGGTTGGTTCGACCCACCGACCTCACATAGTCTTGTTTCCGTTCATGTCTAAAGGTCACACCATCCCACTACTCCAACTAGCCCGGTTGCTCGTGAACCGCGGGACCATGGTCACTGTTTTCACCACCAAAGCTAACCACCCATTTGTGGCTCAATTTCTTGAAACCTACCCAAACGGTTCCATCTCGATCATAGACCTTATGTTCCCTAACGATGTCGAGGGTGTGCCCAAAGGCGTCGAGAGCACCGATAAGCTACCTTCGATCAAGCTTTTTAGACAATTTGCGGTTGCAACCAAACTCATGCAGCCTCAATTTGAACAATCACTCGACAAACTATGGAATGTTACGTGCATCGTTTCCGATGGTTTTTTGAGTTGGACGCTTGCATCGGCAAACAAGTTTGGGATCCCACGGATGACGTTTTACGGGATGAACGCTTATTCGAGTGTTGTGTCTAAAGAAGTCGGTTTAAGCCTCTGGGGACCCGAGTCGGATGATGAACTAATAACCGTCCCCGGGTTCCCGTGGATCAAAGTCACTAGAAATGACTTTGACGAGCCGTTTAATCAGCGCGATTCAACGAGTCCTCTTTTTGAATTCGTAATGGAGGCGGTAATAGCCTCGGCTAACAGTTATGGTCTGATCTTAAACAGCTTCTACGAGCTAGAGCCATTGTTCGTAGACTACTTAAACCGCGAGTCCAAACCCAAAGCTTGGTGTGTCGGACCACTTTGTCTGGTTGACACACCAGACAGTGCAGATAACAAACAAACAAACGTACCCAGTAATATTATTAGTACCTCACCGGATGAGAAACCGAAAGTCCCGGAATGGATAGAGTGGCTAGACCAAAAGCTAGCTAAAGGAAGCTCGGTTTTATACGTCGCGTTCGGTTCACAAGCCGAGATCTCAATCCAACAATTGGAAGCCATATCCAAAGGTTTGGAACAATCAGAAGTGAACTTCTTGTGGGTGGTGAGAAAGTGTGATCAAACCAATGTTCTCGACGAGCTTGAACAGCGAGTAGGCGAAAGAGGGATGATAGTTAACCAATGGGTGAACCAAAGGGAGATTTTGAACCACAAGAGCGTGAACGGGTTCGTGAGTCACTGTGGTTGGAACTCGGTTCTAGAGAGCATATGTTCCGGGGTACCGATCCTAGCTTGGCCCATGATGGCTGAACAGCATCTGAATGCGCGAATGGTGGTTGAGGAGATTAAGGTCGGGTTACGAGTCGAAACGTGTGATGGTTCGGTTAGAGGGTATGTGAAACCAGATGGGTTGAAGAAGATGGTTAAGGAGTTGATGGAAGGTGAGAAGGGGAAAGAGGTTAGGAAGACGGTTAAGGCAGTTGGTGCAGCCGCGAAGCGAGCCATGGCGGATGGTGGTTCGTCTTGGCGGACGTTGAACGAGCTCATAAACGAGTTGCAGACTGTTAGAAACTGTGGTAGTTAA

MASSLPVPAVGSTHRPHIVLFPFMSKGHTIPLLQLARLLVNRGTMVTVFTTKANHPFVAQFLETYPNGSISIIDLMFPNDVEGVPKGVESTDKLPSIKLFRQFAVATKLMQPQFEQSLDKLWNVTCIVSDGFLSWTLASANKFGIPRMTFYGMNAYSSVVSKEVGLSLWGPESDDELITVPGFPWIKVTRNDFDEPFNQRDSTSPLFEFVMEAVIASANSYGLILNSFYELEPLFVDYLNRESKPKAWCVGPLCLVDTPDSADNKQTNVPSNIISTSPDEKPKVPEWIEWLDQKLAKGSSVLYVAFGSQAEISIQQLEAISKGLEQSEVNFLWVVRKCDQTNVLDELEQRVGERGMIVNQWVNQREILNHKSVNGFVSHCGWNSVLESICSGVPILAWPMMAEQHLNARMVVEEIKVGLRVETCDGSVRGYVKPDGLKKMVKELMEGEKGKEVRKTVKAVGAAAKRAMADGGSSWRTLNELINELQTVRNCGS

SrUGT91C1

ATGGATCAAGAACCACTTCACATCGCGATGTTTCCATGGTTAGCCATGGGTCATCTCATACCCTTTTTTCACTTATCAAAAATCTTAGCTCACAAAGGCCATCAAATCTCATACATTTCCACTTCAAGAAATCTAGAACGAATTCCCAAAATACCCCCCAAACTATCCCATAATATCAAACTTATCTCACTCCCATTTCCAAAAGTGGAAAATTTACCAGAACTTGCAGAGTCTTCCATGGATATCCCTTACCAAAAATCCCAATTTCTAAAAATAGCATTTGACTTACTTGAACCATCTATTTTGACTTTTCTTCAAACCTCAAAACCAAGAGTTGACTTTATCATCTTTGACTATGCTTCCCATTGGCTACCTTCACTTGCTTCAAAATTTAATATCTCAACTGCTTACTTTAGCCTTTTTACTGCTGCAACACAAGGTTTTCTTGGTCCTCCATCTTTATTGTCAAATACCGCGCTTATGAGGTCAAATCCTGAGGATTTTTGTCGGGTGCCGGAGTGGGTCCCGTTTGATTCAGATGTCAGGTATCGTATCCACGAGTTAACAAAGTATACTGAGGGTGCGGTTGGGAACGAGTCAGGCGTATTGGATACCGTAAGGTTTCTAGTGTCGATCGACGGTTGTGATTTGGTCTTGTTCAGAACAAGTTATGAGTTTGAACCCGAGTGGTTCGATCTTGTTTGTAAGCTTTACCAAAAACCCGTTATCCCAATTGGCGTTTTGCCTCCATCAATAGAAGATAATGAGTTTGATGATTATGAAAATTGGGATTCTATTAAAAACTGGCTAGATAAACAACCGGTTGACTCGGTTGTTTTTGTTGCACTTGGAAGTGAGGCGGTTTTGAGTCAAGTTGAACTCAGTGAGTTGGCTTTAGGGTTAGAGCGTTCGGGTTTGCCTTTCTTTTGGGTAATACGAAAGTCGATCCTCGAGTCAAATCAGCTTCCTGACGGTTTTCTTGAGAGGATCAAGGGTCGGGGAGTGGTTAACATCGGGTGGGTCCCACAAGTGAGGATACTGAGTCACTCATCAATAGGTGGATTCTTGACTCACTGTGGTTGGAACTCAGCTATTGAAGGACTCTCTTTTGGGCGAGTTTTGATATTTTTTCCGGTTATGAACGACCAAGGTTTGAATGTGAGATTATTAAGTGGAAAGAAACTTGGAGTCGAGATTCCT

CGAAATGAGATAGACGGGTCTTTTACGAGTGACTCGGTTGCTGAGTCAATTCAGTTGGCAATAGTGAGTGAAGAAGGAAAGGAATTGAGGGCAAATGCAAGAGAGATGAAAGAAGTATTTGGAGATAAGAGTAAGAATGATCACTATATTGATGATTGTGTAAATTACTTGGTGAAAATGAGGAAACCATAG

MDQEPLHIAMFPWLAMGHLIPFFHLSKILAHKGHQISYISTSRNLERIPKIPPKLSHNIKLISLPFPKVENLPELAESSMDIPYQKSQFLKIAFDLLEPSILTFLQTSKPRVDFIIFDYASHWLPSLASKFNISTAYFSLFTAATQGFLGPPSLLSNTALMRSNPEDFCRVPEWVPFDSDVRYRIHELTKYTEGAVGNESGVLDTVRFLVSIDGCDLVLFRTSYEFEPEWFDLVCKLYQKPVIPIGVLPPSIEDNEFDDYENWDSIKNWLDKQPVDSVVFVALGSEAVLSQVELSELALGLERSGLPFFWVIRKSILESNQLPDGFLERIKGRGVVNIGWVPQVRILSHSSIGGFLTHCGWNSAIEGLSFGRVLIFFPVMNDQGLNVRLLSGKKLGVEIPRNEIDGSFTSDSVAESIQLAIVSEEGKELRANAREMKEVFGDKSKNDHYIDDCVNYLVKMRKP

SrUGT91D1-2

ATGTTCCCATGGCTTGCTTTCGGTCACATTCTCCCATTCTTCGAACTCTCCAAATTCATAACCAAAAACGGTCACAAAGTTTCTTTTCTTTCCCCCACCGGAAACATACAACGTCTCCCTTCTTCTAATCTTTCGCCACTCATGAATCTTGTTAAACTCACACTTCCACGTGTTCAAGAGCTGCCCCAAAATGCATCCGCCACCACGGACCTCCATGCTGATGATGTCCAATATCTCAAACAAGCTTTTGATGGTCTTCAACCGGAGGTCACTCAATTTCTTGAACAAGAGTCGCCGGACTGGATTATTTATGATTTTGCTCCCTATTGGTTGCCGGCGGTAGCCACTAGCCTTGGAATTTCACGAGGTTTTTTCTCAATCTATAACGCATGGACCGTCTCTTTTATCGGATCGTCTTCCGATAACATGATAAACGGTACAGACAATCGGAAAACACCCGACGATTTCTTGACACCGCCGAAGTGGGTTCCGTTTCCAAGCAAAGTATGCTACCGGAAGCATGAGGCCAATTCGATATTTGCTGATAATTTTTCTATTAATTCTTCTGGGGTTTCAGATATATATCGTGCTGGAATGGTTATAAAGGGATCAGATTGTATGTTTATAAGACATTGCCATGAGTTCGAACCCCAATGGCTAACCCTTTTAGAAAAGCTGCATCACCTACCAGTGGTTCCCGTGGGATTATTGCCACCCGAACCACCCACCAGCACCGGAGACCCATGGGTGACAATCAAGAAGTGGCTCGATGGTCAACCAATAGGGCATGTGGTGTACGTGGCATTTGGAAGTGAAGGTACGATGAGCCAAAGCGAGCTGGCTGAGTTAGCTCTGGGCCTCGAGCTCTCCGGGTTGCCATTCTTTTGGGTTCTTAGAAAACCGGTTGGCTCTGGTAACTCGGTGGAGTTGCCAGAGGGGTTCTTGGAACGAACTCGTGACCGTGGGTTGGTGTGGACGAGTTGGGTACCTCAGTTACAAATACTGAGCCATGAGTCAGTGTGTGGTTTCTTGACTCATTCTGGTTGGAGTTCATTTGTGGAAGCGATGATGTTCGGTCACCCTTTGATAATGCTACCGCTTTCGGTGGATCAAGGTCTAAATGCTCGAGTAATGGCGGATAATCAGGTGGGAATTGAGATACCAAGAAATGACGAAGATGGTTCATTCACCAAGGAGTCGGTGGCCAGATCATTGAGGTTGGTTTTAGTCGATGATGAAGGGAAGATCTACAAGGCGAAGGCGATGGAGTTGAGTCAACGATTCGGGGATAGTAAGCCGGAAAATAAGTATATAAACCCTTTTATAGACTATTTGGAACAAAAAGGTCGTGTGGTTGCTATTGAGCATGAGCTTTAA

MFPWLAFGHILPFFELSKFITKNGHKVSFLSPTGNIQRLPSSNLSPLMNLVKLTLPRVQELPQNASATTDLHADDVQYLKQAFDGLQPEVTRFLEQESPDWIIYDFAPYWLPAVATSLGISRGFFSIYNAWTVSFIGSSSDNMINGTDNRKTPDDFLTPPKWVPFPSKVCYRKHEANSIFADNFSINSSGVSDIYRAGMVIKGSDCMFIRHCHEFEPQWLTLLEKLHHLPVVPVGLLPPEPPTSTGDPWVTIKKWLDGQPIGHVVYVAFGSEGTMSQSELAELALGLELSGLPFFWVLRKPVGSGNSVELPEGFLERTRDRGLVWTSWVPQLQILSHESVCGFLTHSGWSSFVEAMMFGHPLIMLPLSVDQGLNARVMADNQVGIEIPRNDEDGSFTKESVARSLRLVLVDDEGKIYKAKAMELSQRFGDSKPENKYINPFIDYLEQKGRVVAIEHEL

SrUGT91D1-4

ATGGACGACCATAAGCAGCTTCATGTTGCGATGTTTCCCATGGCTTGCTTTTCGGTCCACATTCTCCCATTCTTCGAACTCTCCAAATTCATAACCAAAAACGGTCACAAAGTTTCTTTTCTTTCCCCCACCGGAAACATACAACGTCTCCCTTCTTCTAATCTTTCGCCACTCATGAATCTTGTTAAACTCACACTTCCACGTGTTCAAGAGCTGCCCCAAAATGCATCCGCCACCACGGACCTCCATGCTGATGATGTCCAATATCTCAAACAAGCTTTTGATGGTCTTCAACCGGAGGTCACTCGATTTCTTGAACAAGAGTCGCCGGACTGGATTATTTATGATTTTACTCCCTATTGGTTGCCGGCGGTAGCCACTAGCCTTGGAATTTCACGAGGTTTTTTCTCAATTTTTAACGCATGGACCGTCTCTTTTTTCGGATCTTCTCCCGATGACATCATAAACGGTACAGACGATCGGAAAACAGCCGACGATTTCCTGACACCGCCGAAGTGGTTTCCGTTCCCAAGTAAAGTATGCTACCGGAAGCATGAGGCCAATTTGATATTTGCTGATAATATTTCTGTTAATTCTTCTGGTGTATCAGATTTATATCGTTTAGGAATGGTTATAAAGGGATCAGATTGTATGTTTATAAGACATTGCCATGAGTTCGAACCCCAATGGCTAACCCTTTTAGAAAAGCTGCATCAGCTACCGGTGGTTCCCGTGGGATTATTGCCACCCGAACCACCCACCAGCACCGGAGACCCATGGGTGACAATCAAGAAGTGGCTCGATGGTCAACCAATAGGGCATGTGGTGTACGTGGCATTTGGAAGTGAAGGTACGATGAGCCAAAGCGAGCTGGCTGAGTTAGCTCTGGGTCTCGAGCTCTCTGGGTTGCCATTCTTTTGGGTTCTTAGAAAACCGGTTGGCTCTGGTAACTCGGTGGAGTTGCCAGAGGGGTTCTTGGAACGAACTCGTGACCGTGGGTTGGTGTGGACGAGTTGGGTACCTCAGTTACAAATACTGAGCCATGAGTCGGTGTGTGGTTTCTTGACTCATTCTGGTTGGAGTTCATTTGTGGAAGCGATGATGTTCGGTCACCCTTTGATAATGCTACCGCTTTCGGTGGATCAAGGTCTAAATGCTCGAGTAATGGCGGATAATCAGGTGGGAATTGAGATACCAAGAAATGACGAAGATGGTTCATTCACCAAGGAGTCGGTGGCCAGATCATTGAGGTTGGTTTTAGTCGATGATGAAGGGAAGATCTACAAGGCGAAGGCGATGGAGTTGAGTCAACGATTCGGGGATAGTAAGCCGGAAAATAAGTATATAAACCCTTTTATAGACTATTTGGAACAAAAAGGTCGTGTGGTTGCTATTGAGCATGAGCTTTGA

MDDHKQLHVAMFPMACFSVHILPFFELSKFITKNGHKVSFLSPTGNIQRLPSSNLSPLMNLVKLTLPRVQELPQNASATTDLHADDVQYLKQAFDGLQPEVTRFLEQESPDWIIYDFTPYWLPAVATSLGISRGFFSIFNAWTVSFFGSSPDDIINGTDDRKTADDFLTPPKWFPFPSKVCYRKHEANLIFADNISVNSSGVSDLYRLGMVIKGSDCMFIRHCHEFEPQWLTLLEKLHQLPVVPVGLLPPEPPTSTGDPWVTIKKWLDGQPIGHVVYVAFGSEGTMSQSELAELALGLELSGLPFFWVLRKPVGSGNSVELPEGFLERTRDRGLVWTSWVPQLQILSHESVCGFLTHSGWSSFVEAMMFGHPLIMLPLSVDQGLNARVMADNQVGIEIPRNDEDGSFTKESVARSLRLVLVDDEGKIYKAKAMELSQRFGDSKPENKYINPFIDYLEQKGRVVAIEHEL

SrUGT92B1

ATGGCGGATAACAACATCATCATGTTCCCTTTCATGGCACAAGGCCATATCATCCCTTTTCTATCTTTATCCCTCCAATTGGAACAAAAGGGCTACCAGATCACCTTCATCAACACCCCTCTCAATATCGCCAATCTCCGCCGTGCTCTTCCGCCGTCCTCCGCCATCCGCCTCTTTGAAATCCCCTTCAACCCCTCCGACTTCGGTCTCCCTGCTAACGCCGAGAACACCGATTCACTCTCTCCGAACAAAATTTACGAACTCCTCGTCGCCTCCACCTCACTCAAACCCGCATTCAGAAACATAATCAACGACCTCGTTTCCGACGGAAGCTCCGCCGCTGTGTGTGGTGGCGGACTTTTCTTCGGGTGGTCGGCGGCCGTGTCGCATGAATTCGGAATCTTTCATGTGATCTTCAGTGGATCCGGTGGGTTTGGATTAGCGTGTTACTTCTCTTCTTGGATCCATTTACCTCACAAAAATTCCGATTGCGGTGAGTTCACGTTGCCGGATTTTCCAGAAGCCGGTAAATTACAGGTGACCCAGTTGACCCCAAGTCTTATAGCAGCGACCGGCGAAGACCCTTGGTCGGAATTCCAAAAAAAGAATCTTCCGGCATGGGGCGATGCAGATGGGTTCTTGTTCAACACAATTGAAAAGCTAGATAAAGTTGGTCTATCGTATTTCAGAAAAAAATTCCGGCGACCGGTGTGGGCAATTGGGCCGATAAACTTATCATTAACTGGCGGAGCTCCTACCAAGAAAAACTATTCCGGCAAAGAAGAATTGGTTCAATTTCTGAACTCAAAACCAGCATCCTCTGTTTTGTACATTTCATTCGGATCACAAAACACAATAACGGCTTCCCAGATGATGCAATTGGCAAAGGCATTAGATAAAAGCAACAAAAGCTTCATCTGGGTTGTCCGGCCGCCGTTAGGATTCGACATAAACGCCGAGTTCCGAGCAGATGAATGGTTGCCGGAAAACTTCACAACACGAATTAAAGACGAAAACAGAGGTCTAATCATCGAAAAATGGGCACCACAGCTTGAAATACTGTCACATGAATCTGTAGGTGGGTTTATGACTCACTGTGGGTGGAATTCGGTGCTTGAATCGGTCAGCCGTGGTGTGCCGATGCTCGGGTGGCCGATGGCGGCGGAGCAGTTTTATAACGCGAAGATGATGGTGGAGATTGCAGAGGTGTGCGTGGAGGTGGCGCGTGGGACTAATTTTGATGTCCGTTTTGAGGATTTGAGGGAGAAGATAGAGGAAGTGATGAGTGAAGATGGAAGAGGGAAAGAGATGAGGAAGAAAGCGTTTGAGATTAAGATGATGATTGAAGAAGCAACGAGAGATGAAGAAGGTTTTAAAGGTTCTTCTGTGGAAGCCATGGAAGAGTTCCTTCAAGCTCCATTGAAGAAGATGAACAATAACACCACCAATGCTTGA

MADNNIIMFPFMAQGHIIPFLSLSLQLEQKGYQITFINTPLNIANLRRALPPSSAIRLFEIPFNPSDFGLPANAENTDSLSPNKIYELLVASTSLKPAFRNIINDLVSDGSSAAVCGGGLFFGWSAAVSHEFGIFHVIFSGSGGFGLACYFSSWIHLPHKNSDCGEFTLPDFPEAGKLQVTQLTPSLIAATGEDPWSEFQKKNLPAWGDADGFLFNTIEKLDKVGLSYFRKKFRRPVWAIGPINLSLTGGAPTKKNYSGKEELVQFLNSKPASSVLYISFGSQNTITASQMMQLAKALDKSNKSFIWVVRPPLGFDINAEFRADEWLPENFTTRIKDENRGLIIEKWAPQLEILSHESVGGFMTHCGWNSVLESVSRGVPMLGWPMAAEQFYNAKMMVEIAEVCVEVARGTNFDVRFEDLREKIEEVMSEDGRGKEMRKKAFEIKMMIEEATRDEEGFKGSSVEAMEEFLQAPLKKMNNNTTNA

SrUGT94A1-1

ATGAATCAAGAATCACTTCCACCTCATGTTCTAATATTTCCATTGCCATTACAAGGTCCAGTGAATTCCATGCTCAAGTTAGCCGAGCTTCTATGTCTATCTGGTCTCCACATCACCTTTCTTGTTACTGATCATATCCACAATCGACTAATCAAATATTCCAATATTGAATCGCGCTTTAATGGTTACCCTGGTTTTCGTCTTGAAACCATATCTGATGGTCTTCCAGAATACCATCCTCGATCTGGACCTGTGCTTATGGAAATGTTTGACTCTTTAAAAGTCAAAACCAAGATTCTTCTTAAAGATCTTTTGACATCTGGTAAACTGAATTCAGATTCACGGAGACCTGTAACTTGTATAATTGGAGATGGAATAATGGGGTTTACATGTGATGTTGCTAATGATGTTGGATTACCGATTATATATGTTCGTACAATCAGTGCTTGTTGCTTGTGGGTTTTCTTTTGTCTTCCGAAGCTCATTGAATCGGGTGAAATCCCATTTGCAGGTAACGACTTGGATACACCAATAAAGAGTATACCGGGAATGGAAGGGTTTTTTAGGCGTCGTGATCTTCCAATGTTTTGTCGTTCTGGTAGTTTGTCAGACCCCAACTTGAACCTCTATCTACCTGAAATTACCGAAAACTCAAGAGCCCATGGGCTTATACTCAACACATTTGACGATTTAGAGGGCCCAATACTAGCCCAAATACGCGCATTTTGTCCAAACCTATACACGATCGGCCCACTTCATTCTCATCTTAAATACAAGCTATTAGATCAATCATCGTCATCACCACCTTCTTCAAATAGTCTATGGAAAGAAGATATGAGTTGCATCGCATGGTTGGACTCACAACCACCAAAATCGGTTATTTATGTTAGTTTCGGGAGTCTTGCAGTAATGACTAAGGATCAATACATGGAGTTTTGGCATGGGTTGGTGAATAGTGGGTCCCGTTTCTTGTGGGTCATACGGCCTGACTCAGTTACCAGTGATCCAACTGACGTTTCGTCAGAACTTTTGAAAGGTACAAAGGAGAGAGGGTACATAGTCGAATGGGCCCCACAAGAGGAGGTATTGGCCCATCGGGCCGTGGGTGGGTTTTTAACGCACAGTGGATGGAATTCGACTTTGGAGAGTGTGATTGAAGGTGTGCCGATGATCTGTTGGCCGTATTTTTTAGACCAACAAGTGAATAGTAGGTATGTGGGGGAAGTGTGGAAGTTGGGGTTGGATATGAAAGATACTTGTGATAGAGTGATTGTAGAGAAAACTGTGAGAGATTTGATGGAAGATAGGAAAGATGAGTTTAGAAAATCGGCGGATGAGATGGCGAATTATGCAAAAGAATGCTTGATGAAAGGTGGATCATCTTATTGTAATTTAGAGCGTTTGGTGAAGGATATCAAAGCTATGTAA

MNQESLPPHVLIFPLPLQGPVNSMLKLAELLCLSGLHITFLVTDHIHNRLIKYSNIESRFNGYPGFRLETISDGLPEYHPRSGPVLMEMFDSLKVKTKILLKDLLTSGKLNSDSRRPVTCIIGDGIMGFTCDVANDVGLPIIYVRTISACCLWVFFCLPKLIESGEIPFAGNDLDTPIKSIPGMEGFFRRRDLPMFCRSGSLSDPNLNLYLPEITENSRAHGLILNTFDDLEGPILAQIRAFCPNLYTIGPLHSHLKYKLLDQSSSSPPSSNSLWKEDMSCIAWLDSQPPKSVIYVSFGSLAVMTKDQYMEFWHGLVNSGSRFLWVIRPDSVTSDPTDVSSELLKGTKERGYIVEWAPQEEVLAHRAVGGFLTHSGWNSTLESVIEGVPMICWPYFLDQQVNSRYVGEVWKLGLDMKDTCDRVIVEKTVRDLMEDRKDEFRKSADEMANYAKECLMKGGSSYCNLERLVKDIKAM

SrUGT94A1-2

ATGAATCAAGAATCACTTCCACCTCATGTTCTAATATTTCCATTGCCATTACAAGGTCCAGTGAATTCCATGCTCAAGTTAGCCGAGCTTCTATGTCTATCTAGTCTCCACATCACCTTTCTTGTTACTGATCATATCCACAATCGACTAATCAAATATTCCAATATTGAATCGCGCTTTAATGGTTACCCTGGTTTTCGTCTTGAAACCATATCTGATGGTCTTCCAGAAAACCATCCTCGATCTGGACCTGTGCTTATGGAAATGTTTGACTCTTTAAAAGTCAAAACCAAGATTCTTCTTAAAGATCTTTTGACATCTGGTAAACTGAATTCAGATTCACGGAGACCTGTAACTTGTATAATTGGAGATGGAATAATGGGGTTTACATGTGATGTTGCTAATGATGTTGGATTACCGATTATATATGTTCGTACAATCAGTGCTTGTTGCTTGTGGGTTTTCTTTTGTCTTCCGAAGCTCATTGAATCGGGTGAAATCCCATTTGCAGGTAACGACTTGGATACACCAATAAAGAGTATACCGGGAATGGAAGGGTTTTTTAGGCGTCGTGATCTTCCAATGTTTTGTCGTTCTGGTAGTTTGTCAGACCCCAACTTGAACCTCTATCTACCTGAAATTACCGAAAACTCAAGAGCCCATGGGCTTATACTCAACACATTTGACGATTTAGAGGGCCCAATACTAGCCCAAATAAGCGCATTTTGTCCAAACCTATACACGATCGGCCCACTTCATTCTCATCTTAAATACAAGCTATTAGATCAATCATCGTCATCACCACCTTCTTCAAATAGTCTATGGAAAGAAGATATGAGTTGCATCGCATGGTTGGACTCACAACCACCAAAATCGGTTATTTATGTTAGTTTCGGGAGTCTTGCGGTGATGACAAAGGATCAATACATGGAGTTTTGGCATGGGTTGGTGAATAGTGGGTCCCGTTTCTTGTGGGTCATACGGCCTGACTCAGTTACCAGTGATCCAACTGACGTTTCGTCAGAACTTTTGAAAGGTACAAAGGAGAGAGGGTACATAGTCGAATGGGCCCCACAAGAGGAGGTATTGGCCCATTGGGCCGTGGGTGGGTTTTTAACGCACAGTGGATGGAATTCGACGTTGGAGAGTGTGATTGAAGGTGTGCCGATGATCTGTTGGCCGTATTTTTTAGACCAACAAGTGAATAGTAGGTATGTGGGGGAAGTGTGGAAGTTGGGGTTGGATATGAAAGATACTTGTGATAGAGTGATTGTAGAGAAAACTGTGAGAGATTTGATGGAAGATAGGAAAGATGAGTTTAGAAAATCGGCGGATGAGATGGCGAATTATGCAAAAGAATGCTTGATGAAAGGTGGATCATCTTATTGTAATTTAGAGCGTTTGGTTAAGGATATCAAAGCTATGTAA

MNQESLPPHVLIFPLPLQGPVNSMLKLAELLCLSSLHITFLVTDHIHNRLIKYSNIESRFNGYPGFRLETISDGLPENHPRSGPVLMEMFDSLKVKTKILLKDLLTSGKLNSDSRRPVTCIIGDGIMGFTCDVANDVGLPIIYVRTISACCLWVFFCLPKLIESGEIPFAGNDLDTPIKSIPGMEGFFRRRDLPMFCRSGSLSDPNLNLYLPEITENSRAHGLILNTFDDLEGPILAQISAFCPNLYTIGPLHSHLKYKLLDQSSSSPPSSNSLWKEDMSCIAWLDSQPPKSVIYVSFGSLAVMTKDQYMEFWHGLVNSGSRFLWVIRPDSVTSDPTDVSSELLKGTKERGYIVEWAPQEEVLAHWAVGGFLTHSGWNSTLESVIEGVPMICWPYFLDQQVNSRYVGEVWKLGLDMKDTCDRVIVEKTVRDLMEDRKDEFRKSADEMANYAKECLMKGGSSYCNLERLVKDIKAM

SrUGT94B1

ATGGATCTACAACCACCACATGTTCTTATCTTTCCGTTTCCGGCTCAAGGCCACGTCAACGCCATGTTAAAACTCACCGAGCTCCTTCTGCCAGTCGGTCTCCACATCACCTTCTTAATATCCTCCAAAGACTACCGCAGTCTCTGCAGTTATGCCACCATCCACTCGCGCCTTAACTCCAAACCAGGTTTCCGGTTCCATGTTATCGAGGGTCTCTATGAAGGAAATATGGACACCGGTGAAAAGATCAGTCTGATGGTTGATAGTTTGGCTCAAGTAGCAACACCGTTGCTCAGGAAATTGATTCTTGATTTTCCGGTGACTTGTGTTATTGACGATGGAATTAATGGGTTTTCACTTGATGCGGTTGAGGGTACCGGAATTCCGGTCATTTTTTTCCGGACGATTAGTGCTTGTGCTTTCTGGGCTTACTTTAGCATCCCGGAACTCGTAAGCTCCGGTGAACTTCCTTTTACAGGCACAAACATGGATGAACGAATAGTGAGTGTGAAAGGTATGGAAGGATTCCTTCGCCGGCGTGATCTTCCAAGCTTTTGCCGTTCCGACATAAGCAACTACACTTTCCAGCAGGTCAGCAGTAAAACACGTCAGACGGTAAATGCTCATGCACTCATTCTTAACACCTTTGATGACCTTGAAGGGCCTATTGTCTCACAGATTCAAAACCATTGCACCAATATCTACACAATCGGGCCACTTCATGCACATCTAAAATCTCGATCCTTGTCTGTATCCACATCCTCAAATAGTTTTTTCAAGGAAGACAAGACTTGCATAGGCTGGCTTGATCAACAACCACCAAAATCTGTGTTGTACGTGAGTTTTGGAAGTTTAGCCACGTTAACAAGGGACCAACTTCTCGAGTTTTGGTATGGTTTAGTCAATAGCAATAAACTATTTTTGTGGGTCATTCGCGAGGATCTAGTTATGAGCAAAGATGATGAAAATAAAATACCATTTGAGGTAGAGAAAGGTACCAAAGAAAGAGGATATCTGGTTGGGTGGGCTCCACAAGAAGACGTGCTAGCCCACCCAGCCGTAGGTGCCTTTCTAACACATAATGGGTGGAACTCGACTTTGGAGAGCATTGTCGCAGGTGTGCCAATGGTGAGTTGGGCATTTTTTGCTGATCAACAAATAAATAGTAGATTTATCGATGCAGTTTGGAAACTAGGGCTAGACATGAAGGACACATGTGATCGAACCACGGTAGAGAAGATTGTAAATGAAGTAATGGAGATTTGGAAGGAGGAGTTTATAGAATCAGCCAATCATATGGCCAAATTAGCTATGAAGTCTGTGAACAAAGGTGGATCTTCATATAGTAATTTGGATCGTCTGATCGAAGACATTAAAAAAATGGGTCTTAACAACATAAATTAG

MDLQPPHVLIFPFPAQGHVNAMLKLTELLLPVGLHITFLISSKDYRSLCYATIHSRLNSKPGFRFHVIEGLYEGNMDTGEKISLMVDSLAQVATPLLRKLILDFPVTCVIDDGINGFSLDAVEGTGIPVIFFRTISACAFWAYFSIPELVSSGELPFTGTNMDERIVSVKGMEGFLRRRDLPSFCRSDISNYTFQQVSSKTRQTVNAHALILNTFDDLEGPIVSQIQNHCTNIYTIGPLHAHLKSRSLSVSTSSNSFFKEDKTCIGWLDQQPPKSVLYVSFGSLATLTRDQLLEFWYGLVNSNKLFLWVIREDLVMSKDDENKIPFEVEKGTKERGYLVGWAPQEDVLAHPAVGAFLTHNGWNSTLESIVAGVPMVSWAFFADQQINSRFIDAVWKLGLDMKDTCDRTTVEKIVNEVMEIWKEEFIESANHMAKLAMKSVNKGGSSYSNLDRLIEDIKKMGLNNIN

SrUGT94C1

ATGGCTCAAACTCACCAACAACCAAACAACCCTAAAACCAAGCTCGAACCACATGTGCTTATATTTCCCATACCATTTCAAGGTCCAGTCAATTGTGCACTCAAGTTAGCCGAGCTCCTATGTCTTTCCGGCATCCACGTCACCTTCCTCAACACCGAACACATCCACCGACCCCTCATCCACCACACCAACGTCCTCTCCCGGTTCAACCGCTACCCGAACTTCCGGTTTGAGACTCTCCCTGATGGTCTCCAGCATGAAAAACCGGTTTCTGGAGACGGGTTTATGGAGGTTATGGAGGCTGTAGATGCGGTGAGTAAACCTCTTTTCCGGGAGATGATGGTTTCCGGTAAGATGAGTCGGAGATCGGAGCGGCCGGTGACGGTGATGATACCGGATGCATGTTTTAGTTTTGCGGTGGATATAGCGACGGAGGCATCGATTCCGGTGATATGTTTCGAGACTGTAAGTCCATGTTGTTTGTGGACTTCATATTTGAATCTTCCAACGCTTATTGAAGCAGGAGATGTCCCCTTTAAAGGAGATGATCTAGACCAATTCATAACAAGTGTGCCAGGAACAGAGCATATCATCCGACGCCGCGATCTTGCTAGCTTTTGTCGAACCGACGACTTGTCGATCCCCGTAATAGATCTCATCGTCAAAGAAGCTCACACGGTTCCTCGAGCTCAAGGTCTCATACTCAACACGTTTGAAGAGTTGGATGCTCTCATACTCTCTCACATGCGGAAGCTTTGTCCAAATATTTACACCATAGGCCCGCTTCATACGTTCCACAAAGCTCAACTCATGGCTAACACAACAAAACCATCGCAAGAAACCACATTTTCCAATAGTGTTTGGAAGGAAGATAGATCTTGCATGGCGTGGCTCGATGAGCACGAACCACAAACCGTCATTTATGTTAGCATAGGGAGTCTTGCGACCATGACGGTTGAACAACTTATTGAGATATGGTATGGTGTGGTTAATAGTGGGAAACCGTTTTTGTGGGTGAGACGACCTGGTTCGATCACCGGTGGGTATGATGAGTCTTTGGTTCCCCCAGAGCTACTAGCGCGTACGAGGGAGATAGGGTGTATAGTAGAATGGGCTCCACAAGAAGATGTACTCGCCCATCCAGCCATTGGCGGGTTTTTGACTCATAGTGGATGGAACTCGACTATGGAGAGTATAGCCGCGGGTGTCCCCATGGTTTGTTGGCCATATTTTGTGGACCAACAAGTGAATAGTCGATTTGTGGGCGAGGTATGGAAAATTGGAGTAGACATGAAAGATACATGTGATCGGTTGATTGTTGAAAAGGCAGTGAGGGATATTATGGACTTGAAACCGAATGAGTTTACCCAATCTGCCAATGCTTGGGAAAATTCGGCTAAAGAATCGATCACGAAGACCGGTTCATCGTCTATAAGTTTGAGTCGGTTGATTGATGATATTTTAGCAATGAGCTCGTCCCAATCCTGA

MAQTHQQPNNPKTKLEPHVLIFPIPFQGPVNCALKLAELLCLSGIHVTFLNTEHIHRPLIHHTNVLSRFNRYPNFRFETLPDGLQHEKPVSGDGFMEVMEAVDAVSKPLFREMMVSGKMSRRSERPVTVMIPDACFSFAVDIATEASIPVICFETVSPCCLWTSYLNLPTLIEAGDVPFKGDDLDQFITSVPGTEHIIRRRDLASFCRTDDLSIPVIDLIVKEAHTVPRAQGLILNTFEELDALILSHMRKLCPNIYTIGPLHTFHKAQLMANTTKPSQETTFSNSVWKEDRSCMAWLDEHEPQTVIYVSIGSLATMTVEQLIEIWYGVVNSGKPFLWVRRPGSITGGYDESLVPPELLARTREIGCIVEWAPQEDVLAHPAIGGFLTHSGWNSTMESIAAGVPMVCWPYFVDQQVNSRFVGEVWKIGVDMKDTCDRLIVEKAVRDIMDLKPNEFTQSANAWENSAKESITKTGSSSISLSRLIDDILAMSSSQS

SrUGT96A1

ATGGATCAAAACCAACAAACATGTGTCGTGATGGTTCCCTTTATAGCACACGGCCATCTCAACCAGCTCATCCACCTCTCCCACCTAATCTCCACCTACGACCTACCGGTCCACTTTGTGTGCGCCTCAGGTCACACCCGCCAAGCCAAAATACGTGTCCATGGTTGGGACCCTCACTCGGACCCTAACATCCGGTTCCATGAGTTCCCAATACCATCTTTCCCTAACGATGCACCCAACCCTAATGGCCCAACACGCTTCCCTAACCACCTCATGCCGGCGTTCAAAGCCATCATGCACATCCAAGAACCCTTTGTTAAACTACTTTCCGATCTCTCGGTTACAATGAAAAGGGTTGTGATCATTCATGATTACTTGATGAGCTCCATTGTTCAAGACTTCGTTTCGTTCCCTAACGTTGAAGCTTACATGTTTCAAAGTTGCTCTGCTTTTACTGCCTTTTGGTTCCATTGGGAGGAAACACAAGCGTTAAAGTTGGACGATGAAGCCGAGTCGTTATGGGCAAAAATCCCACCGTTAGAAGGGTGTTTGAGTAGTGAGTTTGTTGAGTTACTTGACTCGGAAAACACGTCATTCAAGAAGATCAGCTCGGGAACACTTTATGACACGAGCAAAGTGTTTGAAGAGAAGTATTTAGAGTTACTTAAACATGAAGAGGTCACCTCTGGGACTGTCAAGAATTGGGCTATTGGCCCGTTTAACCCGGTTAGCATAACCGGTCATAAGAACTCGAGTACCGAATCGATCAAGCTATTCGATTGGTTAAACAAACAAGAACCAAATTCTGTTATTTATGTGTCGTTTGGTACCACGGTCACATTTACAAACGAAGAAATAAAAGAAATCGCAATCGGGTTGGAAGAAAGCGGTCAGAAGTTTATATGGGTGGTGAGGGAAGCGGATAAAGCTAACATTTTCGACGGAAAAGATGACCAGAGAGTTGCATTACCGGAGGGTTATGAAGAGAGGGTGGAAACCAGTGGGGTAGGGGTGGTGGTGAGGGGTTGGGCACCGCAGCTTGAGATACTGAACCACCAGTCTACAGGTGGGTTCATGAGTCACTGTGGTTGGAACTCATGCATGGAAGGGATCACAATGGGGGTTCCGATGGCTGCATGGCCCATGCATTCCGATCAACCGAGGAACGCCGTGTTGATTACCGAGGTGCTTGGAACCGCGATATACGCGAGAGAATGGGAGCGGCGAGACGAAAAGCTGGCGGCCGCGGTGGTTTCAGCGGCGGTTAGACGGTTGATGGCGTCCGAGGAGGGGTGTGTGGTGAGAAAGAAGGCGGAGGAACTTGGTGGTGCGGTCCGGCGATCGGTGGAAGAAGGTGGCGTTATGCGCAAAGAGTTGGATGAGTTTGTTGGTCATATCACCAGACAGTGA

MDQNQQTCVVMVPFIAHGHLNQLIHLSHLISTYDLPVHFVCASGHTRQAKIRVHGWDPHSDPNIRFHEFPIPSFPNDAPNPNGPTRFPNHLMPAFKAIMHIQEPFVKLLSDLSVTMKRVVIIHDYLMSSIVQDFVSFPNVEAYMFQSCSAFTAFWFHWEETQALKLDDEAESLWAKIPPLEGCLSSEFVELLDSENTSFKKISSGTLYDTSKVFEEKYLELLKHEEVTSGTVKNWAIGPFNPVSITGHKNSSTESIKLFDWLNKQEPNSVIYVSFGTTVTFTNEEIKEIAIGLEESGQKFIWVVREADKANIFDGKDDQRVALPEGYEERVETSGVGVVVRGWAPQLEILNHQSTGGFMSHCGWNSCMEGITMGVPMAAWPMHSDQPRNAVLITEVLGTAIYAREWERRDEKLAAAVVSAAVRRLMASEEGCVVRKKAEELGGAVRRSVEEGGVMRKELDEFVGHITRQ

SrUGT96B1

ATGACCGGCGACGACACCACTTTTCCGGCGACCGACGTGGTGGTAGTGACGGTGCCATTCGTGGCCCACGGCCACCTTACCCAACTTCTCCACCTCTCCCACCTCATCTCCGCCTACAACATCCCCGTAAACTTCATCACCACCACCGATTGTCTCCGTCAACTCCGCTCCCGCCACCGCACCTCCGCCGCCGGCATCGAATTTCACGACTTTCCGGTCCCGCCGTTCACCACCCCTCCACCGGACCCATCCAACCCGTTCCCTACCCACCTCCAACCGTCGTTCGACGCCACCCTCCATCTCCGGCAACCCACCGGCGACCTCATACGTTCACTGTCGCAAAAAGTCAAACGACGAGTTGTTGTAATTCACGACGTTCTCATGTCATACGTCGTTCAAGACGTGAAATCAATACCAAACGCTGAAACTTATGTTTTCCAGCCGCCACCGGCAATCTACAGAGCCGTCGGCCAGTGGGAGAGAACTGGCGGACCGTTACCGGTCGAACCGGAATTGATGAACCGGCTTCCTTCTCGAGACGGGACTTCAAGTCCAGAGTTTTTGGAGTTCTTGAAATATCAGAAATCTCACATGAATTTTCACGTCGGAGAATTATACGATTCGTCAAGAATAATCGAAGGCAAATTTATTGAATATCTAGAAAAACAAAATGTTAACGGGAAAATAAAGATATGGGCGGTCGGACCGGTTAACCCGGTCCAAATAGCATCTGATGTGACGGATCCAACAAACCGTCACAAATGCTTGAAATGGCTCGACAAGCAACCAGCAAACTCGGTCGTTTATGTGTCTTTCGGGACGACAACCACCTTTAGCGATGATCAAATTACCGAATTAGCCCTCGGGTTAGAGAGAAGTGGACAGAGGTTTGTTTGGGTGGTTCGAGTCGCTGACACGGTTGGTCCGTGTGGGTTCGAGGATAGGAAGGTTAAGTTGCCGGACGGGTTCGAGGAGAGGGTGAAAGAAAGGGGTTTGGTTGTGCGGTCGTGGGCCCCGCAGTCCGAGATTTTGGGACATTTTGCGACGGGCGGGTTTATGAGTCACTGTGGATGGAACTCAAGCATGGAGAGTATATCATTTGGGGTGCCAATTGTCGCGTGGCCGATGCACTCGGATCAACCGACGAACGCGTTTTTGGTGACGGATGTTCTTAAGATTGGGGTCGCAGTGAAGAGTTGGAATCGGAGAGATGAGTTGGTGACGGCGGATGTGGTGGCGGAGGTTGTTAGGATGCTGATGGGTTCGGATGAAGGGGAGGAGATGCGGCGGAGGGCGGTGAAATTGGGT

MTGDDTTFPATDVVVVTVPFVAHGHLTQLLHLSHLISAYNIPVNFITTTDCLRQLRSRHRTSAAGIEFHDFPVPPFTTPPPDPSNPFPTHLQPSFDATLHLRQPTGDLIRSLSQKVKRRVVVIHDVLMSYVVQDVKSIPNAETYVFQPPPAIYRAVGQWERTGGPLPVEPELMNRLPSRDGTSSPEFLEFLKYQKSHMNFHVGELYDSSRIIEGKFIEYLEKQNVNGKIKIWAVGPVNPVQIASDVTDPTNRHKCLKWLDKQPANSVVYVSFGTTTTFSDDQITELALGLERSGQRFVWVVRVADTVGPCGFEDRKVKLPDGFEERVKERGLVVRSWAPQSEILGHFATGGFMSHCGWNSSMESISFGVPIVAWPMHSDQPTNAFLVTDVLKIGVAVKSWNRRDELVTADVVAEVVRMLMGSDEGEEMRRRAVKLG

Additional file 7

The nucleotide sequences of the five *SrUGTs,* which cloned and differed with transcriptome in this study

SrUGT73G2

ATGGCTTTGGAATCAGTCAACCAGCTTCACTTCCTCCTGATCCCCTTTCTAGCTCCTGGTCACACCATCCCCATGATCCACATGGCCAAATTGCTCGCACAACGACCAAATGTGATGGTCACCATCGTCACCACACCCGTAAACGCGATTCGATATGGTTCTACGCTTCAAGAACACATCGAATCCGGACTCCCGGTGTGTTTTCTTGAACTTCCATTTCCGGCGACCGAGAATGGACTTCCGGAGGGATGCGAAAGTGTAGATGCTCTACATTGTCTAGAATTACTTCCAAACTTTTCGGCTGCAGTTGACACGTTACAAGAACGACTCGAGCAACGGTTCGAATCGATTAACCCACGTCCGAACTGTATTATATCTGATAAATACATGGTCTGGAGTGATTATACAGCAGCAAAGTATGAGATTCCCAGGATCATATTCGATGGGATGAGTTGTTTCAAACAACTATCTACACATCATTTGTATGCATCTAAGGTGTTCGATGATATGCCTGAGTCAGAACCATTTGTTCTCCCTGGATTGCCTGACAAGATCGAGATCACCCGAGCTCAACTGCCAGCAGAGTTCAATCATAGCCGTGGTGTAATGCGTGAGCAAATTGAACGAGTGAGAGAAACCGAGTCGAGAGCTTACGGAATGGTGATCAATAGTTTTGAGGAGTTGGAGCAAGAGTATGTTAAGGAACTTAAGAAGTTTAAAGGCGGTAAGATTTGGTGTTTAGGACCGTTATCATTATCTAACAATCATGATTCGAGTACATCTATTGATGATCAACGTTACTTGAAATGGCTCGATTCTAAAGAACCAGGATCGGTTGTGTATGCCTGCTTCGGTAGCAGTAGTCAAGTCACGCCCCCACAACTCATCGAGCTTGGGTTAGCATTGGAAGCATCCAAATCCCCGTTCATATGGGTGATTCGAGCCGGTGACAAAGTTAAAGAGGTCGAGAAATGGTTAATAGAAAGTGAGTTTGAAACTCGAGTAAAAGACAGAGGTCTTGTAGTCAGAGACTGGGCACCACAAATCTTAATCTTGTCCCACCGTTCGGTTGGAGGGTTCTTGACACACTGCGGTTGGAATTCAGTGTTGGAAGGGGTTTCGGCTGGTGTCCCTATGATCACGTGGCCTTTGTTTGCAGAACAATTCTTGAACGAGAAGTCGATAGTTCAAGTTTTGGGTGTCGGTGTTAGTGTTGGTGCTCCCGGTGTGGTGCACTGGGGCCAAGAAGACGAATTTGGGGTCACCGCGAAAAGCGAGCAGGTGAAAACAGCTATAGAAACAGTAATGGATGTCGGATCCGAAGGAAATGAGAGAAGAAAGAAGGCGAAATCACTTGCAATGGTAGCAAAAAAAAGCCATTGAAGAAGGGGGATCTTCTCACTATAACTTGATGTTACTAATACAAGATATATTGGAACATATAAATGCTAGAACCCATAAGCCAGAAACTACTTATTGTAGCTAA

SrUGT85C3-1

ATGGATGCAGTGGTCGAAACAGAAAAGAAGAAACCACACGTCATCTGTATGCCGTTTCCAGATCTAAGCCACATAAAAGCCATGCTCAAACTAGCCGAGCTTCTCTACCACAAAGGACTACAGATAACCTTCATCAACACCGATTTCGTCCACAACCGGTTTCTTGAATCAGGAGGACCACACTGTTTAGACGGTCCACCTGGTTTCCGGTTTGAAACCATTCCAGATGGTGTTACTCGCAGATCGGAAGCTAGCATCCACAACACCAGAGAACTACTCAAGTCCGTCGAAACCATCTTCTTGGATCGTTTCATTGACCTTGTAACCAAACTTCCGGATCCTCCGACTTGTATTATCTGTGATGGTTTCTTGTCGGTTTTCACAATTGACGCTGCAAAAAAGCTTGGAATCCCGATTATGATGTATTGGACACTTGCTGCCTGTGGCTTCATGGGGTTTTATCAAATGCATTCTCTCATTGAGAAAGGATTTGCACCGCTTAAAGATGAAAGTTATTTGACAAATGGGTATTTAGACACCGTCGTTGATTGGGTTCCGGGAATGGAAAGCATCCGTCTTAAGGAGTTCCCATTGGTTTGGAACACTGACTTGAATGATAAACTTCTAACATTCTGCAAGGAAGCTCCCCAAAGGTGTCACTCGGTTTCAAATCATATTTTCCACACGTTTGATGAGTTAGAGCCTAGTGTTATCAAAGCTTTGTCATCTATATATTCTCGCGTTTACGCCATCGGCCCACTACAACTACTTCTTGATCAGATACCTGAAGAAAAAAAGCATACTGGAATTTCAGGTTTGAATGGATACAGTTTTGTGAAAGAAGAACCCGAGTGTTTTAAGTGGCTTCAATCTAAGGAACCATATTCTGTCATTTATGTAAATTTTGGGAGTTCAACATTAATGTCTTTAGAAGACTTGATAGAATTTGGTTGGGGACTTGTTAATAGCAACCACTATTTCCTTTGGATCATCCGATCTAACTTGATAAATGGAGAATCTGCAGTTTTGCCTCTTGAATTAGACGAACATATAGAAAAGAGAGGCTTTATTGCAAGCTGGTGTTCACAAGAAAAGGTCTTGAACCACCCTTCCATTGGAGGGTTCTTGACTCATTGTGGGTGGGGATCCACAATCGAGAGCTTGTCAGCTGGGGTGCCAATGATATGTTGGCCTTTTTTTTGGGACCAACCGACCAACTGTAGGTATATATGCAATGAATGGGAAGTTGGACTTGAGATGGGGAATAAAGTGAAACGAGATGAAGTCAAGAGACTTGTACAAGAGTTAATGGGAGAAGGTGGTCACAAAATGAGAAACAAGGCCAAAGAATGGAAGGAAAAGGCTCGTATTGCCACATGCCCTAACGGTTCATCTTCTTTGAATGTGGATAAAATTGTCGAGGAGATAACGGTGCTATCAAGAGACTAG

SrUGT91D1-1

ATGTTCCCATGGCTTGCTTTCGGTCACATTCTCCCATTCTTCGAACTCTCCAAATTCATAACCAAAAACGGTCACAAAGTTTCTTTTCTTTCCCCCACCGGAAACATACAACGTCTCCCTTCTTCTAATCTTTCGCCACTCATGAATCTTGTTAAACTCACACTTCCACGTGTTCAAGAGCTGCCCCAAAATGCATCCGCCACCACGGACCTCCATGCTGATGATGTCCAATATCTCAAACAAGCTTTTGATGGTCTTCAACCGGAGGTCACTCAATTTCTTGAACAAGAGTCGCCGGACTGGATTATTTATGATTTTGCTCCCTATTGGTTGCCGGCGGTAGCCACTAGCCTTGGAATTTCACGAGGTTTTTTCTCAATCTATAACGCATGGACCGTCTCTTTTATCGGATCGTCTTCCGATAACATGATAAACGGTACAGACAATCGGAAAACACCCGACGATTTCTTGACACCGCCGAAGTGGGTTCCGTTTCCAAGCAAAGTATGCTACCGGAAGCATGAGGCCAATTCGATATTTGCTGATAATTTTTCTATTAATTCTTCTGGGGTTTCAGATATATATCGTGCTGGAATGGTTATAAAGGGATCAGATTGTATGTTTATAAGACATTGCCATGAGTTCGAACCCCAATGGCTAACCCTTTTAGAAAAGCTGCATCACCTACCAGTGGTTCCCGTGGGATTATTGCCACCCGAACCACCCACCAGCACCGGAGACCCATGGGTGACAATCAAGAAGTGGCTCGATGGTCAACCAATAGGGCATGTGGTGTACGTGGCATTTGGAAGTGAAGGTACGATGAGCCAAAGCGAGCTGGCTGAGTTAGCTCTGGGCCTCGAGCTCTCCGGGTTGCCATTCTCTTGGGTTCTTAGAAAACCGGTTGGCTCTGGTAACTCGGTGGAGTTGCCAGAGGGGTTCTTGGAACGAACTCGTGACCGTGGGTTGGTGTGGACGAGTTGGGTACCTCAGTTACAAATACTGAGCCATGAGTCAGTGTGTGGTTTCTTGACTCATTCTGGTTGGAGTTCATTTGTGGAAGCGATGATGTTCGGTCACCCTTTGATAATGCTACCGCTTTCGGTGGATCAAGGTCTAAATGCTCGAGTAATGGCGGATAATCAGGTGGGAATTGAGATACCAAGAAATGACGAAGATGGTTCATTCACCAAGGAGTCGGTGGCCAGATCATTGAGGTTGGTTTTAGTCGATGATGAAGGGAAGATCTACAAGGCGAAGGCGATGGAGTTGAGTCAACGATTCGGGGATAGTAAGCCGGAAAATAAGTATATAAACCCTTTTATAGACTATTTGGAACAAAAAGGTCGTGTGGTTGCTATTGAGCATGAGCTTTGA

SrUGT95A2

ATGGATACCGAAAATCAGACCAAGAAAAGAAAGCTTGAATCCACAACAATGGAAGCTGCCGGTGAGATCTTTGTTCTACCATTCTTCGGTCAAGGTCATCTCAACCCATCGATGGAACTCTGCCGGAACATCTCCTCTCATAACTTCAATGTCACACTCATCATCCCCTCTCACCTTTCTTCATCGATCCCTGCAACTTTTCCCGGCGATTCGCCCTTCATTCATGTTGCAGAGATTCCGTTCGCCGCTTCTCCGCCGGAAACAGAGGCTCCGAATTGGGGGAACCGTTTTGAACAGCAGAATAAACAGATGGGTGAGGGAATCAAGTCGTTTTTGTCGAATAGATCCGGAATCCGACCCACGTGCGTTGTGATTGATGTTATGATGAGCTCGATCAAGGAGATTTTTGCAGATCACCGGATTCCGGTGGTGTCGTTTTTCACTTCCGGCGTGACGAATTACGCCATAGAGCACGGAAAGTGGAAGGCGAAGATCGGAGACTTGAAACCCGGTGAGACCCGAGAGTTACCCGGGTTACCCAAAGAAATGGCTGCTACTTATTTGGATCTTTTCAAAGGTCCGAGAGGAAGAGCTCAGAGACCCAACCTGCCGACTGGAGATCACGCAAACCGGGTCGGACCGCCACATGGATCAAGGAGCCACCGCGGTCCACCCGGTCCGGGTGATAAGCCACGTTGGGTTGACGAAGTTGATGGAGCGGTCGCGTTGCTTATCAACACATGCGACAATCTCGAGCGTTTGTTCCTCGATTACCTCACGGAACAAACCAAGGTTCCGGTGTGGGGCGTCGGACCGCTCCTACCGGAAAAATTCTGGCAATCCGCCGGTTCAGTCCTCCACGATCGGGATATGAGATCGAATCGGAAAGCTAATTACTCAGAAGACGAAGTTTTCCAATGGCTAGAGTCCAAACCAATAGGTTCGGTGCTCTACATCGCATTCGGAAGTGAAGTTGGACCCTCGATTGATGAATACAAAGAACTAGCGAAAGCGTTGGAAGAATCGAACCACGCTTTCATATGGGTGATCCAACCCGGTTCGGGTAAAAACCCGATCCCAAAATCTTTTTTAGGACCGGTTCAAACCGATAGCGAAGAAGAACAAGAAGGTTACTATCCAGATGGTTTAGACAAAATAGTTGGGAATAGGGGTATGATCATCACCGGATGGGCCCCACAATTGTTGATTCTGAGCCACCCATCAACCGGTGGGTTCTTGTCACACTGCGGTTGGAACTCGACTGTTGAGGCGATTGGTCGAGGGGTCCCGATCTTGGGTTGGCCAATTAGGGGTGATCAGTTTGAAAATGCGAAGCTGGTGGCTAACCATCTCAAGATTGGGTTCGTGATTGCAAGTGGGGTCGGTGAAGACGGTCGGCCGAAAAGGTTCAACAAGGATGATATAGAAACAGGGGTTGATAAACTGATGAGTGATGAAGAGGTTCATGAAAATGCCAAGAAATTAAGTAAGGAGTTTGAAAGTGGGTTTCCAGTGAGTTCGGTTAATGCTTTGGGTGCATTTGTGGAGTTTATTAGCAAAAAAGCAACTTGA

**SrUGT85B4**

ATGGGTTCGGTTCAAGAGAAAAAGGCGCCACATGTTGTGTGCATACCGGCACCACTTCAAGGTCACATTAACCCGATGCTAAAACTAGCCAAAATCCTACACTCCAAAGGCTTTCTTATCACCTTTGTCAACACCGAGTTTAACCACCAACGGCTCGTTAGGTCACAGGGGGTTGAAGCCCTACACGGGCTCCCAACCTTCCGGTTCGAGACCATCCCAGATGGTCTACCGCCACCTGAAAACAAAGATGCCACCCAAGATATCCCGACTCTAGCCAAGTCGGTTGATGAAAACTTTTTGGGTCCGTTTAAAAGTCTTGTAACCAATGTGGGTGCTTTGTATGCACCCGTGACTTGTATCGTGTCTGACATGCTTATGTGCTTCACTCTTGATGCCGGTGCTGAATTGGATATCCCGGTGATACTCCATTGGACCAGTGGTACTGGTTCTTTGATATGTTACAATGAATATCCTAATCTATTGGAAAGCAAATTGATGCCCCTCAAAGATGCAAGTTATTTAGTGAATGGTTACTTAGATACGATTGTAGATTCTATCCCCATTTTGCATGGCATACGTTTAAGAGATTTCCCTCCCTTCATTAGAAAGATCTTTCCTGGTGATGAGTTCATGGTTCAATTTTTGACTTCACAAGTAAACAAAGCAAAAAACGGATCTTCTGCTATCATTTTCAACACTTTTGATGAACTAGATCGTGATGTTTTAGACACACTCGCTTCAATGTATCCTCCATGTTATGGAATTGGTCCGTTACATCTACTAGAGAAACATGTTACCGATAAATCTCTTGATTTCGTGAAATCAAACCTTTGGAAAGAAGAACCCGAATGTTTAAAATGGTTAGATACACAAGCTCCATCATCAGTCATTTATGTGAATTTTGGTAGCATTACAGTAATGACACCTCAACAACTAGTCGAGTTTTGTTGGGGACTCGCAAAGAGCAACTATCCGTTCTTATGGATAATACGACCTGACCTTGTGATTGGTGATTCCGCGATGCTTCCACCCGAGTTTGTGAAGGAAACAAGTGATAGAGGGATGCTGGTTGGATGGTGTCCTCAAGAAGAAGTTTTGAATCACCCGTCAATTGGAGGGTTTTTAACGCACAGTGGATGGAATTCAACGCTTGAAAGTATTTCGAGTGGTGTGCCGATGATTTGTTGGCCGTTTTTTGCGGATCAACAAACGAATTGCTGGTGGAGTTGCAACAAATGGGGTGTTTCCATGGAGATTGATAATAATGTAAAGAGTGATGAAGTTTCAAAGCTTGTGATTGAATTAATGGATGGAGAAAAAGGAAAGGAAATTAAAAAGAATGCCATTGACTTGAAGAATAAAGCTGAGGATGCATGTACCTCTCCTCTTGGTTCATCAGTGGTTAATTTGGAGAAAGTGGTTCAACTGATTCGTACATTTTCAAAATAA
